# Supplementary material for: Divergent synthesis of 1,3,5-tri and 1,3-disubstituted pyrazoles under transition metal-free conditions
Source: Royal Society of Chemistry journal article supplement (doi:10.1039/d0ob01478h), 2020-01-01

## Supplementary Information

### Divergent Synthesis of 1,3,5-Tri and 1,3-Disubstituted Pyrazoles under Transition Metal-Free Conditions

Liyao Ma,<sup>a,b</sup> Pengcheng Ou,<sup>a,b</sup> Xueliang Huang,<sup>\*b</sup>

<sup>a</sup> College of Chemistry, Fuzhou University, Fuzhou 350116, China

<sup>b</sup> Key Laboratory of Coal to Ethylene Glycol and Its Related Technology, Fujian Institute  
of Research on the Structure of Matter, Fujian College, Chinese Academy of Sciences.  
Fuzhou, Fujian, 350002, P. R. China.

[huangxl@fjirsm.ac.cn](mailto:huangxl@fjirsm.ac.cn)

## Table of Content

|                                  |     |
|----------------------------------|-----|
| General information .....        | S2  |
| Reaction Optimization.....       | S3  |
| General procedure .....          | S6  |
| Crystal data of product 4a ..... | S28 |
| NMR Spectra.....                 | S29 |

## General information

Unless otherwise indicated, all glassware was oven dried by a heat gun before use and all reactions were performed under an atmosphere of Argon. All solvents were distilled from appropriate drying agents prior to use. All reagents were used as received from commercial suppliers unless otherwise stated. Arylvinyl N-tosylhydrazones were prepared according to the procedures reported in the literature. Reaction progress was monitored by thin layer chromatography (TLC). Visualization was achieved by ultraviolet light (254 nm).  $^1\text{H}$  NMR and  $^{13}\text{C}$  NMR spectra were recorded on a 400 MHz and 101 MHz or spectrometer using  $\text{CDCl}_3$  or as solvent and TMS as internal standard. The  $^1\text{H}$  NMR data are reported as the chemical shift in parts per million, multiplicity (s, singlet; d, doublet; t, triplet; q, quartet; m, multiplet), coupling constant in hertz, and number of protons. High resolution mass spectra were obtained using a high resolution ESI-TOF mass spectrometer.

## Reaction Optimization

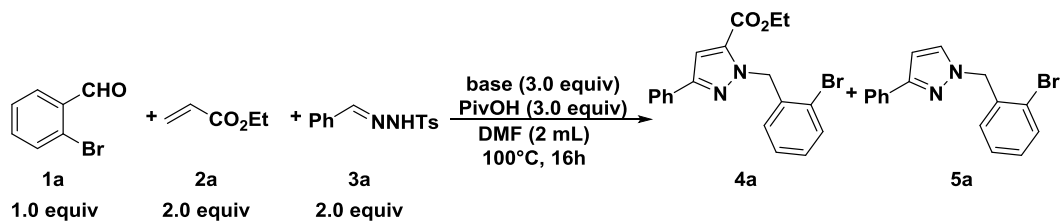

| entry | base                            | GC yield of 4a <sup>a</sup> | GC yield of 5a <sup>a</sup> |
|-------|---------------------------------|-----------------------------|-----------------------------|
| 1     | K <sub>2</sub> CO <sub>3</sub>  | trace                       | 54%                         |
| 2     | Na <sub>2</sub> CO <sub>3</sub> | 22%                         | 33%                         |
| 3     | Cs <sub>2</sub> CO <sub>3</sub> | trace                       | 66%                         |
| 4     | K <sub>3</sub> PO <sub>4</sub>  | 46%                         | 23%                         |
| 5     | NaO <sup>t</sup> Bu             | 36%                         | 9%                          |
| 6     | LiOAc                           | 39%                         | trace                       |
| 7     | CsOAc                           | 58%                         | 9%                          |
| 8     | CsF                             | 61%                         | trace                       |
| 9     | NaOMe                           | 50%                         | trace                       |
| 10    | NaOAc                           | 52%                         | trace                       |
| 11    | KOAc                            | 63%                         | trace                       |
| 12    | Et <sub>3</sub> N               | 24%                         | 0                           |
| 13    | DABCO                           | 52%                         | 0                           |
| 14    | DMAP                            | 20%                         | 0                           |
| 15    | DBU                             | 54%                         | 19%                         |
| 16    | pyridine                        | 34%                         | 0                           |

<sup>a</sup>Yield determined by GC with decane as the internal standard, and isolated yields were indicated in parentheses.

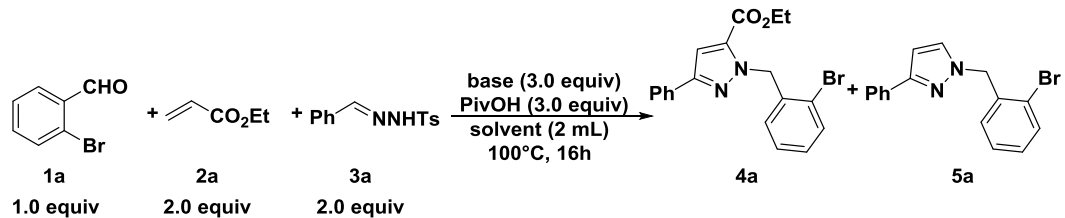

| entry | base                            | solvent            | GC yield of <b>4a</b> <sup>a</sup> | GC yield of <b>5a</b> <sup>a</sup> |
|-------|---------------------------------|--------------------|------------------------------------|------------------------------------|
| 1     | KOAc                            | DMA                | 60%                                | 13%                                |
| 2     | KOAc                            | DME                | 16%                                | trace                              |
| 3     | KOAc                            | DMSO               | 39%                                | 18%                                |
| 4     | KOAc                            | DMF                | 63%                                | 9%                                 |
| 5     | Cs <sub>2</sub> CO <sub>3</sub> | DMA                | 9%                                 | 60%                                |
| 6     | Cs <sub>2</sub> CO <sub>3</sub> | DME                | 12%                                | 47%                                |
| 7     | Cs <sub>2</sub> CO <sub>3</sub> | DMSO               | trace                              | 42%                                |
| 8     | Cs <sub>2</sub> CO <sub>3</sub> | THF                | 9%                                 | 37%                                |
| 9     | Cs <sub>2</sub> CO <sub>3</sub> | CH <sub>3</sub> CN | 36%                                | 27%                                |
| 10    | Cs <sub>2</sub> CO <sub>3</sub> | dioxane            | trace                              | 21%                                |
| 11    | Cs <sub>2</sub> CO <sub>3</sub> | DCE                | 10%                                | trace                              |
| 12    | Cs <sub>2</sub> CO <sub>3</sub> | toluene            | trace                              | trace                              |
| 13    | Cs <sub>2</sub> CO <sub>3</sub> | CH <sub>3</sub> OH | 0                                  | trace                              |
| 14    | Cs <sub>2</sub> CO <sub>3</sub> | DMF                | trace                              | 66%                                |

<sup>a</sup>Yield determined by GC with decane as the internal standard, and isolated yields were indicated in parentheses.

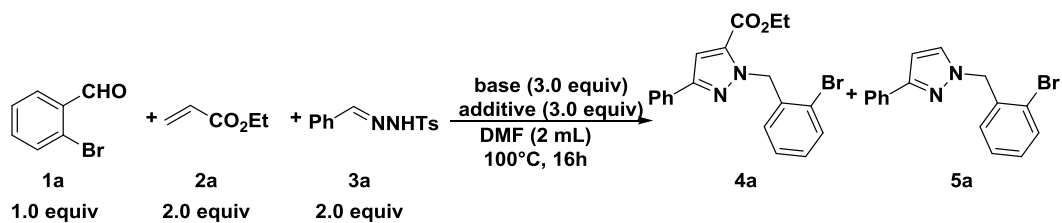

| entry                   | base                                | additive     | GC yield of <b>4a</b> <sup>a</sup> | GC yield of <b>5a</b> <sup>a</sup> |
|-------------------------|-------------------------------------|--------------|------------------------------------|------------------------------------|
| 1                       | K <sub>2</sub> CO <sub>3</sub>      | --           | trace                              | 11%                                |
| 2                       | K <sub>2</sub> CO <sub>3</sub>      | A1           | 27%                                | 20%                                |
| 3                       | K <sub>2</sub> CO <sub>3</sub>      | A2           | 21%                                | 33%                                |
| 4                       | K <sub>2</sub> CO <sub>3</sub>      | A3           | trace                              | trace                              |
| 5                       | K <sub>2</sub> CO <sub>3</sub>      | A4           | trace                              | trace                              |
| 6                       | K <sub>2</sub> CO <sub>3</sub>      | PivOH        | trace                              | 54%                                |
| 7                       | Cs <sub>2</sub> CO <sub>3</sub>     | A2           | 12%                                | 55%                                |
| 8                       | Cs <sub>2</sub> CO <sub>3</sub>     | PivOH        | trace                              | 66%                                |
| 9 <sup>c</sup>          | Cs <sub>2</sub> CO <sub>3</sub>     | PivOH        | trace                              | 69%                                |
| 10 <sup>b</sup>         | Cs <sub>2</sub> CO <sub>3</sub>     | HCOOH        | 14%                                | trace                              |
| 11 <sup>b</sup>         | Cs <sub>2</sub> CO <sub>3</sub>     | HOAc         | 8%                                 | 47%                                |
| <b>12<sup>b,c</sup></b> | <b>Cs<sub>2</sub>CO<sub>3</sub></b> | <b>PivOH</b> | <b>trace</b>                       | <b>73(71)%</b>                     |
| 13                      | KOAc                                | A2           | 55%                                | 9%                                 |
| 14 <sup>b</sup>         | KOAc                                | TsOH         | trace                              | 0                                  |
| 15 <sup>b</sup>         | KOAc                                | HCl          | 0                                  | 0                                  |
| 16 <sup>b</sup>         | KOAc                                | HCOOH        | 8%                                 | 0                                  |
| 17 <sup>b</sup>         | KOAc                                | HOAc         | 49%                                | trace                              |
| 18                      | KOAc                                | PivOH        | 63%                                | 9%                                 |
| <b>19<sup>b</sup></b>   | <b>KOAc</b>                         | <b>PivOH</b> | <b>85(83)%</b>                     | <b>trace</b>                       |

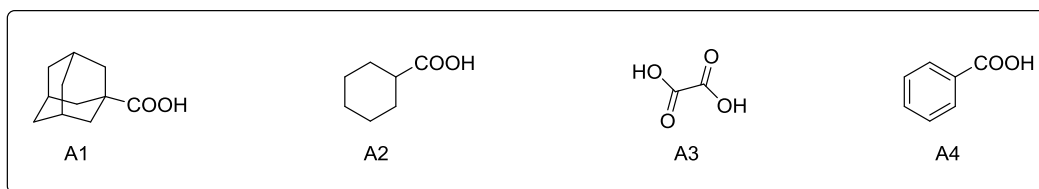

<sup>a</sup>Yield determined by GC with decane as the internal standard, and isolated yields were indicated in parentheses, <sup>b</sup>additive (4.0 equiv), <sup>c</sup>T=120°C.

## General procedure

### General procedure for preparation of 1,3,5-trisubstituted pyrazoles 4:

An oven-dried Schlenk tube under argon atmosphere was charged with 2-bromobenzaldehyde **1a** (0.2 mmol, 1.0 equiv), ethyl acrylate **2a** (0.4 mmol, 2.0 equiv), phenylhydrazine **3a** (0.4 mmol, 2.0 equiv), KOAc (0.60 mmol, 3.0 equiv), PivOH (0.8 mmol, 4.0 equiv) and DMF (2 mL). The mixture was stirred at 100 °C and the progress of the reaction was monitored by TLC. Upon completion, the resulting mixture was cooled to room temperature and added 10 mL of H<sub>2</sub>O to quench the reaction, and then extracted with ethyl acetate (20 mL×3). The solvents were evaporated under reduced pressure and the residue was purified by flash chromatography on silica gel to afford the products.

### Ethyl 1-(2-bromobenzyl)-3-phenyl-1H-pyrazole-5-carboxylate (**4a**)

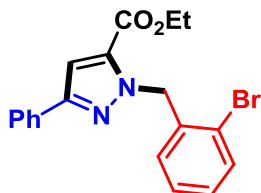

Yield: 83% (63.7 mg); white solid;  $R_f = 0.25$  (petroleum ether : ethyl acetate = 50 : 1).

<sup>1</sup>H NMR (400 MHz, CDCl<sub>3</sub>):  $\delta = 7.85$  (d,  $J = 7.6$  Hz, 2H),  $7.57$  (dd,  $J_1 = 7.6$  Hz,  $J_2 = 0.8$  Hz, 1H),  $7.42$  (t,  $J = 7.2$  Hz, 2H),  $7.34$  (t,  $J = 7.6$  Hz, 1H),  $7.28$  (s, 1H),  $7.17 - 7.09$ , (m, 2H),  $6.47$  (d,  $J = 7.6$  Hz, 1H),  $5.89$  (s, 2H),  $4.30$  (q,  $J = 7.2$  Hz, 2H),  $1.31$  (t,  $J = 7.2$  Hz, 3H).

<sup>13</sup>C NMR (101 MHz, CDCl<sub>3</sub>):  $\delta = 159.2, 150.7, 137.1, 134.3, 132.5, 132.3, 128.73, 128.68, 128.2, 127.7, 126.9, 125.6, 121.6, 108.6, 61.3, 55.6, 14.1$ .

HRMS (ESI):  $m/z$  calcd for C<sub>19</sub>H<sub>18</sub>BrN<sub>2</sub>O<sub>2</sub><sup>+</sup> (M+H)<sup>+</sup> 385.05462, found 385.05481.

**Ethyl 1-(3-bromobenzyl)-3-phenyl-1H-pyrazole-5-carboxylate (4b)**

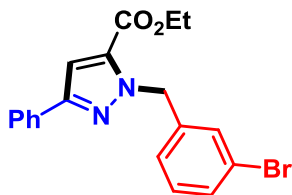

Yield: 48% (37.2 mg); yellow liquid;  $R_f = 0.33$  (petroleum ether : ethyl acetate = 50 : 1).

$^1\text{H NMR}$  (400 MHz,  $\text{CDCl}_3$ ):  $\delta = 7.83$  (d,  $J = 7.2$  Hz, 2H), 7.43-7.31 (m, 5H), 7.24 – 7.13 (m, 3H), 5.76 (s, 2H), 4.32 (q,  $J = 7.2$  Hz, 2H), 1.35 (t,  $J = 7.2$  Hz, 3H).

$^{13}\text{C NMR}$  (101 MHz,  $\text{CDCl}_3$ ):  $\delta = 159.5, 150.5, 139.3, 133.4, 132.3, 130.8, 130.5, 130.0, 128.7, 128.2, 126.1, 125.6, 122.5, 108.6, 61.2, 54.4, 14.2$ .

HRMS (ESI):  $m/z$  calcd for  $\text{C}_{19}\text{H}_{18}\text{BrN}_2\text{O}_2^+$  ( $\text{M}+\text{H}$ ) $^+$  385.05462, found 385.05481.

**Ethyl 1-(4-bromobenzyl)-3-phenyl-1H-pyrazole-5-carboxylate (4c)**

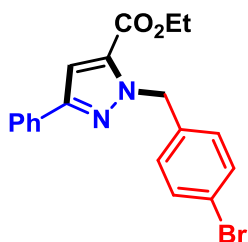

Yield 60% (45.7 mg); white solid;  $R_f = 0.33$  (petroleum ether : ethyl acetate = 50 : 1).

$^1\text{H NMR}$  (400 MHz,  $\text{CDCl}_3$ ):  $\delta = 7.83$  (d,  $J = 7.6$  Hz, 2H), 7.43 – 7.39 (m, 4H), 7.35 – 7.29 (m, 1H), 7.9-7.17 (m, 3H), 5.74 (s, 2H), 4.31 (q,  $J = 7.2$  Hz, 2H), 1.35 (t,  $J = 7.2$  Hz, 3H).

$^{13}\text{C NMR}$  (101 MHz,  $\text{CDCl}_3$ ):  $\delta = 159.5, 150.4, 136.1, 133.3, 132.3, 131.6, 129.3, 128.7, 128.1, 125.6, 121.6, 108.5, 61.1, 54.4, 14.2$ .

HRMS (ESI):  $m/z$  calcd for  $\text{C}_{19}\text{H}_{18}\text{BrN}_2\text{O}_2^+$  ( $\text{M}+\text{H}$ ) $^+$  385.05462, found 385.05499.

**Ethyl 1-(4-chlorobenzyl)-3-phenyl-1H-pyrazole-5-carboxylate (4d)**

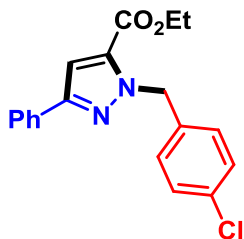

Yield 56% (38.4 mg); light yellow solid;  $R_f = 0.23$  (petroleum ether : ethyl acetate = 50 : 1).

$^1\text{H}$  NMR (400 MHz,  $\text{CDCl}_3$ ):  $\delta=7.83$  (d,  $J = 7.2$  Hz, 2H), 7.41 (t,  $J = 7.2$  Hz, 2H), 7.33 (t,  $J = 7.2$  Hz, 1H), 7.27 – 7.22 (m, 4H), 7.17 (s, 1H), 5.76 (s, 2H), 4.31 (q,  $J = 7.2$  Hz, 2H), 1.35 (t,  $J = 7.2$  Hz, 3H).

$^{13}\text{C}$  NMR (101 MHz,  $\text{CDCl}_3$ ):  $\delta=159.5$ , 150.4, 135.6, 133.5, 133.3, 132.3, 128.9, 128.7, 128.6, 128.1, 125.6, 108.5, 61.1, 54.3, 14.2.

#### Ethyl 1-benzyl-3-phenyl-1H-pyrazole-5-carboxylate (4e)

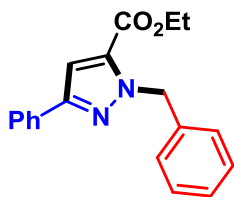

Yield 80% (49.1 mg); white solid;  $R_f = 0.30$  (petroleum ether : ethyl acetate = 50 : 1).

$^1\text{H}$  NMR (400 MHz,  $\text{CDCl}_3$ ):  $\delta=7.84$  (d,  $J = 7.2$  Hz, 2H), 7.41 (t,  $J = 7.2$  Hz, 2H), 7.35 – 7.25 (m, 6H), 7.18 (s, 1H), 5.81 (s, 2H), 4.31 (q,  $J = 7.2$  Hz, 2H), 1.35 (t,  $J = 7.2$  Hz, 3H).

$^{13}\text{C}$  NMR (101 MHz,  $\text{CDCl}_3$ ):  $\delta=159.6$ , 150.2, 137.2, 133.4, 132.5, 128.7, 128.5, 128.0, 127.6, 127.4, 125.6, 108.5, 61.1, 55.1, 14.2.



**Ethyl 1-(4-methylbenzyl)-3-phenyl-1H-pyrazole-5-carboxylate (4f)**

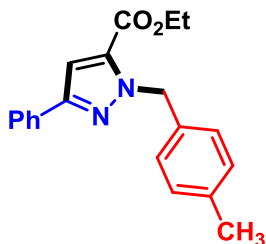

Yield 78% (50.2 mg); white solid;  $R_f = 0.23$  (petroleum ether : ethyl acetate = 50 : 1).

$^1\text{H}$  NMR (400 MHz,  $\text{CDCl}_3$ ):  $\delta = 7.84$  (d,  $J = 7.6$  Hz, 2H), 7.41 (t,  $J = 7.6$  Hz, 2H), 7.32 (t,  $J = 7.6$  Hz, 1H), 7.25 – 7.09 (m, 5H), 5.77 (s, 2H), 4.32 (q,  $J = 7.2$  Hz, 2H), 2.30 (s, 3H), 1.35 (t,  $J = 7.2$  Hz, 3H).

$^{13}\text{C}$  NMR (101 MHz,  $\text{CDCl}_3$ ):  $\delta = 159.6, 150.1, 137.3, 134.2, 133.3, 132.6, 129.1, 128.6, 128.0, 127.5, 125.6, 108.5, 61.0, 54.9, 21.1, 14.2$ .

**Ethyl 1-([1,1'-biphenyl]-4-ylmethyl)-3-phenyl-1H-pyrazole-5-carboxylate (4g)**

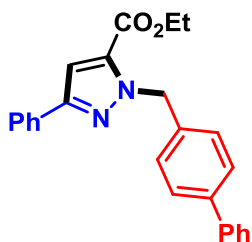

Yield 76% (58.0 mg); white solid;  $R_f = 0.23$  (petroleum ether : ethyl acetate = 50 : 1).

$^1\text{H}$  NMR (400 MHz,  $\text{CDCl}_3$ ):  $\delta = 7.86$  (d,  $J = 7.2$  Hz, 2H), 7.53 (t,  $J = 8.0$  Hz, 4H), 7.44 – 7.30 (m, 8H), 7.19 (s, 1H), 5.85 (s, 2H), 4.33 (q,  $J = 7.2$  Hz, 2H), 1.35 (t,  $J = 7.2$  Hz, 3H).

$^{13}\text{C}$  NMR (101 MHz,  $\text{CDCl}_3$ ):  $\delta = 159.6, 150.3, 140.7, 140.5, 136.2, 133.4, 132.5, 128.70, 128.67, 128.1, 127.9, 127.2, 127.0, 125.6, 108.5, 61.1, 54.8, 27.0, 14.2$ .

HRMS (ESI):  $m/z$  calcd for  $\text{C}_{25}\text{H}_{23}\text{N}_2\text{O}_2^+$  ( $\text{M}+\text{H}$ ) $^+$  383.17540, found 383.17548.

**ethyl 1-(4-methoxybenzyl)-3-phenyl-1H-pyrazole-5-carboxylate (4h)**

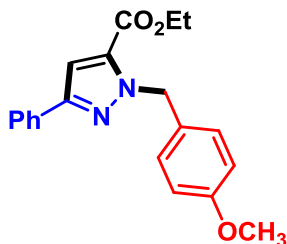

Yield 77% (51.5 mg); light yellow solid;  $R_f = 0.15$  (petroleum ether : ethyl acetate = 50 : 1).

$^1\text{H}$  NMR (400 MHz,  $\text{CDCl}_3$ ):  $\delta = 7.83$  (d,  $J = 7.2$  Hz, 2H), 7.40 (t,  $J = 7.2$  Hz, 2H), 7.33 - 7.28 (m, 3H), 7.15 (s, 1H), 6.82 (d,  $J = 8.6$  Hz, 2H), 5.73 (s, 2H), 4.32 (q,  $J = 7.2$  Hz, 2H), 3.75 (s, 3H), 1.35 (t,  $J = 7.2$  Hz, 3H).

$^{13}\text{C}$  NMR (101 MHz,  $\text{CDCl}_3$ ):  $\delta = 159.6, 159.0, 150.0, 133.1, 132.6, 129.3, 129.0, 128.6, 128.0, 125.6, 113.8, 108.4, 61.0, 55.2, 54.5, 14.2$ .

**ethyl 1-(3,4-dimethoxybenzyl)-3-phenyl-1H-pyrazole-5-carboxylate (4i)**

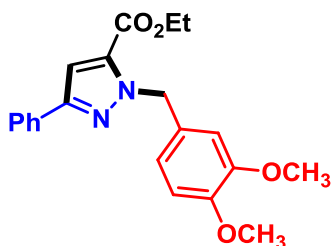

Yield 86% (63.2 mg); white solid;  $R_f = 0.1$  (petroleum ether : ethyl acetate = 50 : 1).

$^1\text{H}$  NMR (400 MHz,  $\text{CDCl}_3$ ):  $\delta = 7.82$  (d,  $J = 7.2$  Hz, 2H), 7.38 (t,  $J = 7.6$  Hz, 2H), 7.30 (t,  $J = 7.6$  Hz, 1H), 7.20 (s, 1H), 6.90 (t,  $J = 8.0$  Hz, 1H), 6.80 (d,  $J = 8.0$  Hz, 1H), 6.35 (d,  $J = 8.0$  Hz, 1H), 5.90 (s, 2H), 4.30 (q,  $J = 7.2$  Hz, 2H), 3.93 (s, 3H), 3.83 (s, 3H), 1.33 (t,  $J = 6.8$  Hz, 3H).

$^{13}\text{C}$  NMR (101 MHz,  $\text{CDCl}_3$ ):  $\delta = 159.4, 152.4, 150.1, 146.2, 133.9, 132.5, 131.5, 128.6, 127.9, 125.5, 124.0, 119.1, 111.6, 108.2, 61.0, 60.4, 55.7, 50.2, 14.1$ .

HRMS (ESI):  $m/z$  calcd for  $C_{21}H_{23}N_2O_4^+$  (M+H)<sup>+</sup> 367.16523, found 367.16525.

**Ethyl 3-phenyl-1-(thiophen-2-ylmethyl)-1H-pyrazole-5-carboxylate (4j)**

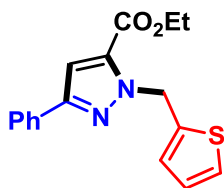

Yield 79% (62.4 mg); light yellow solid;  $R_f$  = 0.25 (petroleum ether : ethyl acetate = 50 : 1).

<sup>1</sup>H NMR (400 MHz, CDCl<sub>3</sub>):  $\delta$ =7.83 – 7.81 (m, 2H), 7.39 (t,  $J$  = 7.2 Hz, 2H), 7.30 (t,  $J$  = 7.2 Hz, 1H), 7.22 – 7.11 (m, 3H), 6.92 – 6.90 (m, 1H), 5.95 (s, 2H), 4.36 (q,  $J$  = 7.2 Hz, 2H), 1.38 (t,  $J$  = 7.2 Hz, 3H).

<sup>13</sup>C NMR (101 MHz, CDCl<sub>3</sub>):  $\delta$ =159.6, 150.4, 138.9, 132.9, 132.4, 128.6, 128.0, 126.9, 126.6, 125.8, 125.6, 108.4, 61.1, 49.7, 14.2.

HRMS (ESI):  $m/z$  calcd for  $C_{17}H_{17}N_2O_2S^+$  (M+H)<sup>+</sup> 313.10052, found 313.10046.

**Ethyl 1-(furan-2-ylmethyl)-3-phenyl-1H-pyrazole-5-carboxylate (4k)**

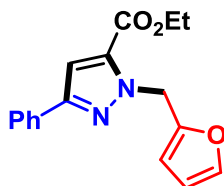

Yield 77% (45.4 mg); Brown liquid;  $R_f$  = 0.25 (petroleum ether : ethyl acetate = 50 : 1).

<sup>1</sup>H NMR (400 MHz, CDCl<sub>3</sub>):  $\delta$ =7.81 (d,  $J$  = 7.2 Hz, 2H), 7.39 (t,  $J$  = 7.2 Hz, 2H), 7.34 – 7.24 (m, 2H), 7.15 (s, 1H), 6.34 – 6.29 (m, 2H), 5.80 (s, 2H), 4.37 (q,  $J$  = 6.8 Hz, 2H), 1.39 (t,  $J$  = 7.2 Hz, 3H).

<sup>13</sup>C NMR (101 MHz, CDCl<sub>3</sub>):  $\delta$ =159.6, 150.4, 150.0, 142.5, 133.3, 132.4, 128.6, 128.0, 125.6, 110.3, 108.6, 108.4, 61.1, 48.1, 14.2.

HRMS (ESI):  $m/z$  calcd for  $C_{17}H_{17}N_2O_3^+$  (M+H)<sup>+</sup> 297.12337, found 297.12326.

**Ethyl 1-benzyl-3-(4-chlorophenyl)-1H-pyrazole-5-carboxylate (4l)**

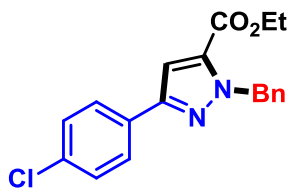

Yield 86% (58.7 mg); white solid;  $R_f$  = 0.35 (petroleum ether : ethyl acetate = 50 : 1).

<sup>1</sup>H NMR (400 MHz, CDCl<sub>3</sub>):  $\delta$ =7.76 (d,  $J$  = 8.4 Hz, 2H), 7.37 (d,  $J$  = 8.8 Hz, 2H), 7.32 – 7.20 (m, 5H), 7.14 (s, 1H), 5.79 (s, 2H), 4.31 (q,  $J$  = 7.2 Hz, 2H), 1.34 (t,  $J$  = 7.2 Hz, 3H).

<sup>13</sup>C NMR (101 MHz, CDCl<sub>3</sub>):  $\delta$ =159.4, 149.1, 137.0, 133.8, 133.5, 131.0, 128.8, 128.5, 127.6, 127.4, 126.8, 108.4, 61.1, 55.1, 14.2.

**Ethyl 1-benzyl-3-(3-chlorophenyl)-1H-pyrazole-5-carboxylate (4m)**

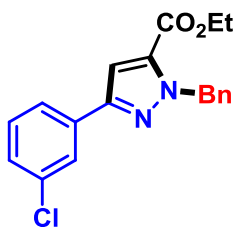

Yield 75% (51.1 mg); white solid;  $R_f$  = 0.35 (petroleum ether : ethyl acetate = 50 : 1).

<sup>1</sup>H NMR (400 MHz, CDCl<sub>3</sub>):  $\delta$ =7.84 (s, 1H), 7.69 (d,  $J$  = 7.2 Hz, 1H), 7.34 – 7.24 (m, 7H), 7.15 (s, 1H), 5.80 (s, 2H), 4.31 (q,  $J$  = 7.2 Hz, 2H), 1.34 (t,  $J$  = 7.2 Hz, 3H).

<sup>13</sup>C NMR (101 MHz, CDCl<sub>3</sub>):  $\delta$ =159.4, 148.8, 136.9, 134.7, 134.3, 133.6, 129.9, 128.5, 128.0, 127.7, 127.5, 125.6, 123.6, 108.6, 61.1, 55.1, 14.1.

HRMS (ESI):  $m/z$  calcd for  $C_{19}H_{18}ClN_2O_2^+$  (M+H)<sup>+</sup> 341.10513, found 341.10541.

**Ethyl 1-benzyl-3-(4-fluorophenyl)-1H-pyrazole-5-carboxylate (4n)**

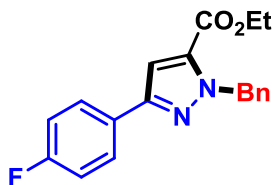

Yield 77% (49.6 mg); white solid;  $R_f = 0.35$  (petroleum ether : ethyl acetate = 50 : 1).

$^1\text{H}$  NMR (400 MHz,  $\text{CDCl}_3$ ):  $\delta = 7.82 - 7.77$  (m, 2H), 7.30 – 7.23 (m, 5H), 7.11 – 7.06 (m, 3H), 5.79 (s, 2H), 4.31 (d,  $J = 7.2$  Hz, 2H), 1.33 (t,  $J = 7.2$  Hz, 3H).

$^{13}\text{C}$  NMR (101 MHz,  $\text{CDCl}_3$ ):  $\delta = 163.2$  (d,  $J = 248.0$  Hz), 159.5, 149.3, 137.1, 133.5, 128.8, (d,  $J = 3.2$  Hz), 128.5, 127.6, 127.4, 127.3 (d,  $J = 8.1$  Hz), 115.5 (d,  $J = 21.7$  Hz), 108.2, 61.1, 55.0, 14.1.

$^{19}\text{F}$  NMR (376 MHz,  $\text{CDCl}_3$ ):  $\delta = -113.9$ .

**Ethyl 1-benzyl-3-(4-cyanophenyl)-1H-pyrazole-5-carboxylate (4o)**

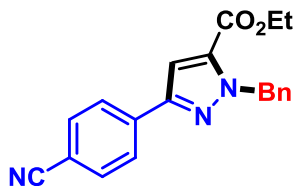

Yield 61% (40.3 mg); white solid;  $R_f = 0.12$  (petroleum ether : ethyl acetate = 50 : 1).

$^1\text{H}$  NMR (400 MHz,  $\text{CDCl}_3$ ):  $\delta = 7.93$  (d,  $J = 8.0$  Hz, 2H), 7.68 (d,  $J = 8.0$  Hz, 2H), 7.33 – 7.26 (m, 5H), 7.22 (s, 1H), 5.82 (s, 2H), 4.34 (q,  $J = 7.2$  Hz, 2H), 1.36 (t,  $J = 7.2$  Hz, 3H).

$^{13}\text{C}$  NMR (101 MHz,  $\text{CDCl}_3$ ):  $\delta = 159.2$ , 148.2, 136.8, 136.6, 133.9, 132.5, 128.5, 127.8, 127.5, 125.9, 118.9, 111.3, 109.1, 61.3, 55.3, 14.1.

HRMS (ESI):  $m/z$  calcd for  $\text{C}_{20}\text{H}_{18}\text{N}_3\text{O}_2^+$  ( $\text{M}+\text{H}$ ) $^+$  332.13935, found 332.13925.

**Ethyl 1-benzyl-3-(4-(methoxycarbonyl)phenyl)-1H-pyrazole-5-carboxylate (4p)**

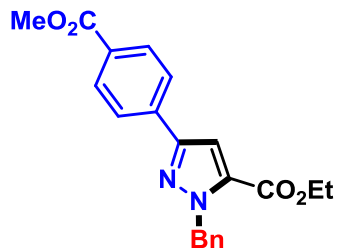

Yield 70% (49.7 mg); white solid;  $R_f = 0.11$  (petroleum ether : ethyl acetate = 50 : 1).

$^1\text{H}$  NMR (400 MHz,  $\text{CDCl}_3$ ):  $\delta = 8.08$  (d,  $J = 8.4$  Hz, 2H), 7.91 (d,  $J = 8.0$  Hz, 2H), 7.31 – 7.23 (m, 6H), 5.82 (s, 2H), 4.32 (q,  $J = 7.2$  Hz, 2H), 3.92 (s, 3H), 1.35 (t,  $J = 7.2$  Hz, 3H).

$^{13}\text{C}$  NMR (101 MHz,  $\text{CDCl}_3$ ):  $\delta = 166.8, 159.4, 149.1, 136.9, 136.8, 133.7, 130.0, 129.4, 128.5, 127.7, 127.5, 125.3, 109.0, 61.2, 55.2, 52.1, 14.1$ .

HRMS (ESI):  $m/z$  calcd for  $\text{C}_{21}\text{H}_{21}\text{N}_2\text{O}_4^+$  ( $\text{M}+\text{H}$ ) $^+$  365.14958, found 365.14935.

**Ethyl 1-benzyl-3-(p-tolyl)-1H-pyrazole-5-carboxylate (4q)**

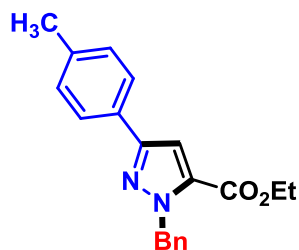

Yield 59% (37.9 mg); white solid;  $R_f = 0.3$  (petroleum ether : ethyl acetate = 50 : 1).

$^1\text{H}$  NMR (400 MHz,  $\text{CDCl}_3$ ):  $\delta = 7.73$  (d,  $J = 8.0$  Hz, 2H), 7.29 – 7.14 (m, 8H), 5.80 (s, 2H), 4.30 (q,  $J = 7.2$  Hz, 2H), 2.37 (s, 3H), 1.33 (t,  $J = 7.2$  Hz, 3H).

$^{13}\text{C}$  NMR (101 MHz,  $\text{CDCl}_3$ ):  $\delta = 159.6, 150.3, 137.9, 137.3, 133.3, 129.8, 129.3, 128.4, 127.5, 127.4, 125.5, 108.3, 61.0, 55.0, 21.3, 14.2$ .

**Ethyl 1-benzyl-3-(m-tolyl)-1H-pyrazole-5-carboxylate (4r)**

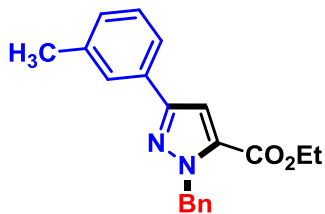

Yield 69% (44.4 mg); white solid;  $R_f = 0.27$  (petroleum ether : ethyl acetate = 50 : 1).

$^1\text{H}$  NMR (400 MHz,  $\text{CDCl}_3$ ):  $\delta = 7.68$  (s, 1H), 7.62 (d,  $J = 7.6$  Hz, 1H), 7.31 – 7.23 (m, 6H), 7.17 – 7.13 (m, 2H), 5.81 (s, 2H), 4.30 (q,  $J = 7.2$  Hz, 2H), 2.40 (s, 3H), 1.34 (t,  $J = 6.8$  Hz, 3H).

$^{13}\text{C}$  NMR (101 MHz,  $\text{CDCl}_3$ ):  $\delta = 159.6, 150.4, 138.3, 137.2, 133.3, 132.4, 128.8, 128.6, 128.4, 127.5, 127.4, 126.2, 122.8, 108.6, 61.0, 55.1, 21.4, 14.2$ .

HRMS (ESI):  $m/z$  calcd for  $\text{C}_{20}\text{H}_{21}\text{N}_2\text{O}_2^+$  ( $\text{M}+\text{H}$ ) $^+$  321.15975, found 321.15958.

**Ethyl 1-benzyl-3-(naphthalen-2-yl)-1H-pyrazole-5-carboxylate (4s)**

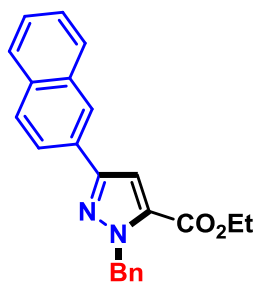

Yield 49% (35.2 mg); Pale yellow solid;  $R_f = 0.32$  (petroleum ether : ethyl acetate = 50 : 1).

$^1\text{H}$  NMR (400 MHz,  $\text{CDCl}_3$ ):  $\delta = 8.28$  (s, 1H), 8.00 (d,  $J = 8.4$  Hz, 1H), 7.88 (d,  $J = 8.4$  Hz, 2H), 7.84 – 7.80 (m, 1H), 7.49 – 7.44 (m, 2H), 7.32 – 7.23 (m, 6H), 5.85 (s, 2H), 4.32 (q,  $J = 7.2$  Hz, 2H), 1.35 (t,  $J = 7.2$  Hz, 3H).

$^{13}\text{C}$  NMR (101 MHz,  $\text{CDCl}_3$ ):  $\delta = 159.6, 150.2, 137.2, 133.54, 133.50, 133.2, 129.9, 128.5, 128.3, 128.2, 127.7, 127.6, 127.4, 126.3, 126.0, 124.3, 123.8, 108.8, 61.1, 55.1, 14.2$ .

HRMS (ESI):  $m/z$  calcd for  $C_{23}H_{21}N_2O_2^+$  (M+H)<sup>+</sup> 357.15975, found 357.15970.

### General procedure for preparation of 1,3-disubstituted pyrazoles 5:

An oven-dried Schlenk tube under argon atmosphere was charged with 2-bromobenzaldehyde **1a** (0.2 mmol, 1.0 equiv), ethyl acrylate **2a** (0.4 mmol, 2.0 equiv), phenylhydrazine **3a** (0.4 mmol, 2.0 equiv),  $Cs_2CO_3$  (0.60 mmol, 3.0 equiv), PivOH (0.8 mmol, 4.0 equiv) and DMF (2 mL). The mixture was stirred at 120 °C and the progress of the reaction was monitored by TLC. Upon completion, the resulting mixture was cooled to room temperature and added 10 mL of  $H_2O$  to quench the reaction, and then extracted with ethyl acetate (20 mL $\times$ 3). The solvents were evaporated under reduced pressure and the residue was purified by flash chromatography on silica gel to afford the products.

### 1-(2-bromobenzyl)-3-phenyl-1H-pyrazole (5a)

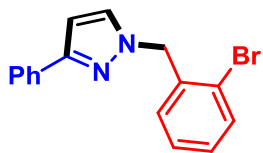

Yield 71% (44.4 mg); Pale yellow solid;  $R_f$  = 0.23 (petroleum ether : ethyl acetate = 50 : 1).

$^1H$  NMR (400 MHz,  $CDCl_3$ ):  $\delta$ =7.83 (d,  $J$ =8.0 Hz, 2H), 7.58 (d,  $J$ = 8.0 Hz, 1H), 7.46 (d,  $J$ = 2.0 Hz, 1H), 7.40 (t,  $J$ = 7.2 Hz, 2H), 7.30 (t,  $J$ = 7.2 Hz, 1H), 7.26 – 7.22 (m, 1H), 7.17 – 7.14 (m, 1H), 6.93 (d,  $J$ = 7.6 Hz, 1H), 6.61 (d,  $J$ = 2.4 Hz, 1H), 5.46 (s, 2H).

$^{13}C$  NMR (101 MHz,  $CDCl_3$ ):  $\delta$ =151.9, 136.3, 133.4, 132.7, 131.3, 129.4, 129.2, 128.6, 127.9, 127.7, 125.6, 122.7, 103.4, 55.9.

HRMS (ESI):  $m/z$  calcd for  $C_{16}H_{14}BrN_2^+$  (M+H)<sup>+</sup> 313.03349, found 313.03329.



### 1-(3-bromobenzyl)-3-phenyl-1H-pyrazole (5b)

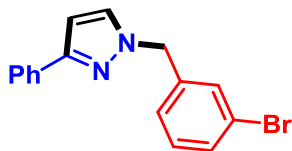

Yield 57% (35.8 mg); colorless liquid;  $R_f = 0.17$  (petroleum ether : ethyl acetate = 50 : 1).

$^1\text{H}$  NMR (400 MHz,  $\text{CDCl}_3$ ):  $\delta = 7.83 - 7.81$  (m, 2H),  $7.43 - 7.38$  (m, 5H),  $7.30$  (t,  $J = 7.2$  Hz, 1H),  $7.24 - 7.14$  (m, 2H),  $6.59$  (d,  $J = 2.4$  Hz, 1H),  $5.31$  (s, 2H).

$^{13}\text{C}$  NMR (101 MHz,  $\text{CDCl}_3$ ):  $\delta = 151.9, 138.9, 133.3, 131.1, 130.7, 130.5, 130.3, 128.6, 127.7, 126.1, 125.6, 122.8, 103.6, 55.3$ .

HRMS (ESI):  $m/z$  calcd for  $\text{C}_{16}\text{H}_{14}\text{BrN}_2^+$  ( $\text{M}+\text{H}$ ) $^+$  313.03349, found 313.03333.

### 1-(4-bromobenzyl)-3-phenyl-1H-pyrazole (5c)

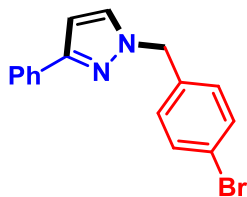

Yield 31% (19.1 mg); white solid;  $R_f = 0.16$  (petroleum ether : ethyl acetate = 50 : 1).

$^1\text{H}$  NMR (400 MHz,  $\text{CDCl}_3$ ):  $\delta = 7.82 - 7.80$  (m, 2H),  $7.46$  (d,  $J = 8.4$  Hz, 2H),  $7.41 - 7.36$  (m, 3H),  $7.32 - 7.28$  (m, 1H),  $7.11$  (d,  $J = 8.4$  Hz, 2H),  $6.58$  (d,  $J = 2.0$  Hz, 1H),  $5.30$  (s, 2H).

$^{13}\text{C}$  NMR (101 MHz,  $\text{CDCl}_3$ ):  $\delta = 151.8, 135.7, 133.3, 131.9, 130.6, 129.2, 128.6, 127.7, 125.6, 122.0, 103.5, 55.4$ .

HRMS (ESI):  $m/z$  calcd for  $\text{C}_{16}\text{H}_{14}\text{BrN}_2^+$  ( $\text{M}+\text{H}$ ) $^+$  313.03349, found 313.03360.

### 1-(2-chlorobenzyl)-3-phenyl-1H-pyrazole (5d)

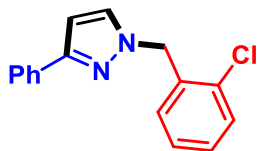

Yield 67% (35.8 mg); white solid;  $R_f = 0.20$  (petroleum ether : ethyl acetate = 50 : 1).

$^1\text{H}$  NMR (400 MHz,  $\text{CDCl}_3$ ):  $\delta = 7.82$  (d,  $J = 7.2$  Hz, 2H), 7.44 – 7.37 (m, 4H), 7.29 (t,  $J = 7.6$  Hz, 1H), 7.24 – 7.17 (m, 2H), 6.96 (dd,  $J_1 = 7.2$  Hz,  $J_2 = 0.8$  Hz, 1H), 6.60 (d,  $J = 2.4$  Hz, 1H), 5.47 (s, 2H).

$^{13}\text{C}$  NMR (101 MHz,  $\text{CDCl}_3$ ):  $\delta = 151.9, 134.6, 133.3, 132.7, 131.2, 129.4, 129.19, 129.17, 128.6, 127.6, 127.2, 125.6, 103.3, 53.4$ .

HRMS (ESI):  $m/z$  calcd for  $\text{C}_{16}\text{H}_{14}\text{ClN}_2^+$  ( $\text{M}+\text{H}$ ) $^+ 269.08400$ , found 269.08453.

### 1-(4-chlorobenzyl)-3-phenyl-1H-pyrazole (5e)

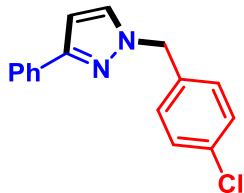

Yield 53% (28.2 mg); white solid;  $R_f = 0.16$  (petroleum ether : ethyl acetate = 50 : 1).

$^1\text{H}$  NMR (400 MHz,  $\text{CDCl}_3$ ):  $\delta = 7.81$  (d,  $J = 7.6$  Hz, 2H), 7.41 – 7.24 (m, 6H), 7.16 (d,  $J = 8.0$  Hz, 2H), 6.58 (d,  $J = 2.0$  Hz, 1H), 5.31 (s, 2H).

$^{13}\text{C}$  NMR (101 MHz,  $\text{CDCl}_3$ ):  $\delta = 151.8, 135.1, 133.8, 133.3, 130.6, 128.90, 128.89, 128.6, 127.7, 125.6, 103.5, 55.3$ .

### 1-benzyl-3-phenyl-1H-pyrazole (5f)

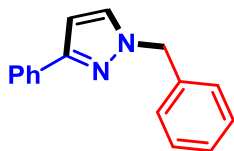

Yield 44% (20.6 mg); white solid;  $R_f = 0.33$  (petroleum ether : ethyl acetate = 50 : 1).

$^1\text{H}$  NMR (400 MHz,  $\text{CDCl}_3$ ):  $\delta = 7.82$  (d,  $J = 7.6$  Hz, 2H), 7.41 – 7.24 (m, 9H), 6.57 (d,  $J = 2.0$  Hz, 1H), 5.36 (s, 2H).

$^{13}\text{C}$  NMR (101 MHz,  $\text{CDCl}_3$ ):  $\delta = 151.6, 136.6, 133.5, 130.6, 128.8, 128.6, 128.0, 127.6, 127.5, 125.6, 103.3, 56.1$ .

### 1-(4-methylbenzyl)-3-phenyl-1H-pyrazole (5g)

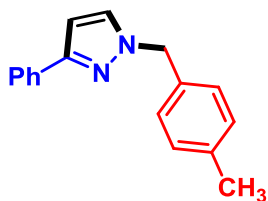

Yield 52% (25.9 mg); white solid;  $R_f = 0.34$  (petroleum ether : ethyl acetate = 50 : 1).

$^1\text{H}$  NMR (400 MHz,  $\text{CDCl}_3$ ):  $\delta = 7.81$  (d,  $J = 7.2$  Hz, 2H), 7.38 (t,  $J = 7.6$  Hz, 2H), 7.33 (d,  $J = 2.0$  Hz, 1H), 7.30 – 7.24 (m, 1H), 7.18 – 7.13 (m, 4H), 6.55 (d,  $J = 2.4$  Hz, 1H), 5.31 (s, 2H), 2.33 (s, 3H).

$^{13}\text{C}$  NMR (101 MHz,  $\text{CDCl}_3$ ):  $\delta = 151.4, 137.8, 133.6, 133.5, 130.4, 129.4, 128.5, 127.8, 127.5, 125.6, 103.2, 55.9, 21.1$ .

### 1-([1,1'-biphenyl]-4-ylmethyl)-3-phenyl-1H-pyrazole (5h)

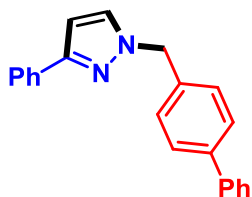

Yield 49% (30.4 mg); white solid;  $R_f = 0.15$  (petroleum ether : ethyl acetate = 50 : 1).

$^1\text{H}$  NMR (400 MHz,  $\text{CDCl}_3$ ):  $\delta=7.83$  (d,  $J = 7.2$  Hz, 2H), 7.55 (d,  $J = 8.0$  Hz, 4H), 7.44 – 7.27 (m, 9H), 6.59 (d,  $J = 2.0$  Hz, 1H), 5.38 (s, 2H).

$^{13}\text{C}$  NMR (101 MHz,  $\text{CDCl}_3$ ):  $\delta=151.6$ , 140.9, 140.5, 135.5, 133.5, 130.6, 128.8, 128.6, 128.1, 127.6, 127.5, 127.4, 127.0, 125.6, 103.3, 55.7.

HRMS (ESI):  $m/z$  calcd for  $\text{C}_{22}\text{H}_{19}\text{N}_2^+$  ( $\text{M}+\text{H}$ ) $^+$  311.15428, found 311.15417.

### 1-(4-methoxybenzyl)-3-phenyl-1H-pyrazole (5i)

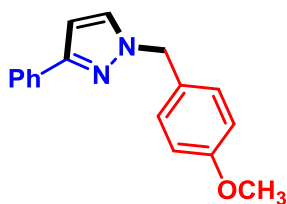

Yield 29% (15.2 mg); white solid;  $R_f = 0.20$  (petroleum ether : ethyl acetate = 50 : 1).

$^1\text{H}$  NMR (400 MHz,  $\text{CDCl}_3$ ):  $\delta=7.81$  (d,  $J = 7.2$  Hz, 2H), 7.39 (t,  $J = 7.6$  Hz, 2H), 7.32 – 7.21 (m, 4H), 6.88 (d,  $J = 8.8$  Hz, 2H), 6.55 (d,  $J = 2.0$  Hz, 1H), 5.29 (s, 2H), 3.79 (s, 3H).

$^{13}\text{C}$  NMR (101 MHz,  $\text{CDCl}_3$ ):  $\delta=159.4$ , 151.4, 133.6, 130.3, 129.3, 128.55, 128.48, 127.5, 125.6, 114.1, 103.2, 55.6, 55.3.

### 1-(3,4-dimethoxybenzyl)-3-phenyl-1H-pyrazole (5j)

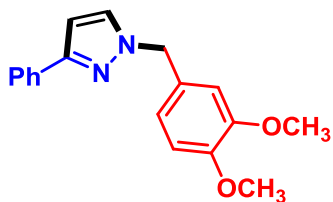

Yield 42% (24.6 mg); white solid;  $R_f = 0.25$  (petroleum ether : ethyl acetate = 50 : 1).

$^1\text{H}$  NMR (400 MHz,  $\text{CDCl}_3$ ):  $\delta=7.82$  (d,  $J = 7.2$  Hz, 2H), 7.39 (t,  $J = 7.6$  Hz, 2H), 7.33 (d,  $J = 2.0$  Hz, 1H), 7.31 (t,  $J = 7.2$  Hz, 1H), 6.83 (d,  $J = 3.6$  Hz, 3H), 6.56 (d,  $J = 2.0$  Hz, 1H), 5.29 (s, 2H), 3.86 (s, 3H), 3.83 (s, 3H).

$^{13}\text{C}$  NMR (101 MHz,  $\text{CDCl}_3$ ):  $\delta$ =151.4, 149.2, 148.8, 133.5, 130.3, 128.8, 128.5, 127.5, 125.6, 120.4, 111.11, 111.05, 103.2, 55.89, 55.87, 55.8.

HRMS (ESI):  $m/z$  calcd for  $\text{C}_{18}\text{H}_{19}\text{N}_2\text{O}_2^+$  ( $\text{M}+\text{H}$ ) $^+$  295.14410, found 295.14413.

### 3-phenyl-1-(thiophen-2-ylmethyl)-1H-pyrazole (5k)

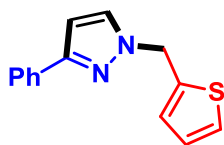

Yield 27% (13.4 mg); Pale yellow solid;  $R_f$  = 0.13 (petroleum ether : ethyl acetate = 50 : 1).

$^1\text{H}$  NMR (400 MHz,  $\text{CDCl}_3$ ):  $\delta$ =7.82 – 7.80 (m, 2H), 7.41 – 7.37 (m, 3H), 7.31 – 7.25 (m, 2H), 7.06 (d,  $J$  = 3.2 Hz, 1H), 6.99 – 6.97 (m, 1H), 6.56 (d,  $J$  = 2.4 Hz, 1H), 5.51 (s, 2H).

$^{13}\text{C}$  NMR (101 MHz,  $\text{CDCl}_3$ ):  $\delta$ =151.7, 138.3, 133.4, 130.1, 128.6, 127.6, 127.1, 127.0, 126.2, 125.6, 103.4, 50.7.

HRMS (ESI):  $m/z$  calcd for  $\text{C}_{14}\text{H}_{13}\text{N}_2\text{S}^+$  ( $\text{M}+\text{H}$ ) $^+$  241.07940, found 241.07910.

### 1-(furan-2-ylmethyl)-3-phenyl-1H-pyrazole (5l)

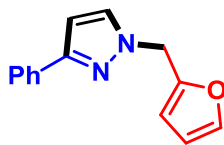

Yield 33% (14.7 mg); Brown solid;  $R_f$  = 0.15 (petroleum ether : ethyl acetate = 50 : 1).

$^1\text{H}$  NMR (400 MHz,  $\text{CDCl}_3$ ):  $\delta$ =7.80 (d,  $J$  = 7.6 Hz, 2H), 7.41 – 7.36 (m, 4H), 7.31 – 7.25 (m, 1H), 6.56 (d,  $J$  = 2.0 Hz, 1H), 6.39 – 6.36 (m, 2H), 5.33 (s, 2H).

$^{13}\text{C}$  NMR (101 MHz,  $\text{CDCl}_3$ ):  $\delta$ =151.6, 149.2, 143.0, 133.4, 130.3, 128.5, 127.6, 125.6, 110.6, 109.3, 103.3, 48.8.

HRMS (ESI):  $m/z$  calcd for  $\text{C}_{14}\text{H}_{13}\text{N}_2\text{O}^+$  ( $\text{M}+\text{H}$ ) $^+$  225.10224, found 225.10175.

**1-benzyl-3-(2-chlorophenyl)-1H-pyrazole (5m)**

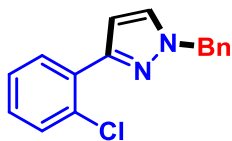

Yield 50% (26.7 mg); Pale yellow liquid;  $R_f = 0.22$  (petroleum ether : ethyl acetate = 50 : 1).

$^1\text{H}$  NMR (400 MHz,  $\text{CDCl}_3$ ):  $\delta=7.83$  (d,  $J = 7.6$  Hz, 1H), 7.44 – 7.21 (m, 9H), 6.80 (d,  $J = 1.6$  Hz, 1H), 5.37 (s, 2H).

$^{13}\text{C}$  NMR (101 MHz,  $\text{CDCl}_3$ ):  $\delta=149.0$ , 136.4, 132.4, 132.2, 130.6, 130.2, 129.7, 128.8, 128.6, 128.0, 127.7, 126.8, 107.3, 56.1.

HRMS (ESI):  $m/z$  calcd for  $\text{C}_{16}\text{H}_{14}\text{ClN}_2^+$  ( $\text{M}+\text{H}$ ) $^+$  269.08400, found 269.08392.

**1-benzyl-3-(3-chlorophenyl)-1H-pyrazole (5n)**

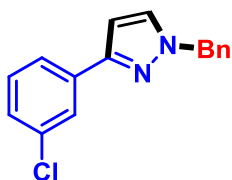

Yield 65% (34.6 mg); colorless liquid;  $R_f = 0.23$  (petroleum ether : ethyl acetate = 50 : 1).

$^1\text{H}$  NMR (400 MHz,  $\text{CDCl}_3$ ):  $\delta=7.82$  (s, 1H), 7.68 (d,  $J = 7.6$  Hz, 1H), 7.37 – 7.24 (m, 8H), 6.56 (s, 1H), 5.35 (s, 2H).

$^{13}\text{C}$  NMR (101 MHz,  $\text{CDCl}_3$ ):  $\delta=150.2$ , 136.3, 135.3, 134.5, 130.8, 129.8, 128.8, 128.1, 127.7, 127.5, 125.7, 123.7, 103.5, 56.2.

HRMS (ESI):  $m/z$  calcd for  $\text{C}_{16}\text{H}_{14}\text{ClN}_2^+$  ( $\text{M}+\text{H}$ ) $^+$  269.08400, found 269.08426.

**1-benzyl-3-(4-chlorophenyl)-1H-pyrazole (5o)**

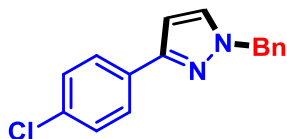

Yield 67% (34.0 mg); Pale yellow liquid;  $R_f = 0.26$  (petroleum ether : ethyl acetate = 50 : 1).

$^1\text{H NMR}$  (400 MHz,  $\text{CDCl}_3$ ):  $\delta = 7.75 - 7.73$  (m, 2H), 7.36 – 7.30 (m, 6H), 7.24 (d,  $J = 6.4$  Hz, 2H), 6.54 (d,  $J = 2.4$  Hz, 1H), 5.34 (s, 2H).

$^{13}\text{C NMR}$  (101 MHz,  $\text{CDCl}_3$ ):  $\delta = 150.4, 136.3, 133.2, 132.0, 130.8, 128.8, 128.7, 128.0, 127.6, 126.8, 103.2, 56.1$ .

HRMS (ESI):  $m/z$  calcd for  $\text{C}_{16}\text{H}_{14}\text{ClN}_2^+$  ( $\text{M}+\text{H}$ ) $^+$  269.08400, found 269.08408.

**1-benzyl-3-(4-bromophenyl)-1H-pyrazole (5p)**

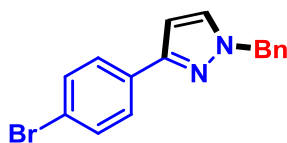

Yield 60% (37.3 mg); white solid;  $R_f = 0.21$  (petroleum ether : ethyl acetate = 50 : 1).

$^1\text{H NMR}$  (400 MHz,  $\text{CDCl}_3$ ):  $\delta = 7.68$  (d,  $J = 8.4$  Hz, 2H), 7.49 (d,  $J = 8.4$  Hz, 2H), 7.36 – 7.22 (m, 6H), 6.53 (d,  $J = 2.4$  Hz, 1H), 5.33 (s, 2H).

$^{13}\text{C NMR}$  (101 MHz,  $\text{CDCl}_3$ ):  $\delta = 150.4, 136.3, 132.5, 131.6, 130.8, 128.8, 128.0, 127.6, 127.1, 121.4, 103.3, 56.1$ .

HRMS (ESI):  $m/z$  calcd for  $\text{C}_{16}\text{H}_{14}\text{BrN}_2^+$  ( $\text{M}+\text{H}$ ) $^+$  313.03349, found 313.03357.

#### 4-(1-benzyl-1H-pyrazol-3-yl)benzonitrile (5q)

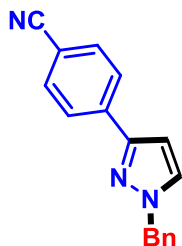

Yield 56% (29.1 mg); white solid;  $R_f = 0.10$  (petroleum ether : ethyl acetate = 50 : 1).

$^1\text{H}$  NMR (400 MHz,  $\text{CDCl}_3$ ):  $\delta = 7.91$  (d,  $J = 8.4$  Hz, 2H), 7.66 (d,  $J = 8.4$  Hz, 2H), 7.41 – 7.25 (m, 6H), 6.63 (d,  $J = 2.4$  Hz, 1H), 5.36 (s, 2H).

$^{13}\text{C}$  NMR (101 MHz,  $\text{CDCl}_3$ ):  $\delta = 149.5, 137.9, 136.0, 132.4, 131.1, 128.8, 128.2, 127.7, 125.9, 119.1, 110.7, 104.0, 56.3$ .

HRMS (ESI):  $m/z$  calcd for  $\text{C}_{17}\text{H}_{14}\text{N}_3^+$  ( $\text{M}+\text{H}$ ) $^+$  260.11822, found 260.11801.

#### 1-benzyl-3-(p-tolyl)-1H-pyrazole (5r)

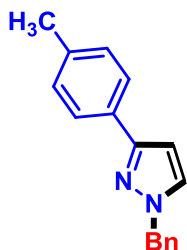

Yield 55% (27.2 mg); Pale yellow solid;  $R_f = 0.14$  (petroleum ether : ethyl acetate = 50 : 1).

$^1\text{H}$  NMR (400 MHz,  $\text{CDCl}_3$ ):  $\delta = 7.71$  (d,  $J = 8.0$  Hz, 2H), 7.35 – 7.18 (m, 8H), 6.53 (d,  $J = 2.0$  Hz, 1H), 5.34 (s, 2H), 2.36 (s, 3H).

$^{13}\text{C}$  NMR (101 MHz,  $\text{CDCl}_3$ ):  $\delta = 151.6, 137.2, 136.6, 130.7, 130.5, 129.2, 128.7, 127.9, 127.6, 125.5, 103.0, 56.0, 21.2$ .

HRMS (ESI):  $m/z$  calcd for  $\text{C}_{17}\text{H}_{17}\text{N}_2^+$  ( $\text{M}+\text{H}$ ) $^+$  249.13862, found 249.13832.



**1-benzyl-3-(m-tolyl)-1H-pyrazole (5s)**

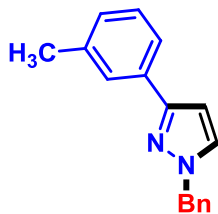

Yield 47% (23.1 mg); Pale yellow liquid;  $R_f = 0.20$  (petroleum ether : ethyl acetate = 50 :

1)

$^1\text{H}$  NMR (400 MHz,  $\text{CDCl}_3$ ):  $\delta=7.68$  (s, 1H), 7.61 – 7.59 (m, 1H), 7.34 – 7.23 (m, 7H), 7.12 – 7.11 (m, 1H), 6.564 – 6.556 (m, 1H), 5.36 (d,  $J = 3.2$  Hz, 2H), 2.39 (d,  $J = 2.8$  Hz, 3H).

$^{13}\text{C}$  NMR (101 MHz,  $\text{CDCl}_3$ ):  $\delta=151.7$ , 138.2, 136.6, 133.4, 130.5, 128.7, 128.5, 128.3, 127.9, 127.6, 126.2, 122.8, 103.3, 56.0, 21.4.

HRMS (ESI):  $m/z$  calcd for  $\text{C}_{17}\text{H}_{17}\text{N}_2^+$  ( $\text{M}+\text{H}$ ) $^+$  249.13862, found 249.13837.

**1-benzyl-3-(naphthalen-2-yl)-1H-pyrazole (5t)**

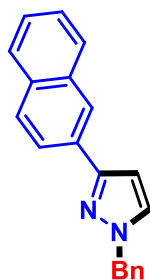

Yield 51% (30.7 mg); white solid;  $R_f = 0.20$  (petroleum ether : ethyl acetate = 50 : 1).

$^1\text{H}$  NMR (400 MHz,  $\text{CDCl}_3$ ):  $\delta=8.26$  (s, 1H), 7.99 (d,  $J = 8.4$  Hz, 1H), 7.87 – 7.80 (m, 3H), 7.47 – 7.22 (m, 8H), 6.69 (d,  $J = 2.4$  Hz, 1H), 5.38 (s, 2H).

$^{13}\text{C}$  NMR (101 MHz,  $\text{CDCl}_3$ ):  $\delta=151.5$ , 136.5, 133.6, 133.0, 130.9, 130.7, 128.8, 128.2, 128.1, 128.0, 127.7, 126.1, 125.7, 124.1, 124.0, 103.6, 56.1.

### 1-benzyl-3-(4-methoxyphenyl)-1H-pyrazole (5u)

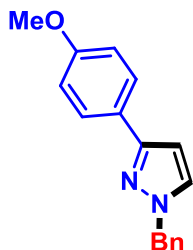

Yield 43% (22.9 mg); Pale yellow solid;  $R_f = 0.05$  (petroleum ether : ethyl acetate = 50 : 1).

$^1\text{H}$  NMR (400 MHz,  $\text{CDCl}_3$ ):  $\delta=7.74$  (d,  $J = 8.4$  Hz, 2H), 7.34 – 7.23 (m, 6H), 6.93 (d,  $J = 8.4$  Hz, 2H), 6.50 (d,  $J = 2.0$  Hz, 1H), 5.34 (s, 2H), 3.83 (s, 3H).

$^{13}\text{C}$  NMR (101 MHz,  $\text{CDCl}_3$ ):  $\delta=159.2$ , 151.4, 136.7, 130.5, 128.7, 127.9, 127.6, 126.9, 126.4, 114.0, 102.8, 56.0, 55.3.

HRMS (ESI):  $m/z$  calcd for  $\text{C}_{17}\text{H}_{17}\text{N}_2\text{O}^+$  ( $\text{M}+\text{H}$ ) $^+$  265.13354, found 265.13315.

### 3-(benzo[d][1,3]dioxol-5-yl)-1-benzyl-1H-pyrazole (5v)

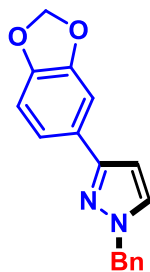

Yield 44% (24.4 mg); white solid;  $R_f = 0.18$  (petroleum ether : ethyl acetate = 50 : 1).

$^1\text{H}$  NMR (400 MHz,  $\text{CDCl}_3$ ):  $\delta=7.36 - 7.23$  (m, 8H), 6.83 (d,  $J = 8.0$  Hz, 1H), 6.46 (d,  $J = 2.0$  Hz, 1H), 5.95 (s, 2H), 5.32 (s, 2H).

$^{13}\text{C}$  NMR (101 MHz,  $\text{CDCl}_3$ ):  $\delta=151.3$ , 147.9, 147.1, 136.6, 130.6, 128.7, 127.95, 127.90, 127.6, 119.2, 108.4, 106.3, 102.9, 100.9, 56.0.

HRMS (ESI):  $m/z$  calcd for  $\text{C}_{17}\text{H}_{15}\text{N}_2\text{O}_2^+$  ( $\text{M}+\text{H}$ ) $^+$  279.11280, found 279.11264.

**1-benzyl-3-(thiophen-2-yl)-1H-pyrazole (5w)**

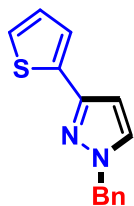

Yield 49% (23.7 mg), yellow solid;  $R_f = 0.19$  (petroleum ether : ethyl acetate = 50 : 1).

$^1\text{H}$  NMR (400 MHz,  $\text{CDCl}_3$ ):  $\delta=7.36 - 7.21$  (m, 8H), 7.05 – 7.03 (m, 1H), 6.47 (d,  $J = 2.4$  Hz, 1H), 5.32 (s, 2H).

$^{13}\text{C}$  NMR (101 MHz,  $\text{CDCl}_3$ ):  $\delta=146.7, 136.7, 136.3, 130.6, 128.8, 128.0, 127.7, 127.4, 124.2, 123.5, 103.4, 56.0$ .

**ethyl 3-phenyl-1H-pyrazole-5-carboxylate (6)**

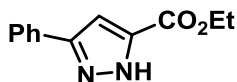

Yield 51% (43.8 mg); white solid;  $R_f = 0.23$  (petroleum ether : ethyl acetate = 5 : 1).

$^1\text{H}$  NMR (400 MHz,  $\text{CDCl}_3$ ):  $\delta=12.25$  (s, 1H), 7.74 (d,  $J = 7.6$  Hz, 2H), 7.41 (t,  $J = 7.6$  Hz, 2H), 7.34 (t,  $J = 7.2$  Hz, 1H), 7.06 (s, 1H), 4.32 (q,  $J = 7.2$  Hz, 2H), 1.32 (t,  $J = 7.2$  Hz, 3H).

$^{13}\text{C}$  NMR (101 MHz,  $\text{CDCl}_3$ ):  $\delta= 161.0, 147.9, 140.2, 130.1, 128.8, 128.5, 125.6, 105.1, 61.0, 14.0$ .

## Crystal data of product 4a

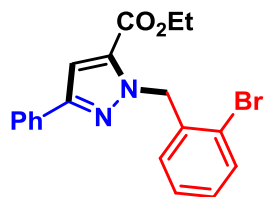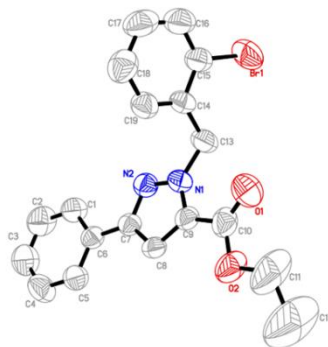

---

Bond precision: C-C = 0.0067 Å                      Wavelength=0.71073

Cell:                      a=10.495 (2)                      b=21.897 (4)                      c=7.8420 (16)  
                                alpha=90                      beta=96.57 (3)                      gamma=90

Temperature:                      293 K

|                        | Calculated       | Reported         |
|------------------------|------------------|------------------|
| Volume                 | 1790.3 (6)       | 1790.3 (6)       |
| Space group            | P 21/c           | P21/c            |
| Hall group             | -P 2ybc          | ?                |
| Moiety formula         | C19 H17 Br N2 O2 | ?                |
| Sum formula            | C19 H17 Br N2 O2 | C19 H17 Br N2 O2 |
| Mr                     | 385.25           | 385.26           |
| Dx, g cm <sup>-3</sup> | 1.429            | 1.429            |
| Z                      | 4                | 4                |
| Mu (mm <sup>-1</sup> ) | 2.309            | 2.309            |
| F000                   | 784.0            | 784.0            |
| F000'                  | 783.15           |                  |
| h, k, lmax             | 13, 28, 10       | 13, 28, 10       |
| Nref                   | 4104             | 4093             |
| Tmin, Tmax             | 0.343, 0.500     | 0.632, 1.000     |
| Tmin'                  | 0.152            |                  |

Correction method= # Reported T Limits: Tmin=0.632 Tmax=1.000  
AbsCorr = MULTI-SCAN

Data completeness= 0.997                      Theta(max)= 27.480

R(reflections)= 0.0709 ( 2584)                      wR2(reflections)= 0.2131 ( 4093)

S = 1.198                      Npar= 218

---

# NMR Spectra

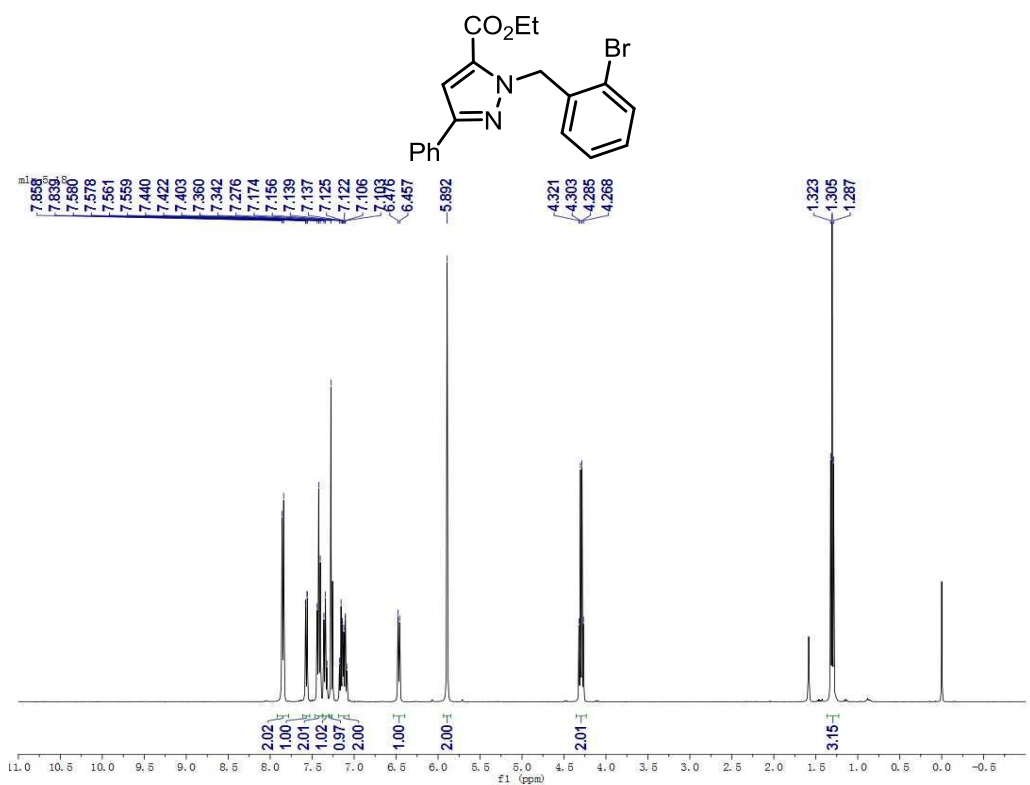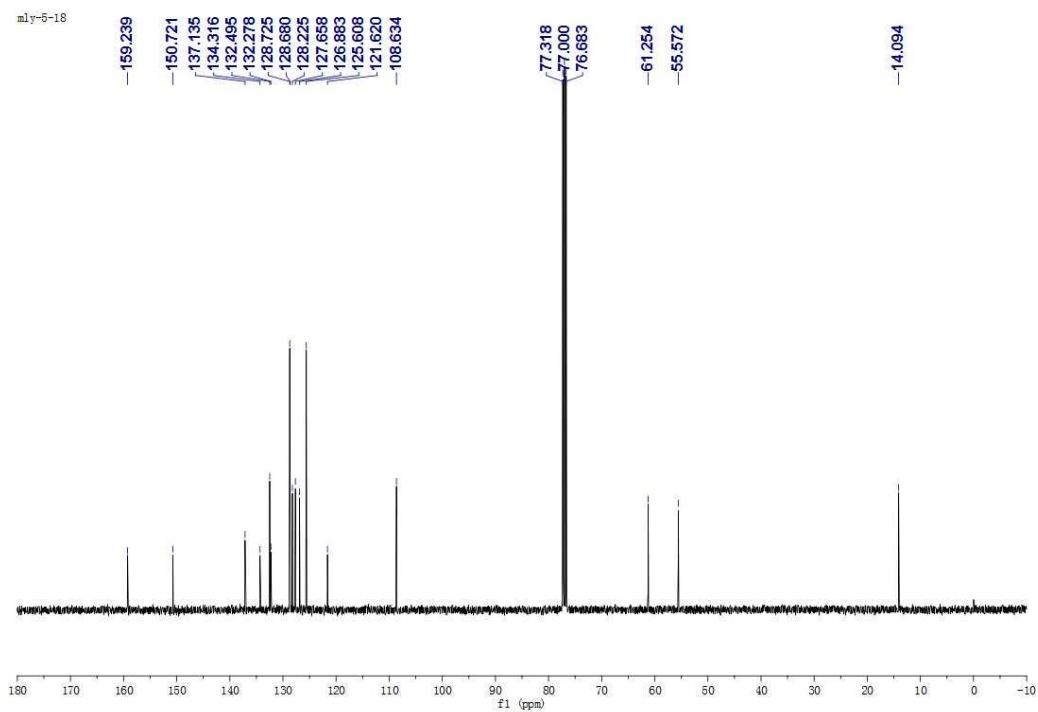

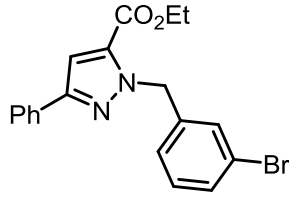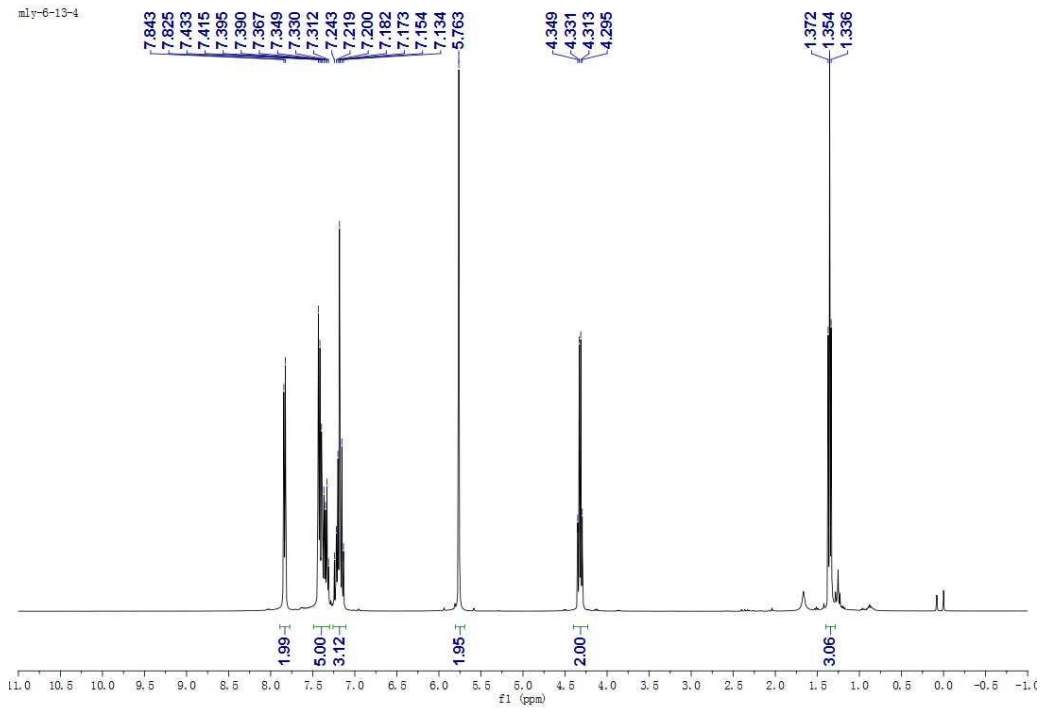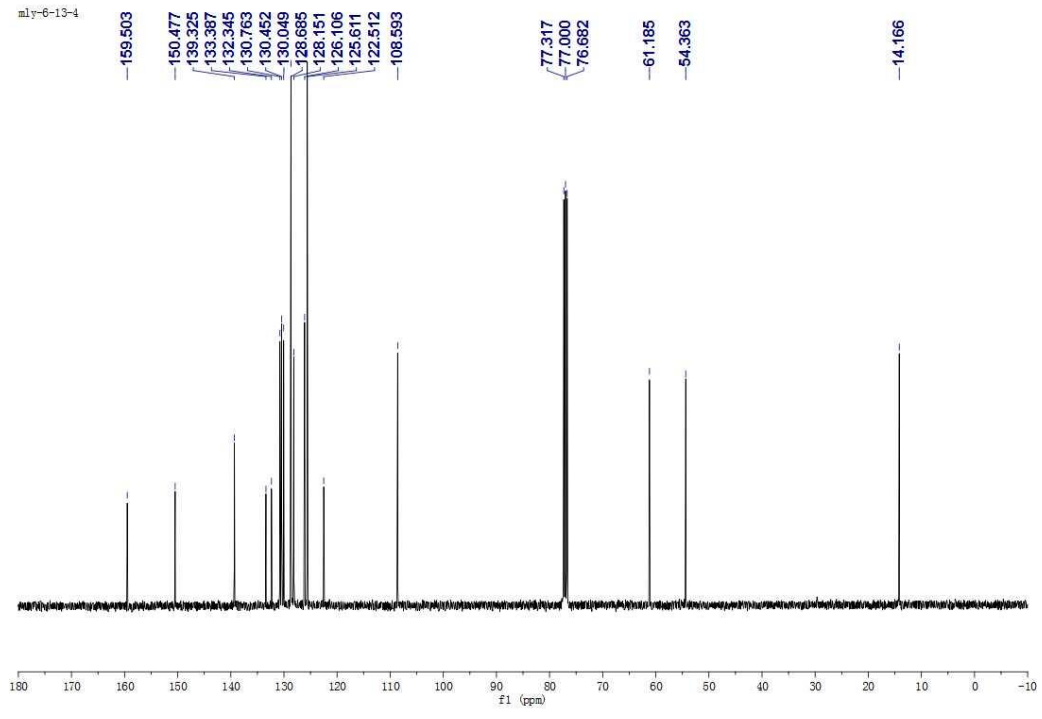

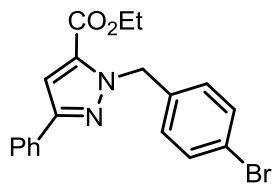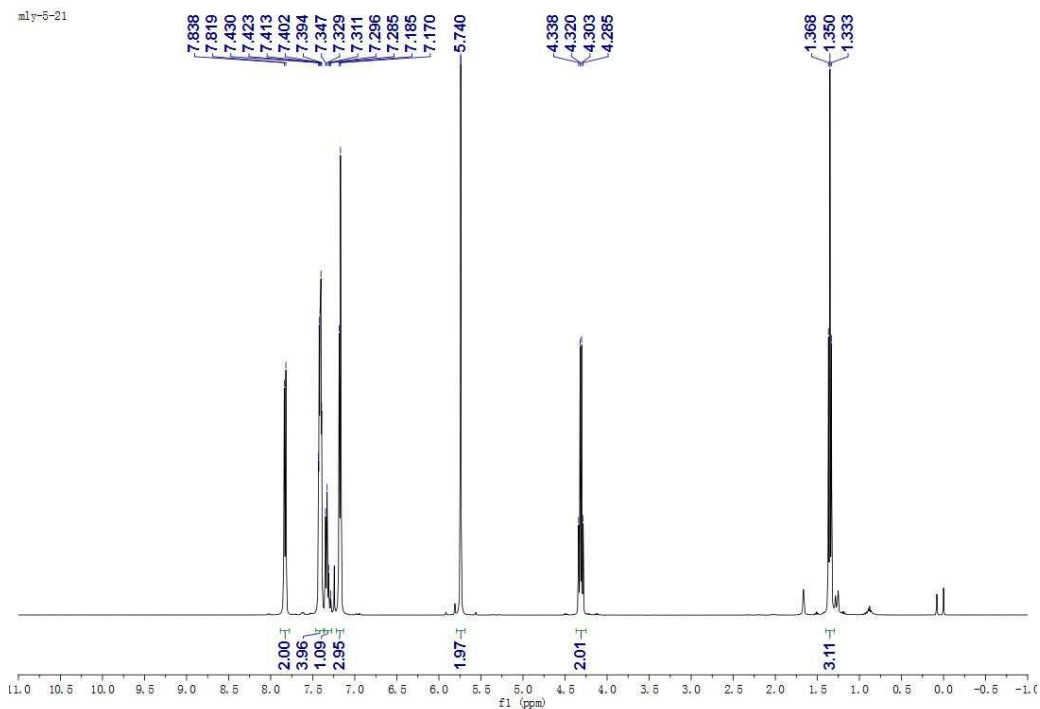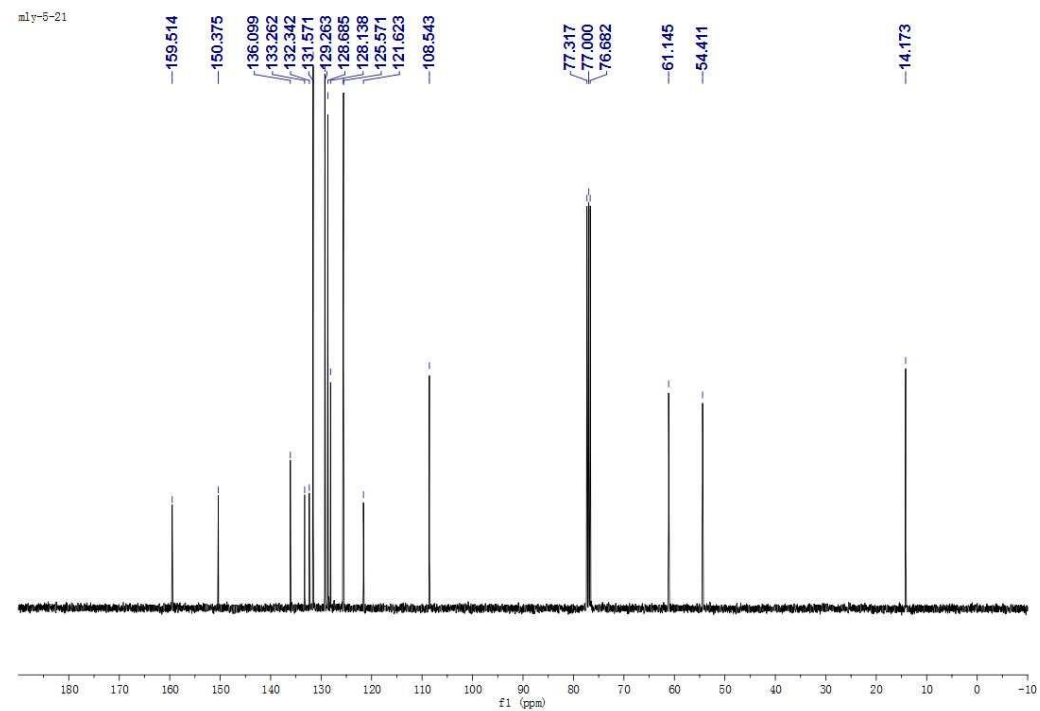

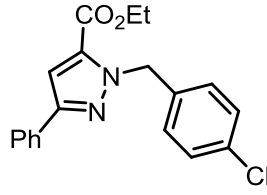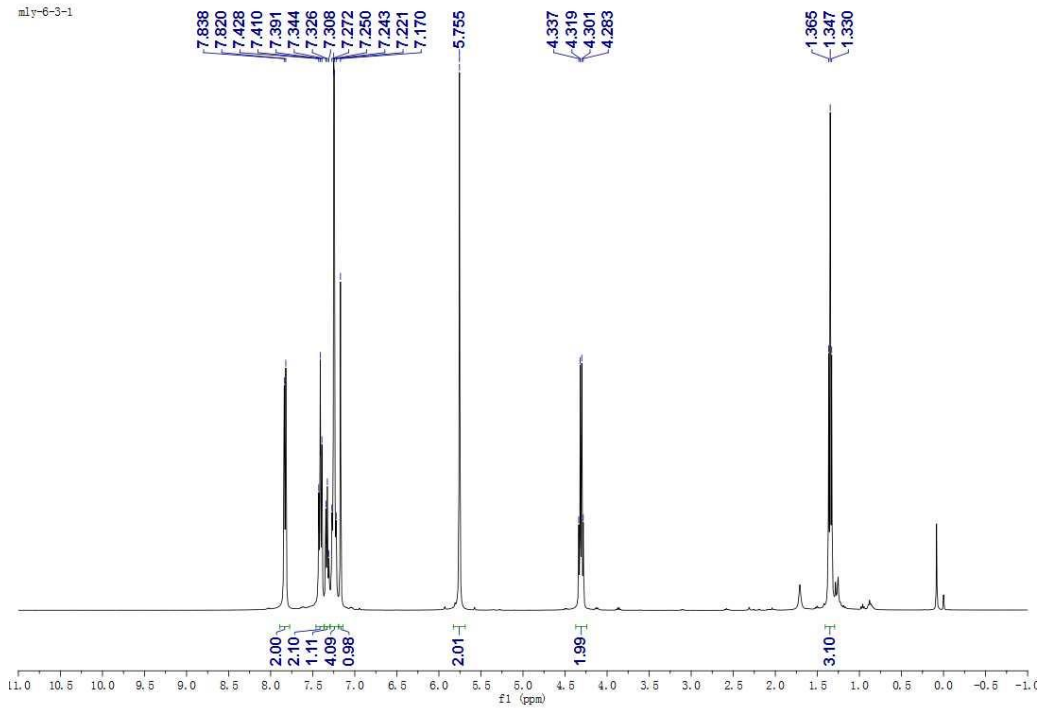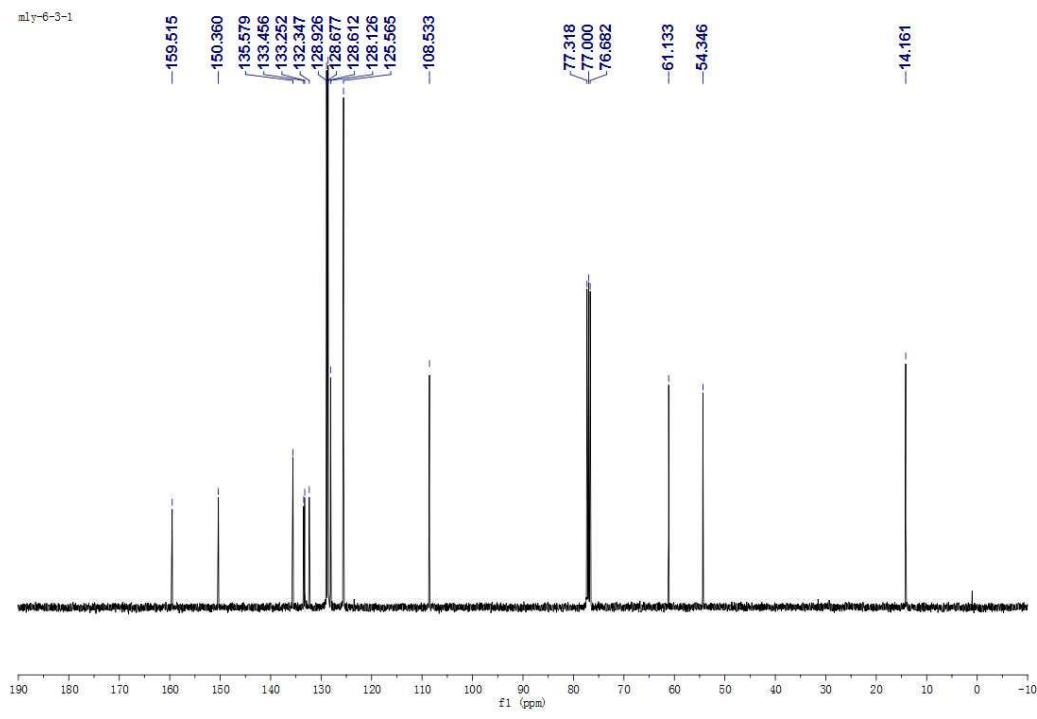



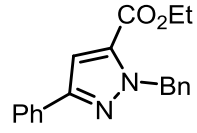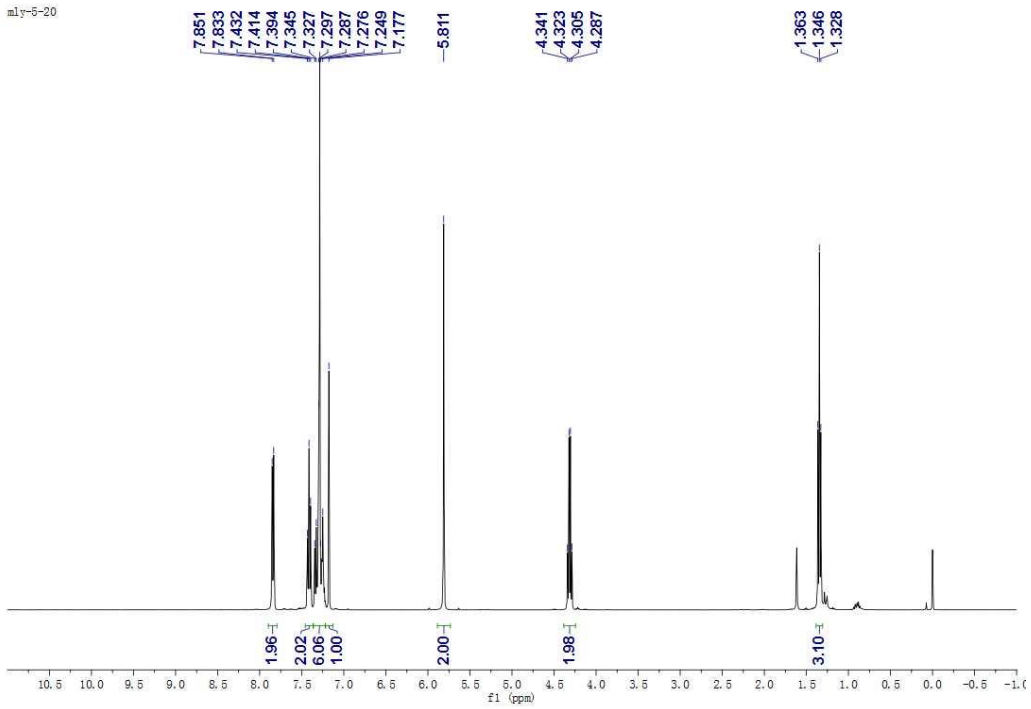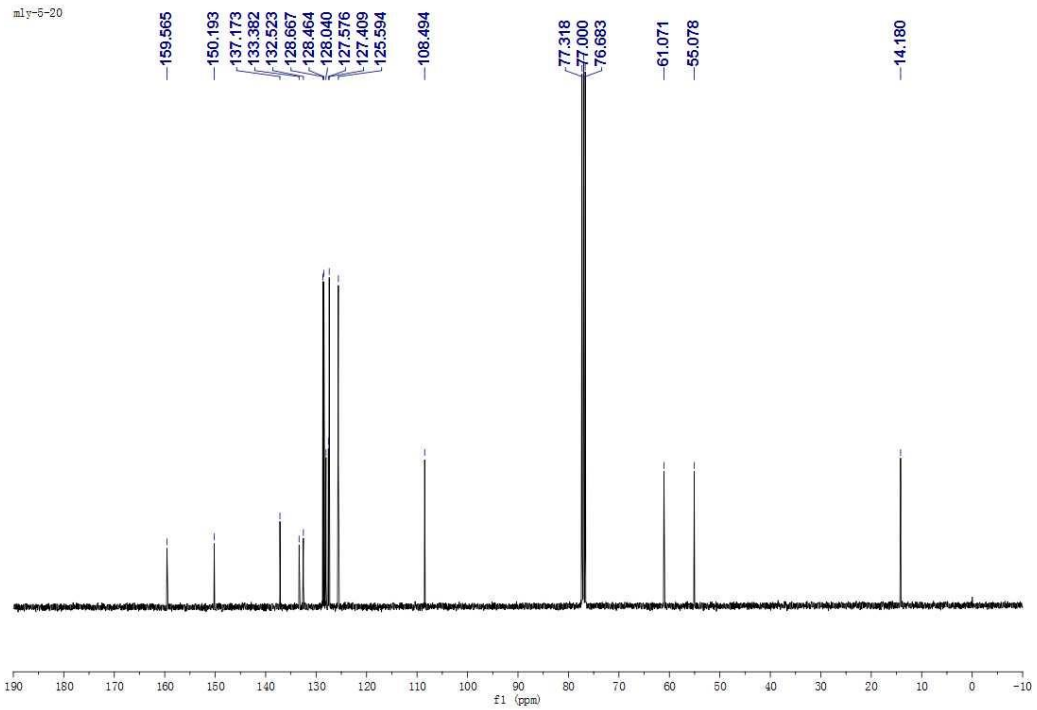

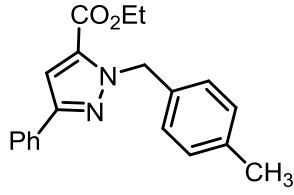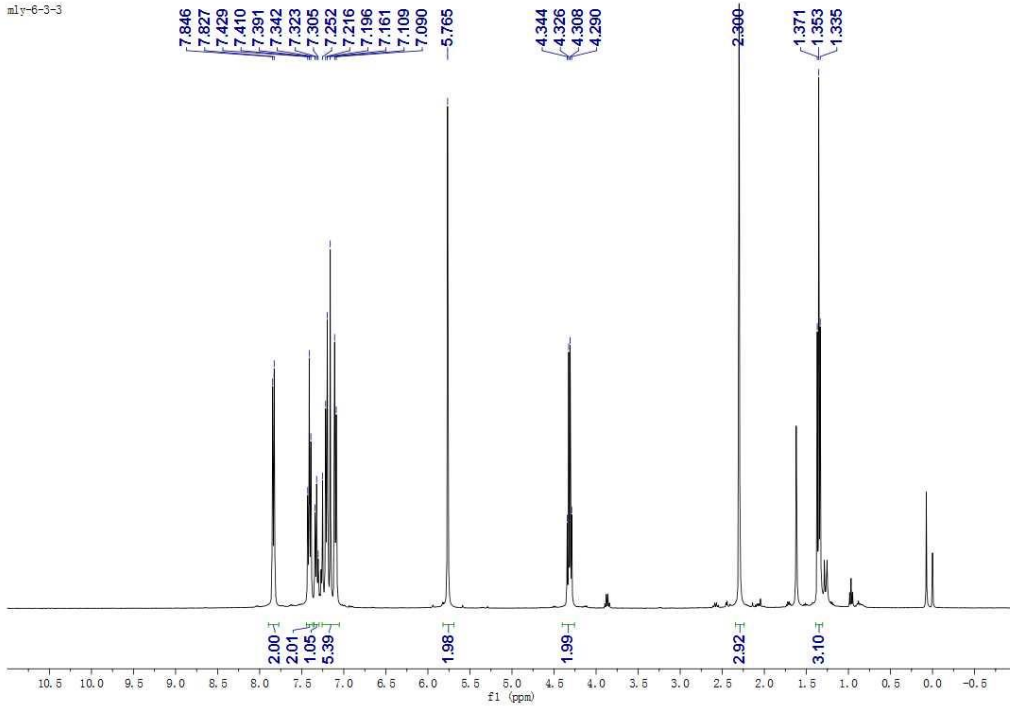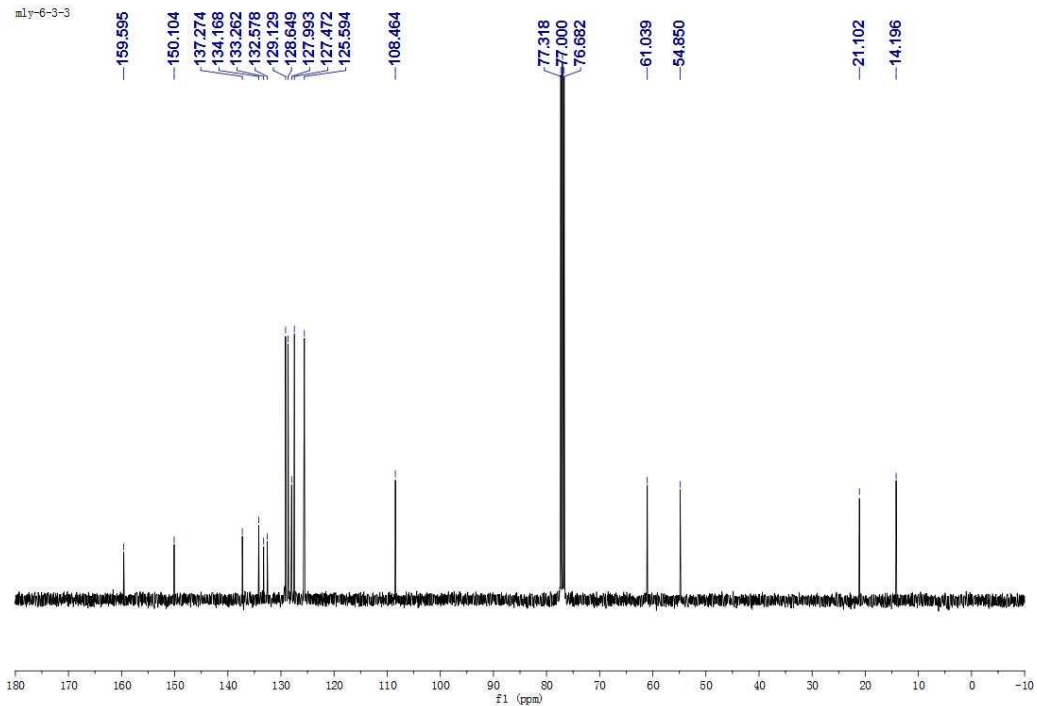

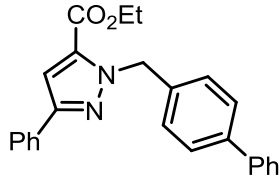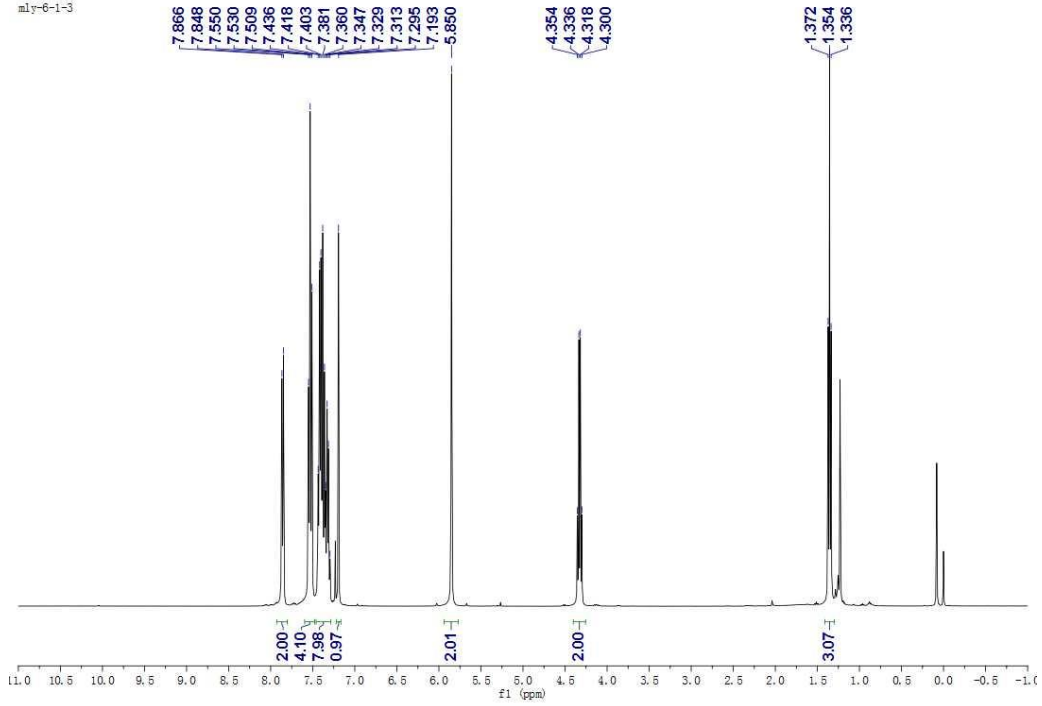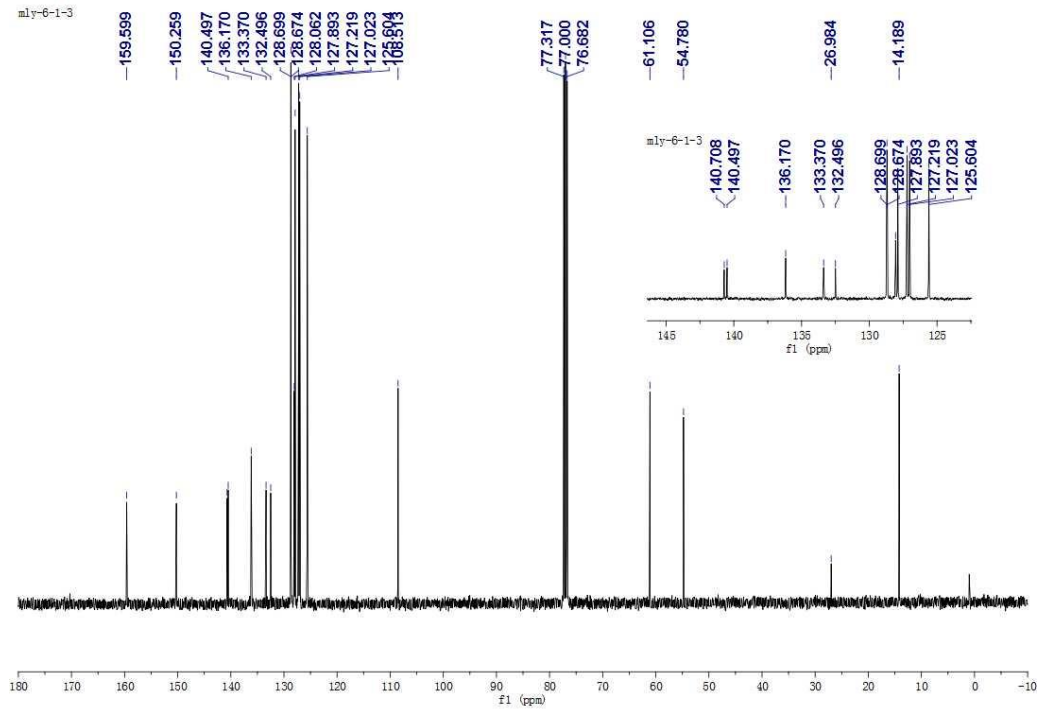

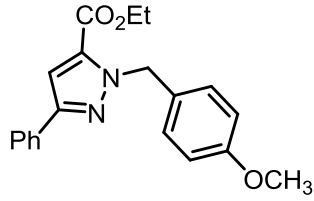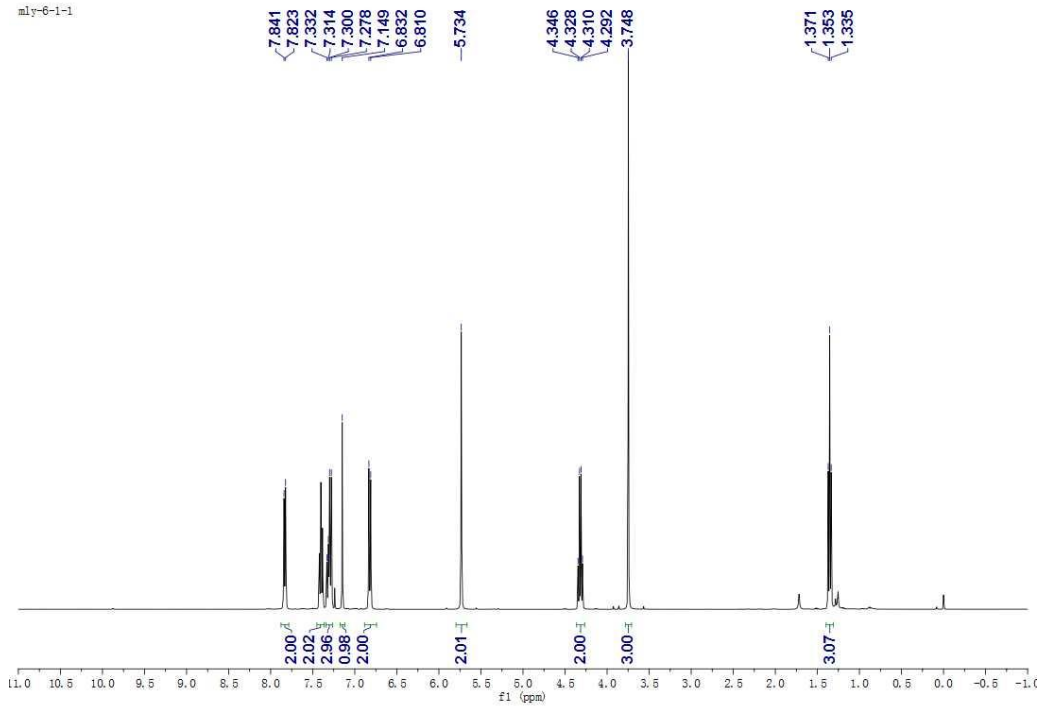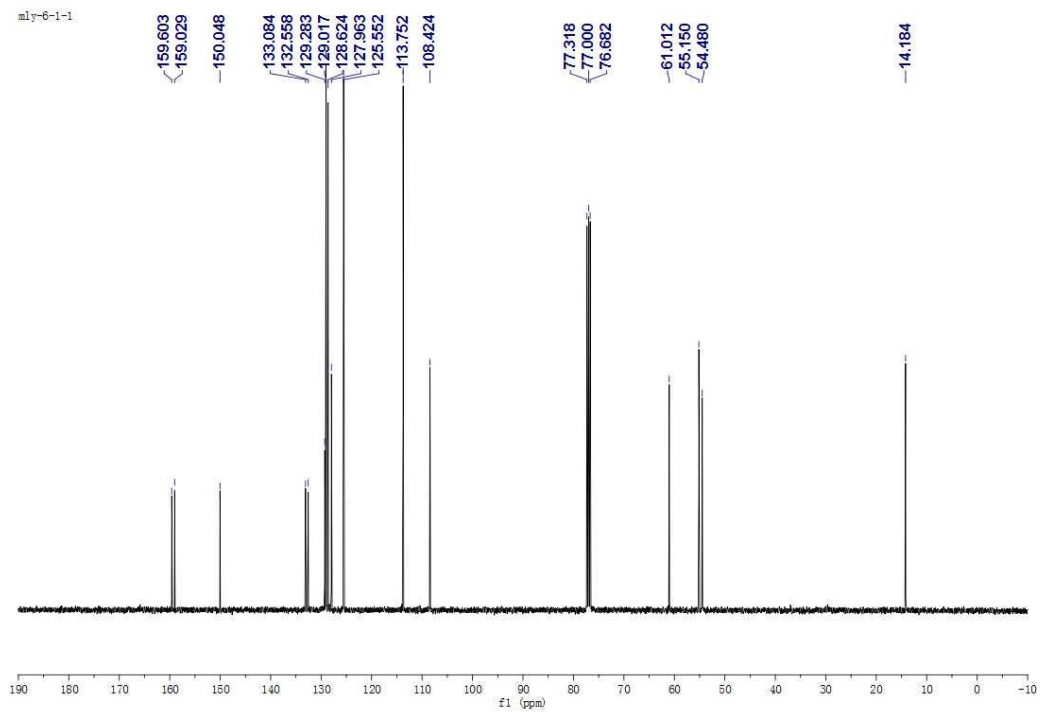

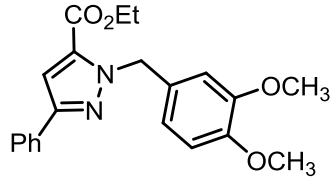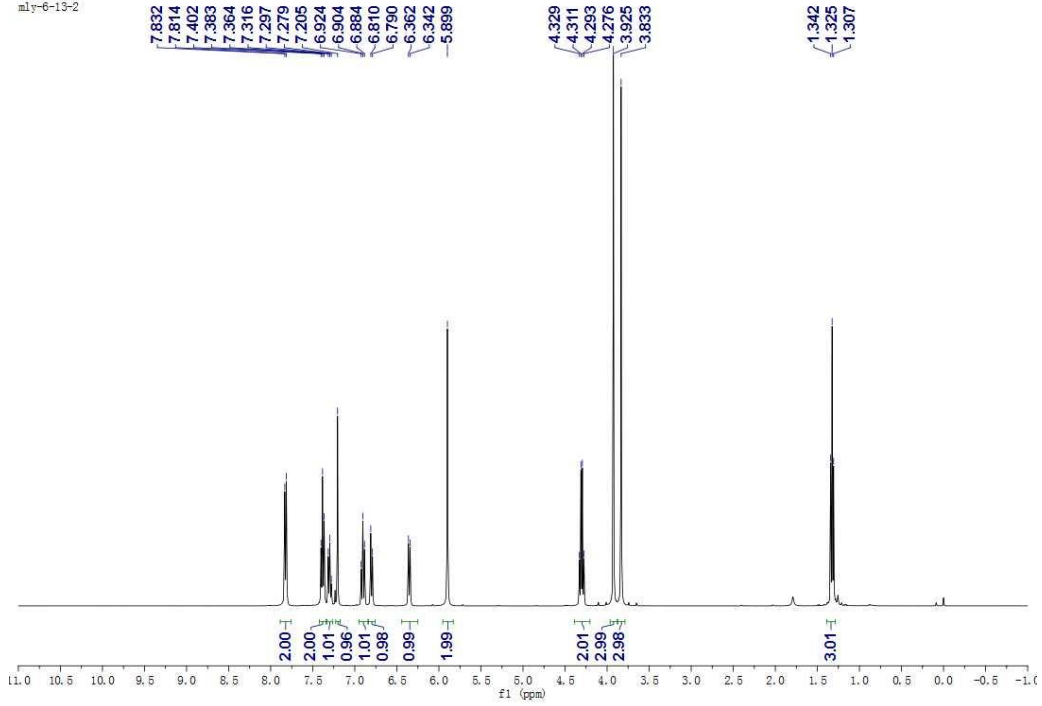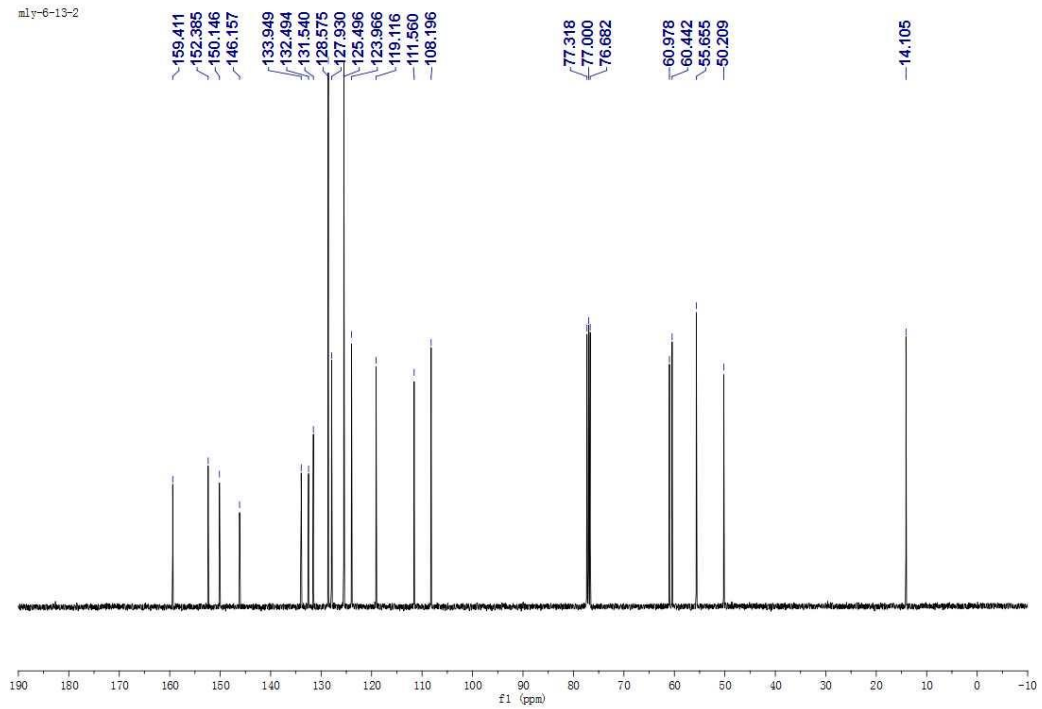

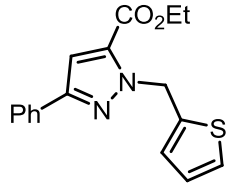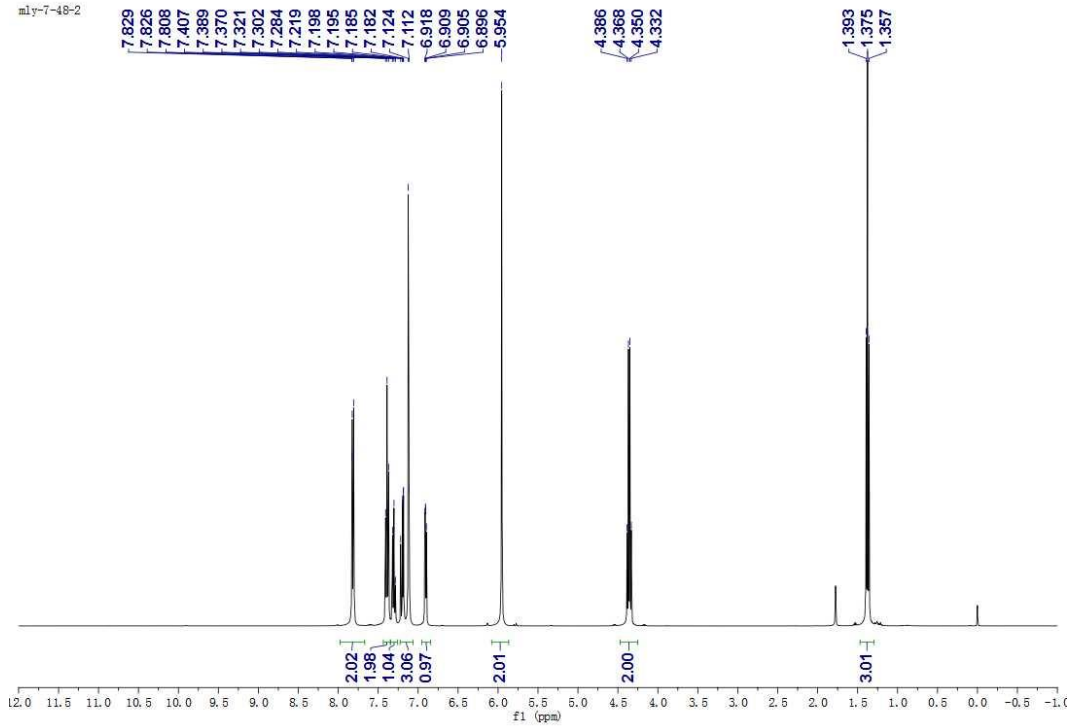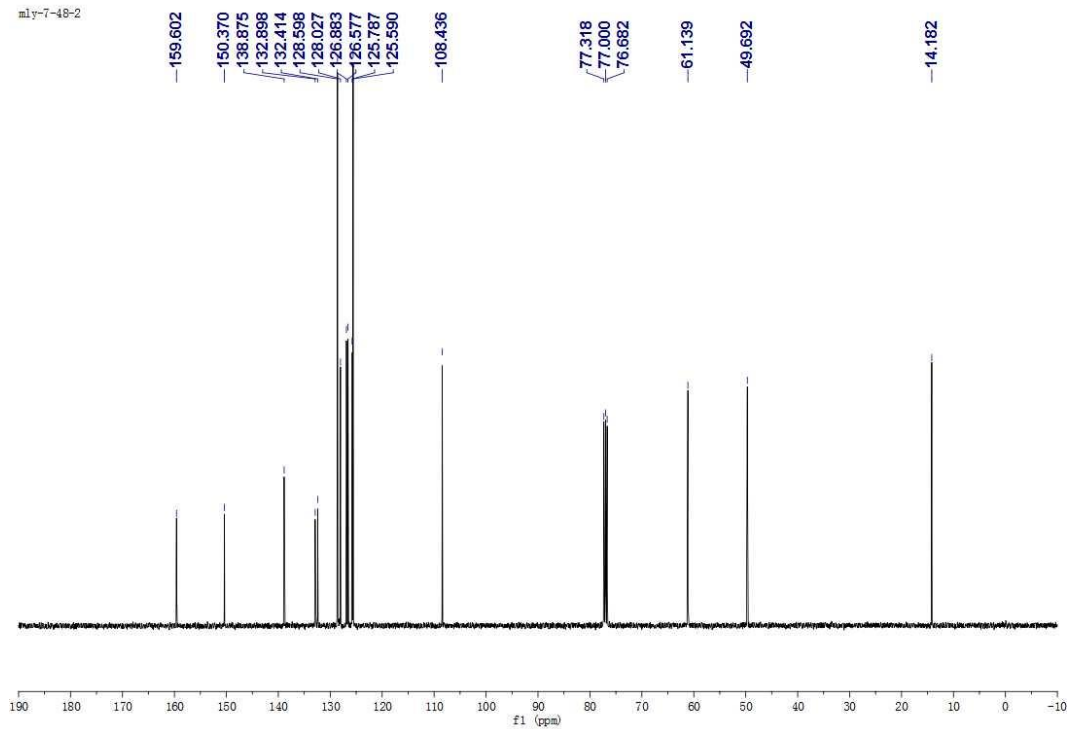

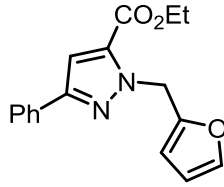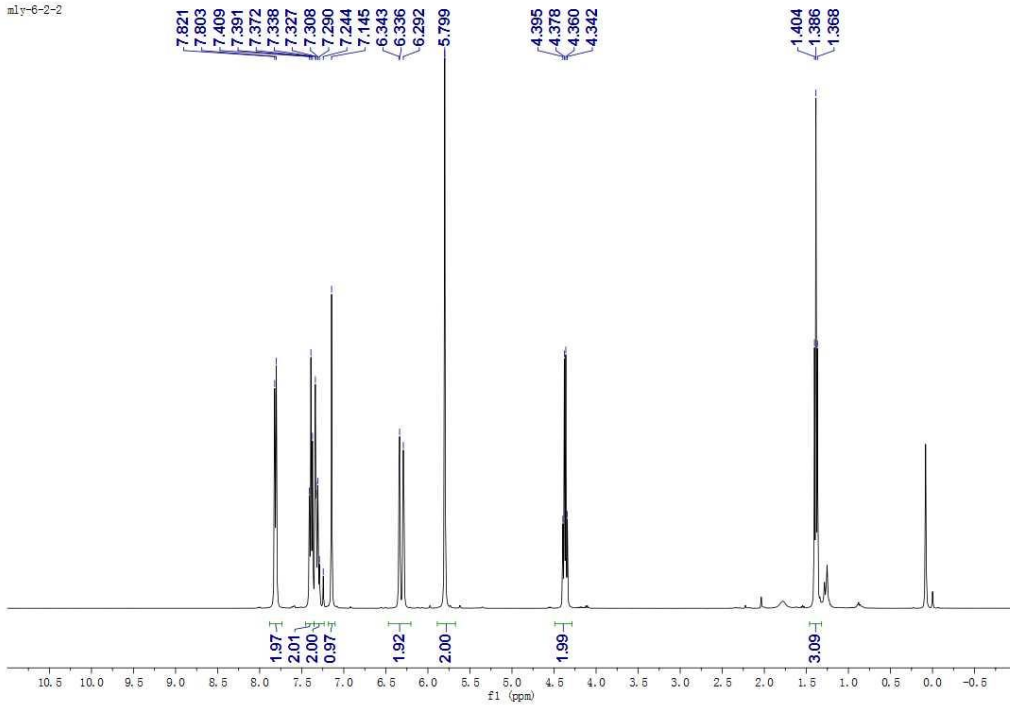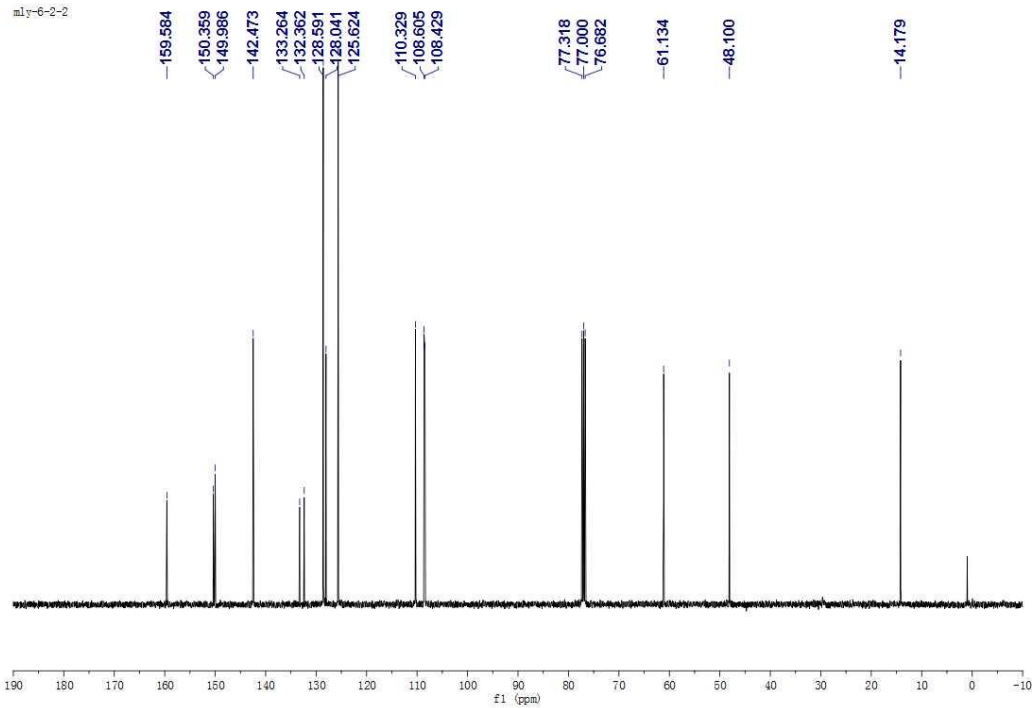

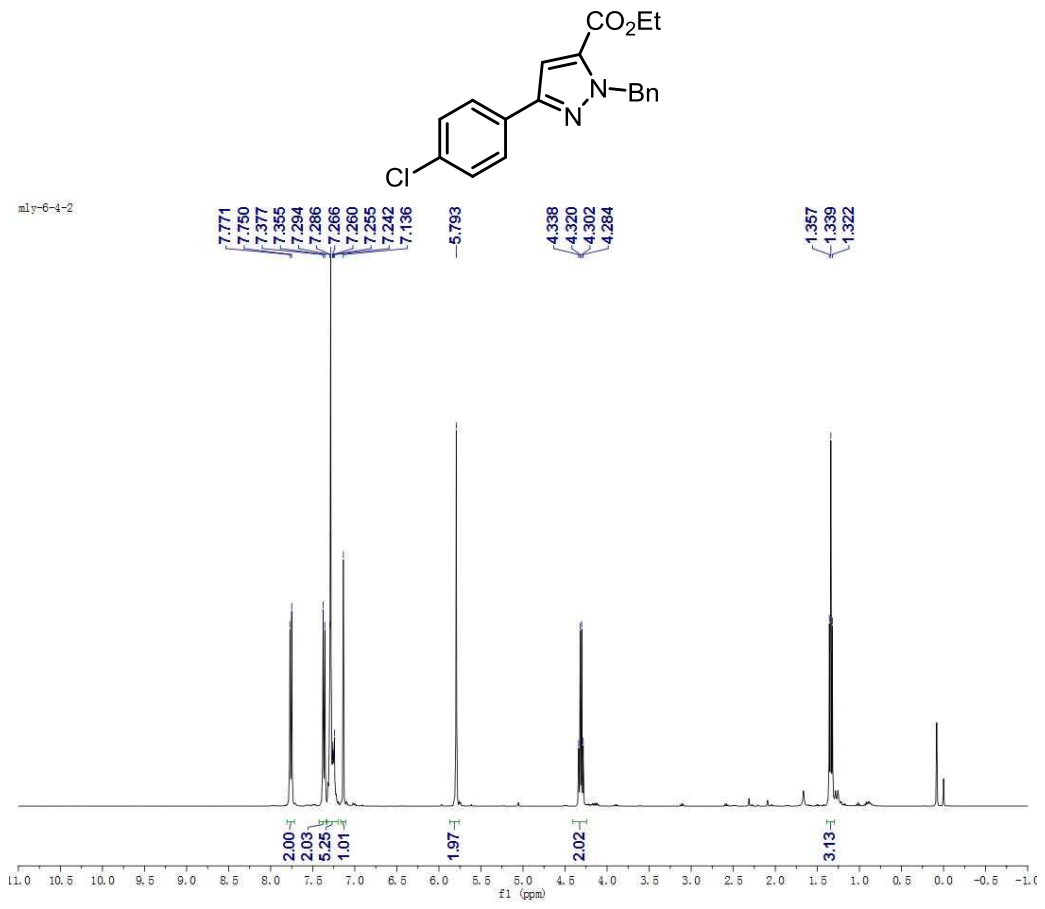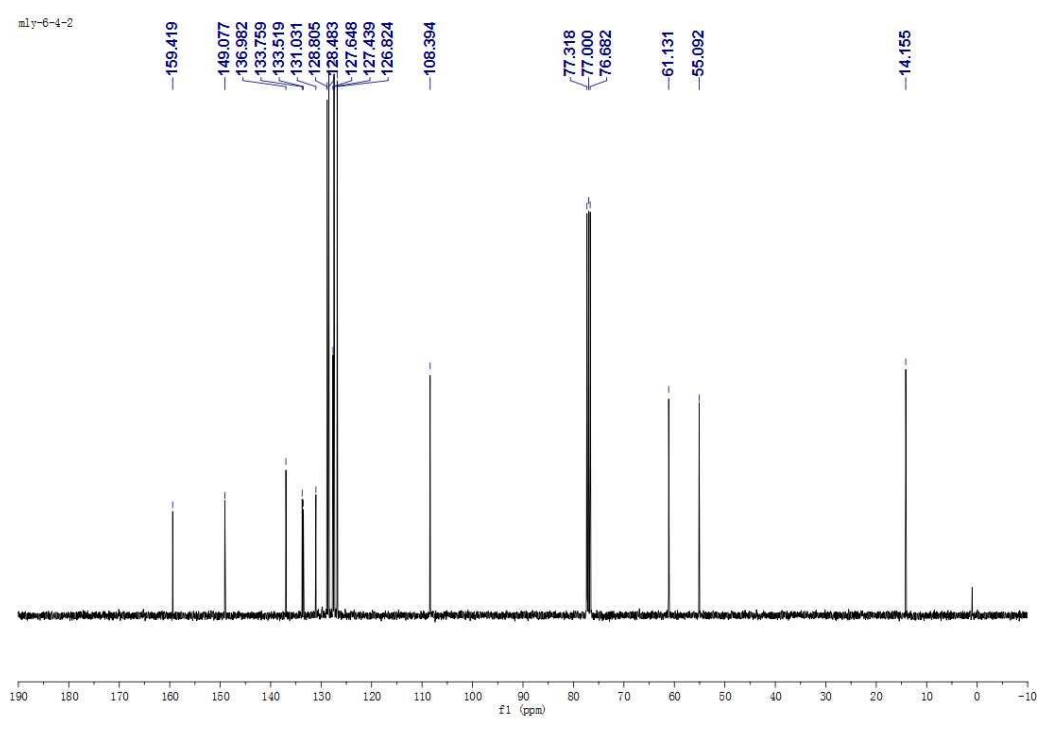



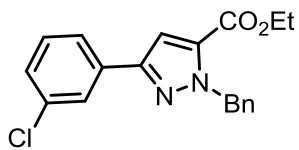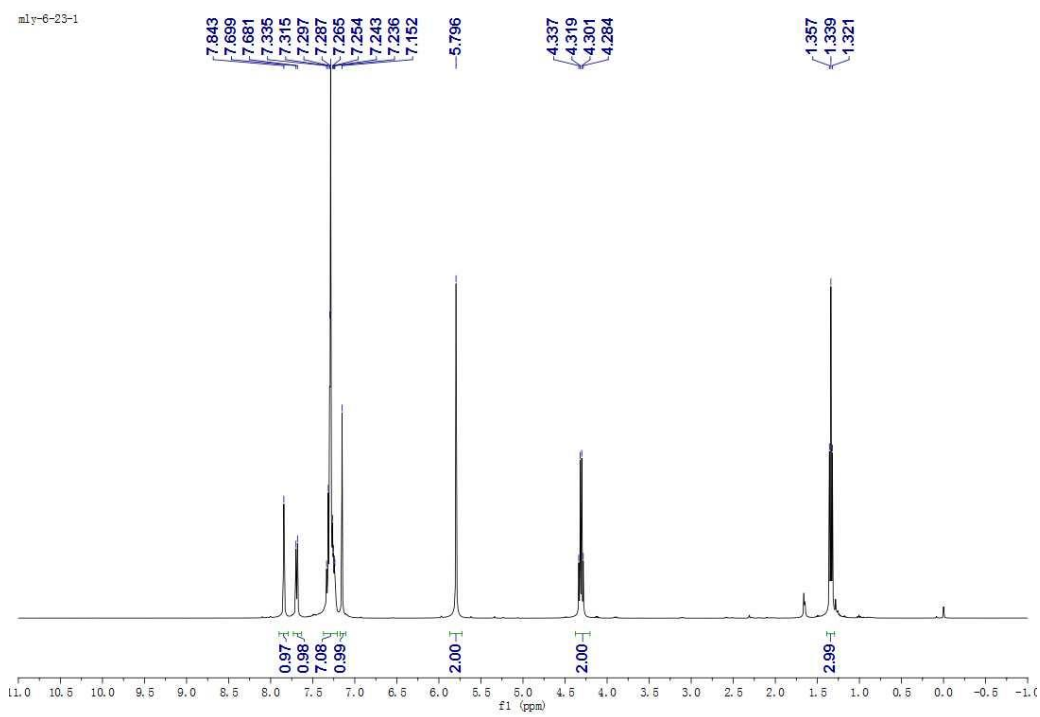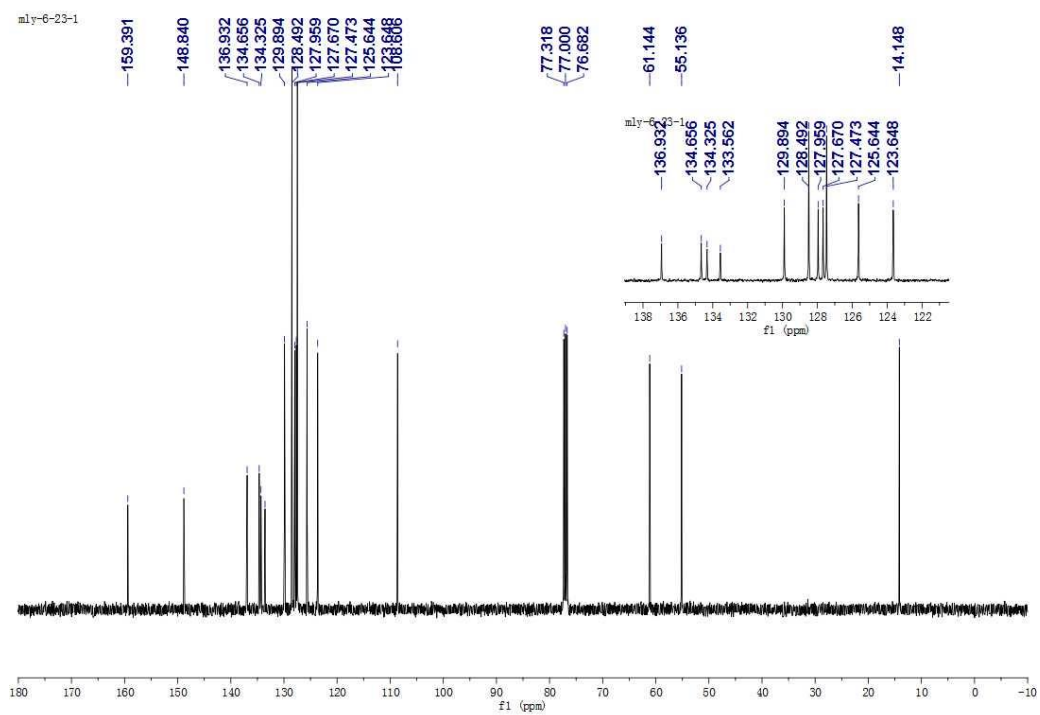

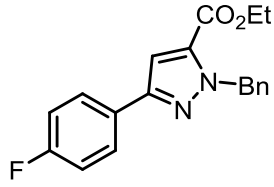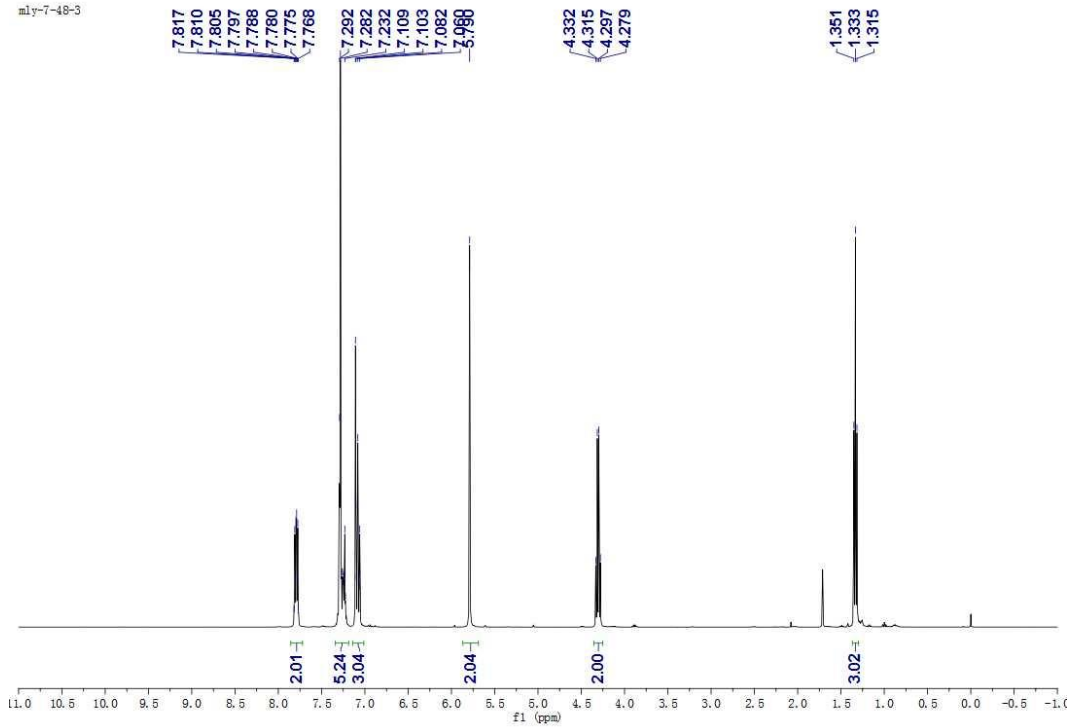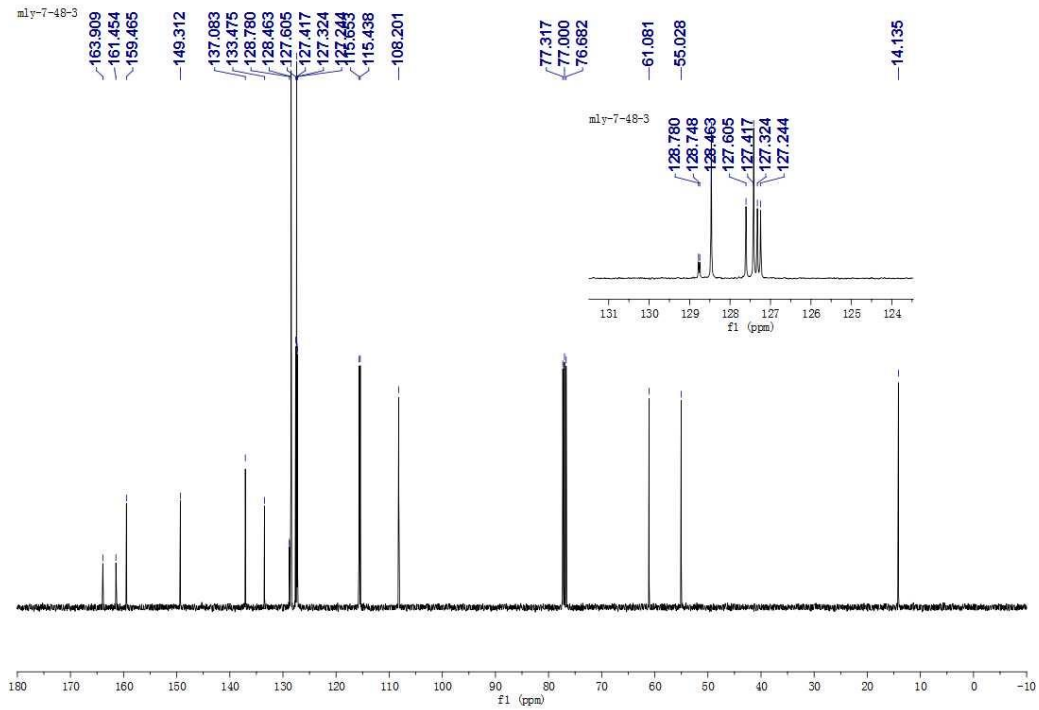

mly-7-48-3

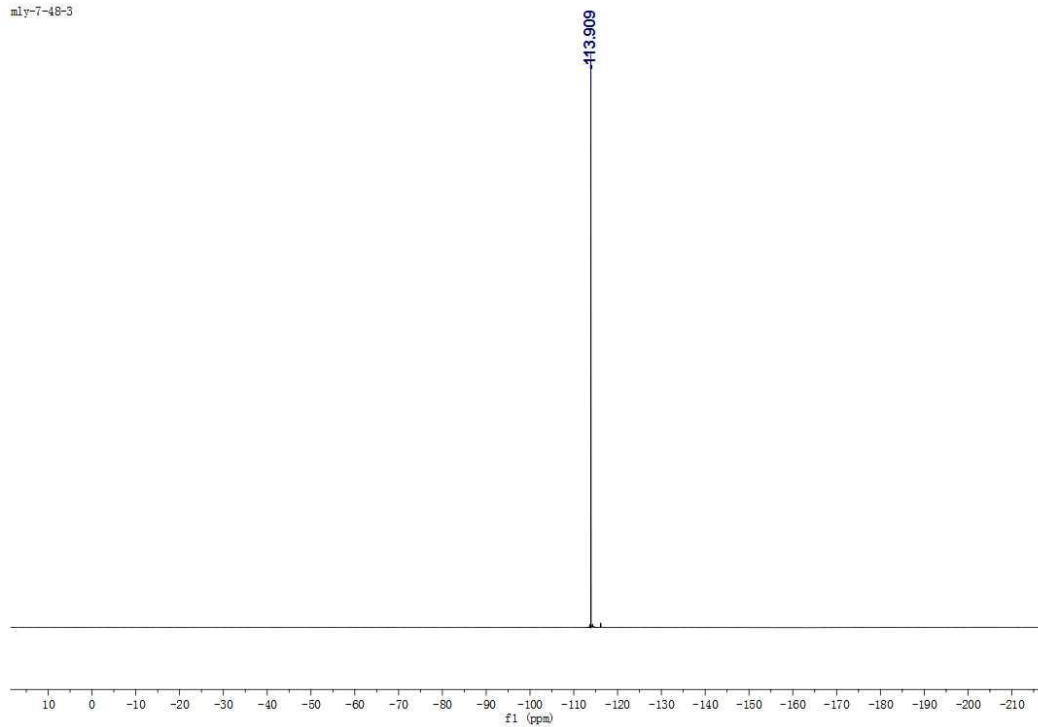

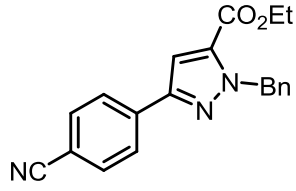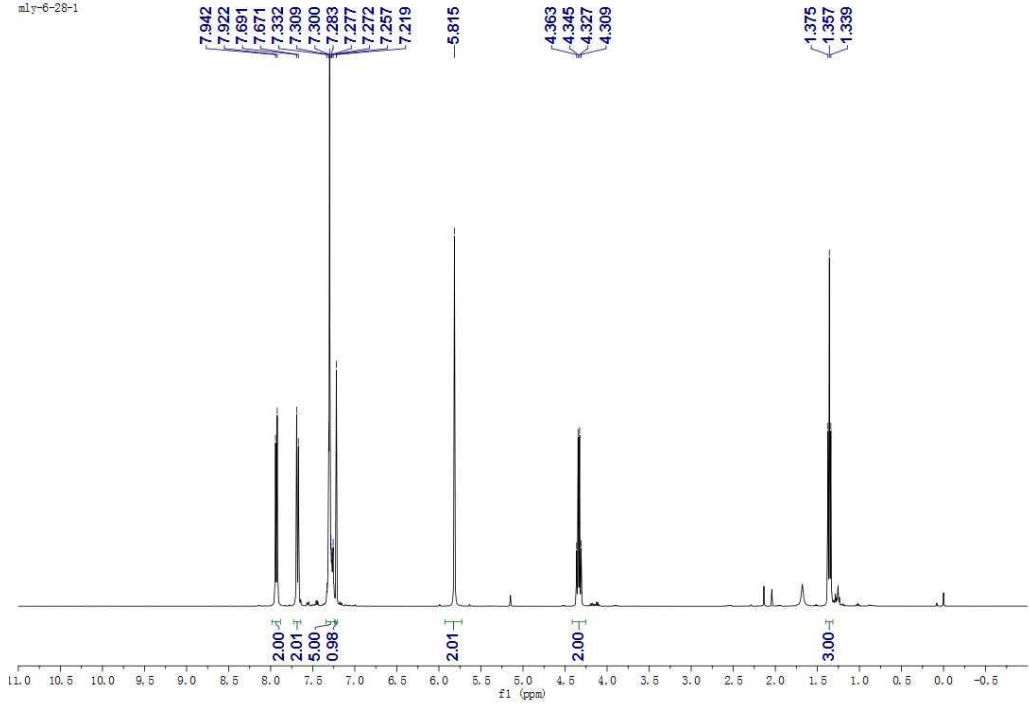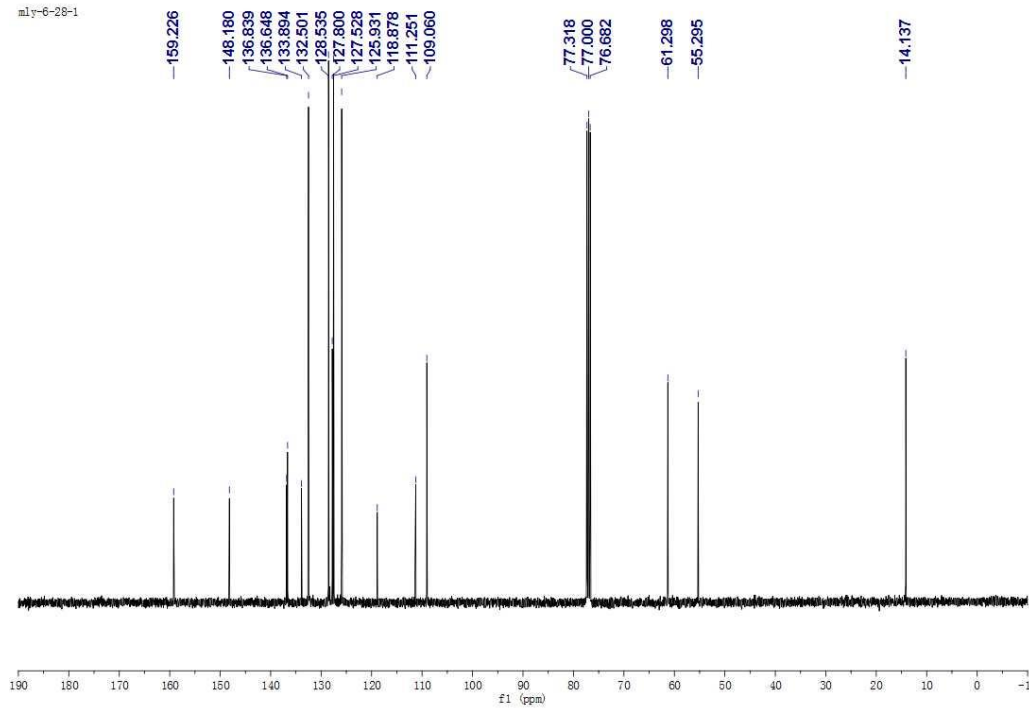

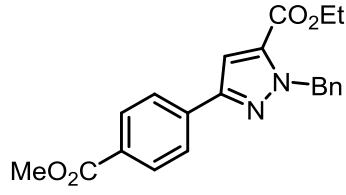

mly-6-27-1

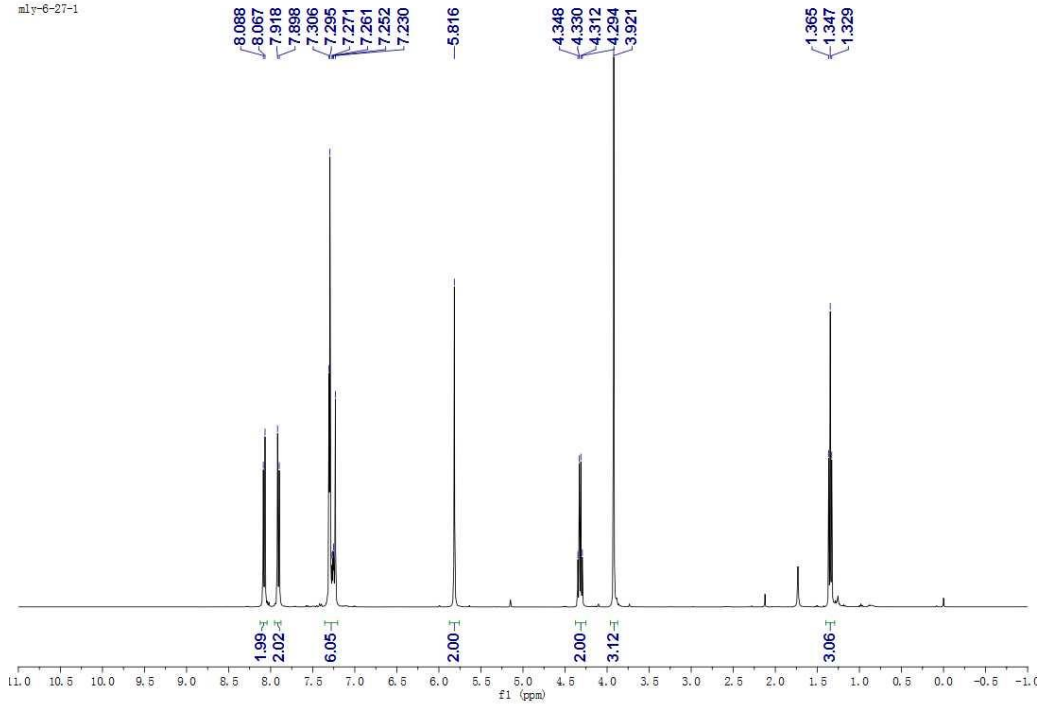

mly-6-27-1

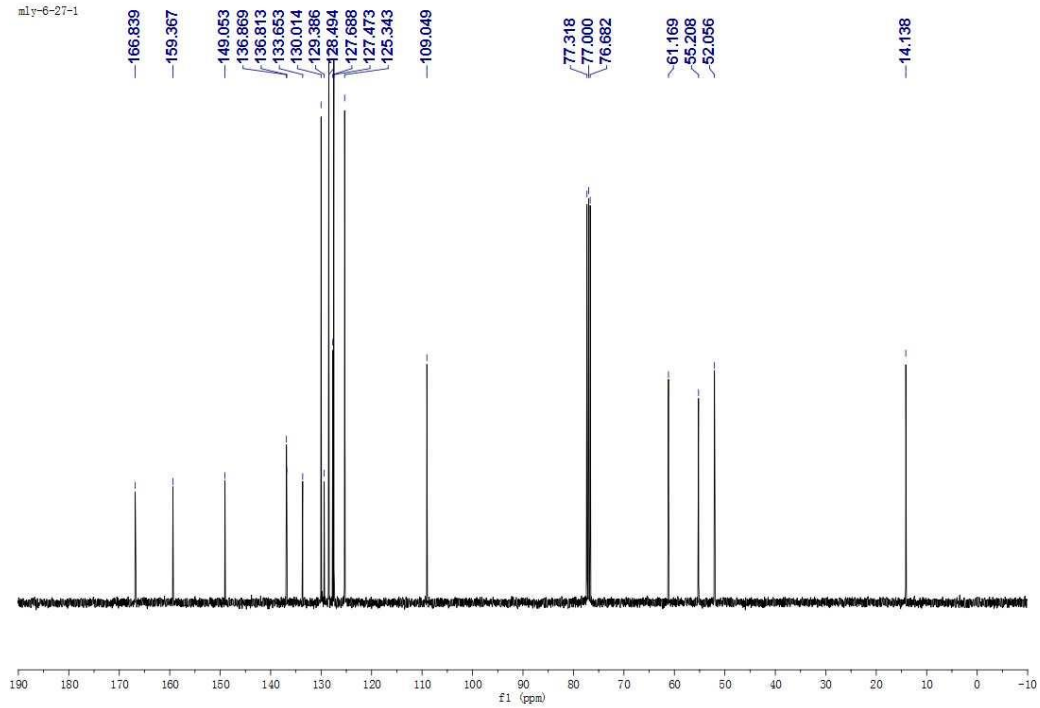

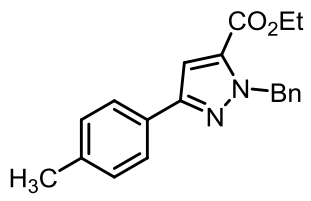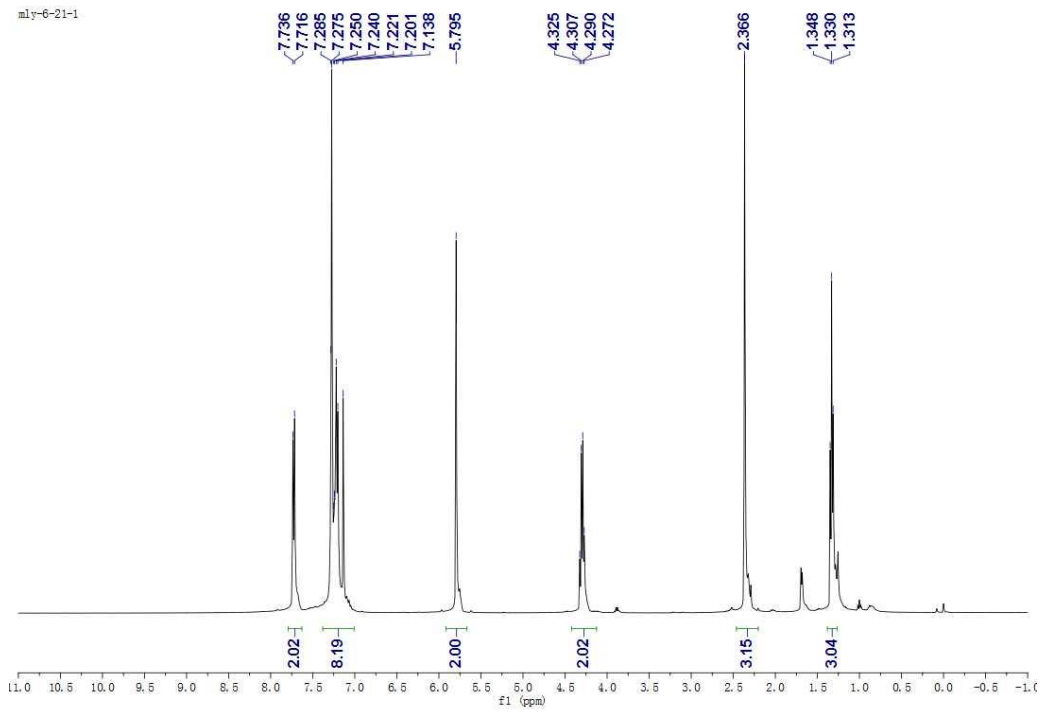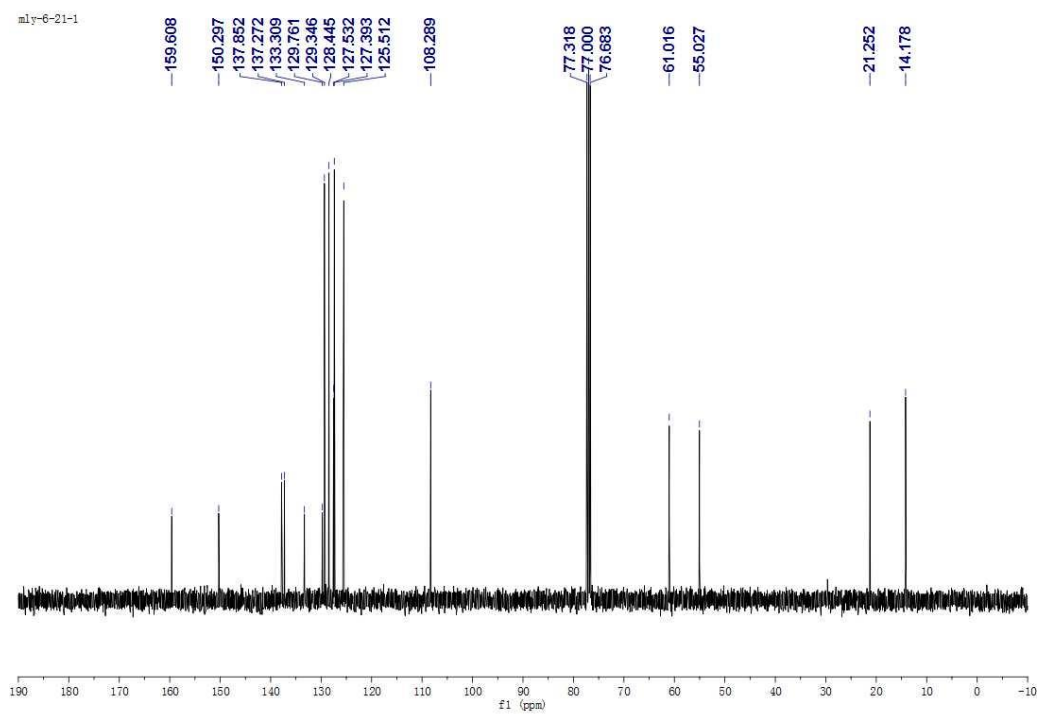

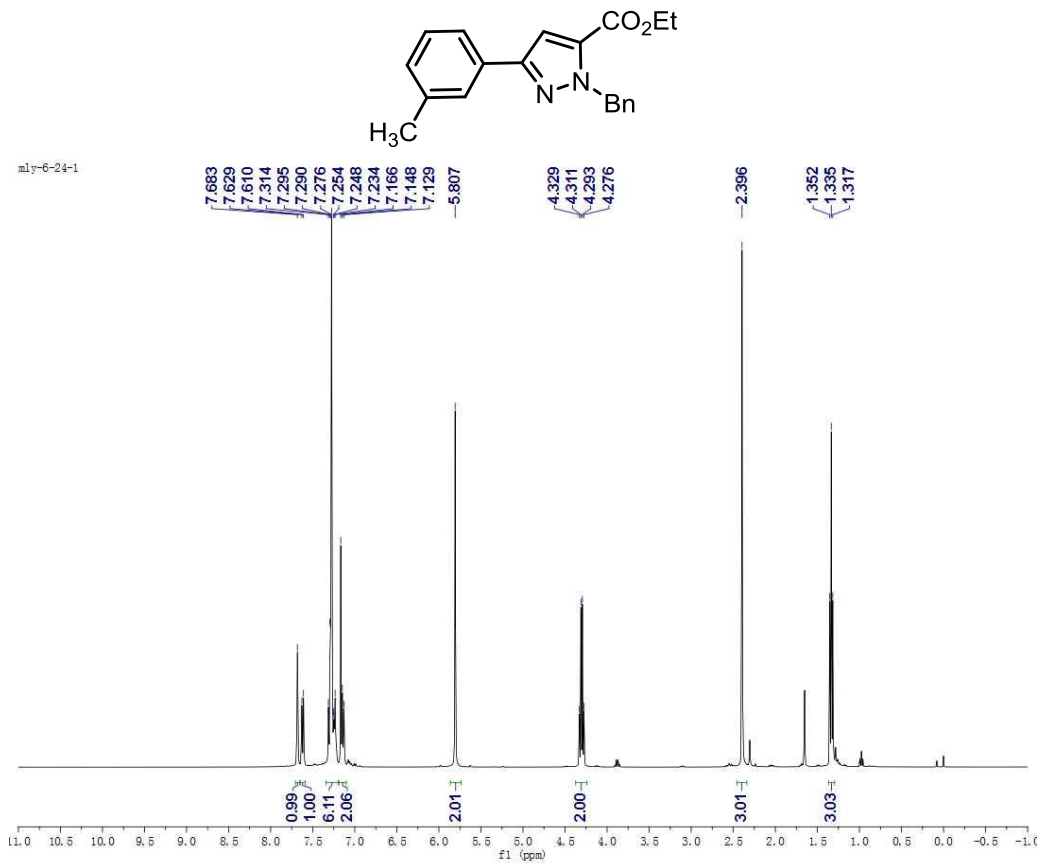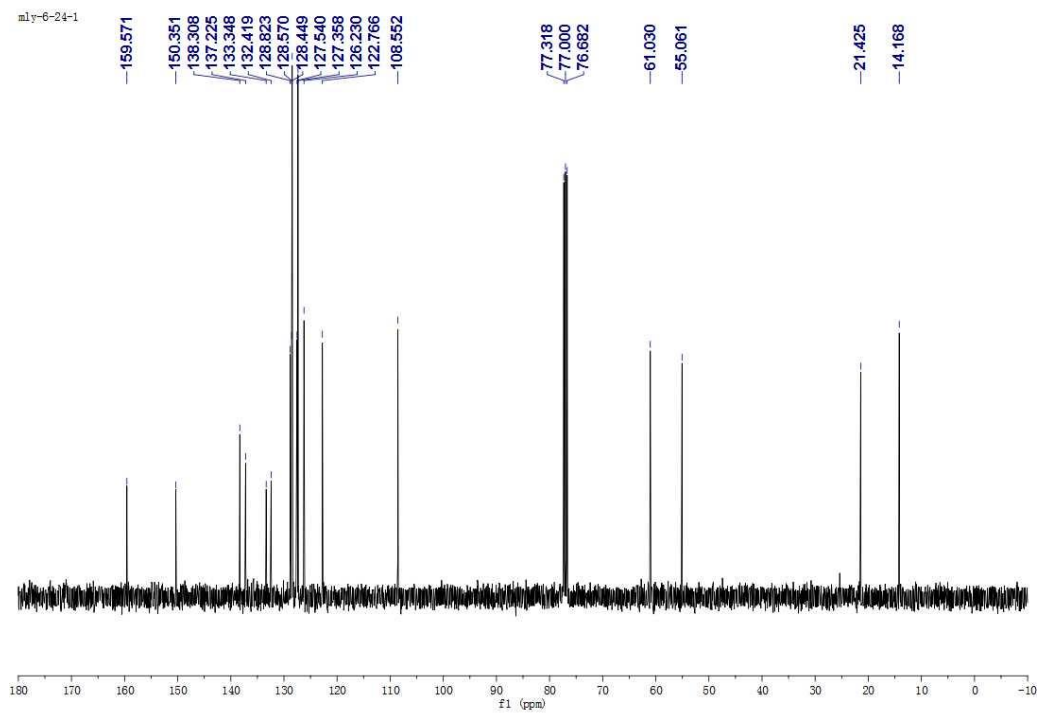

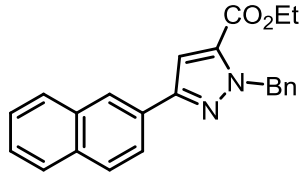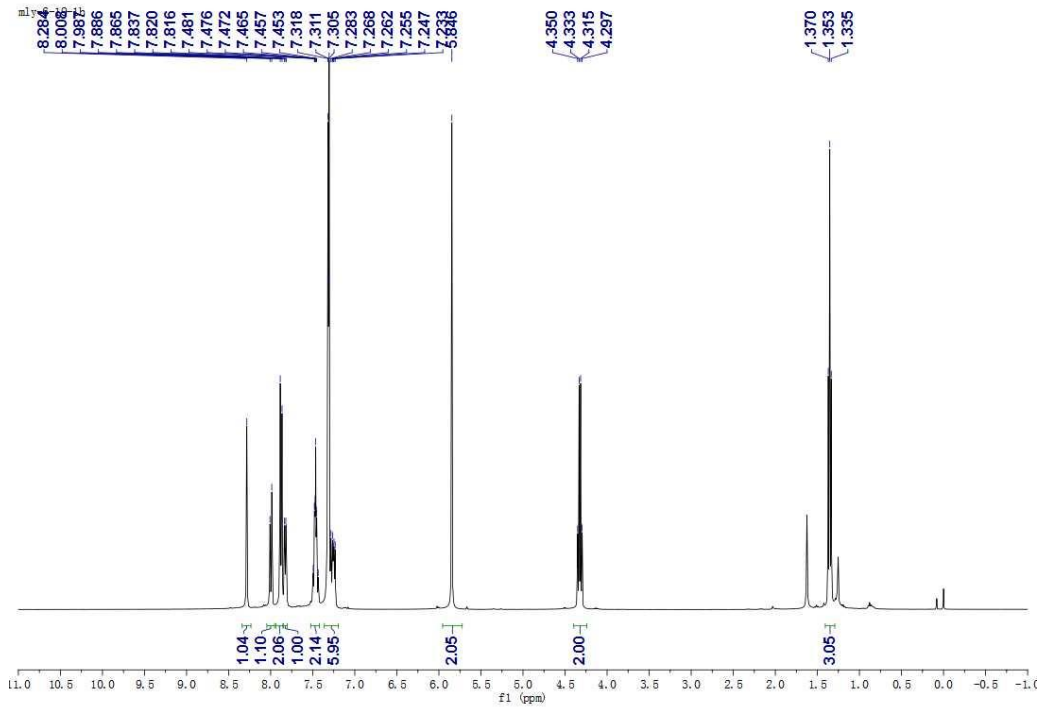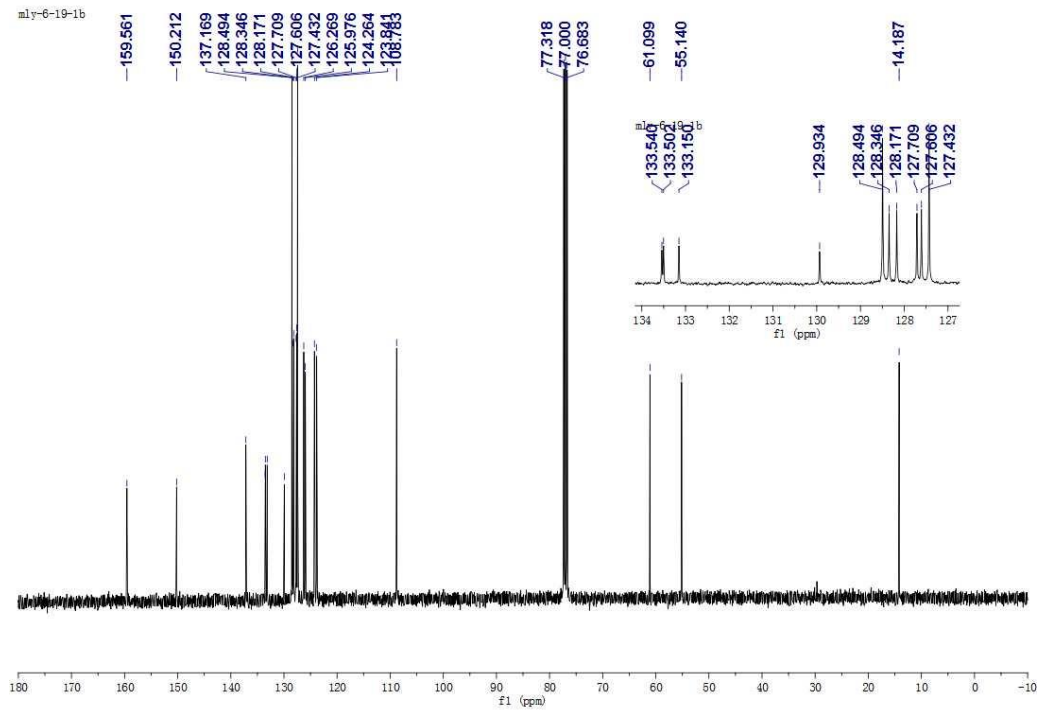



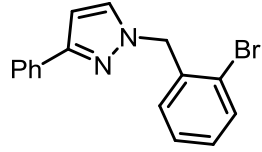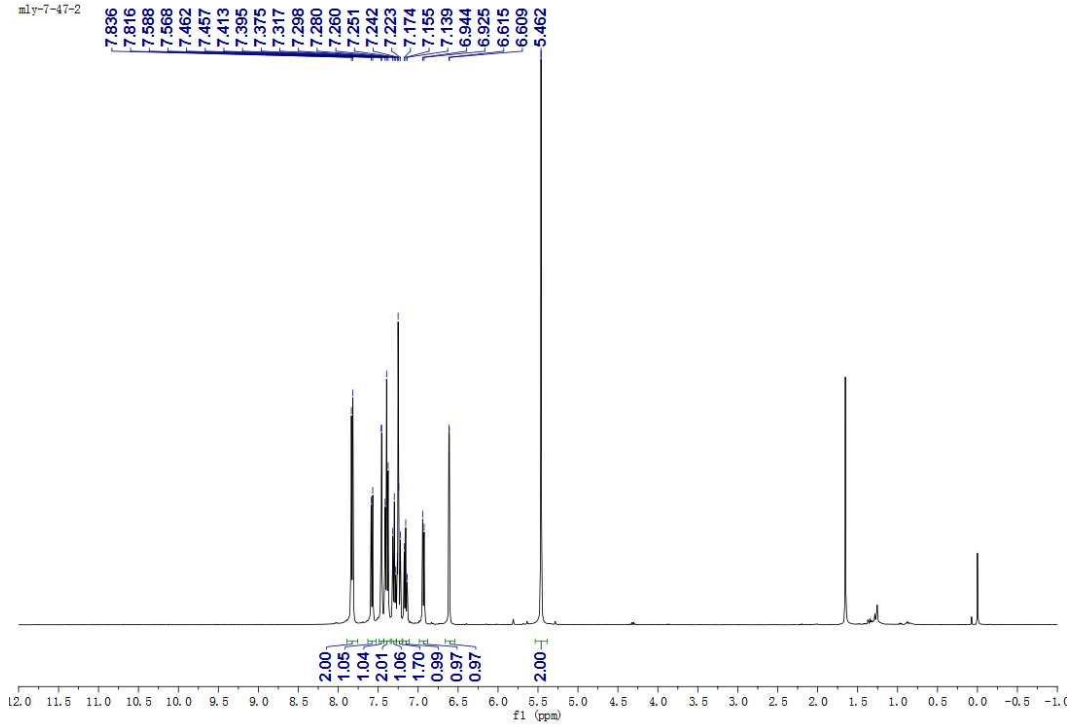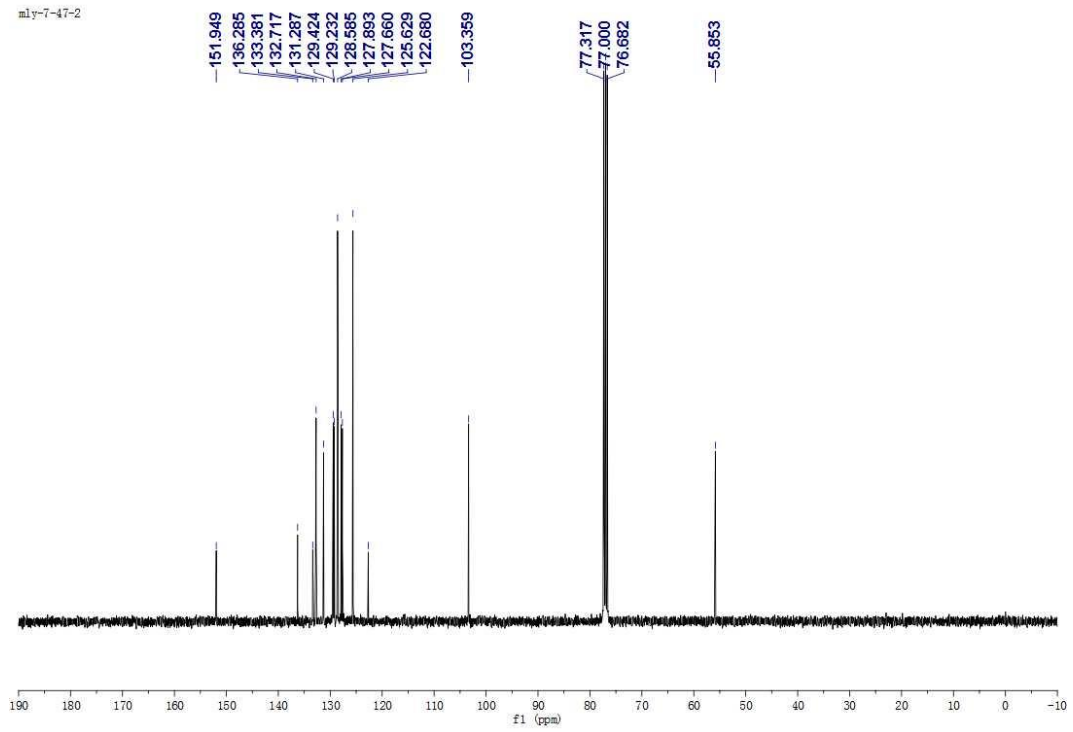

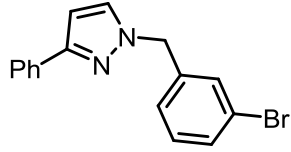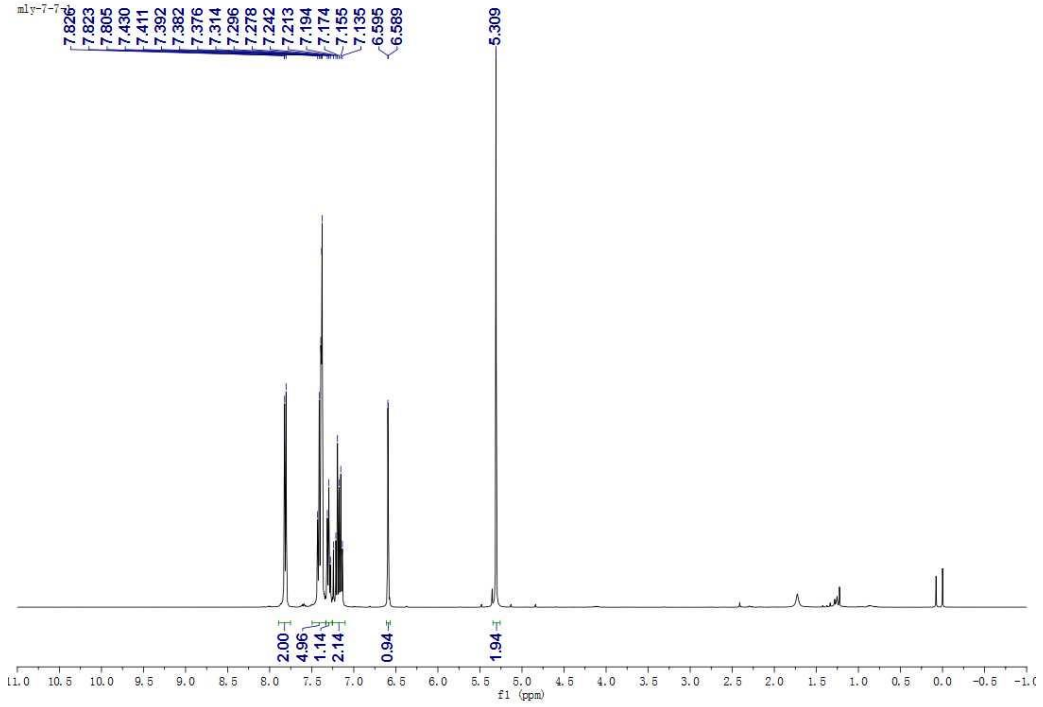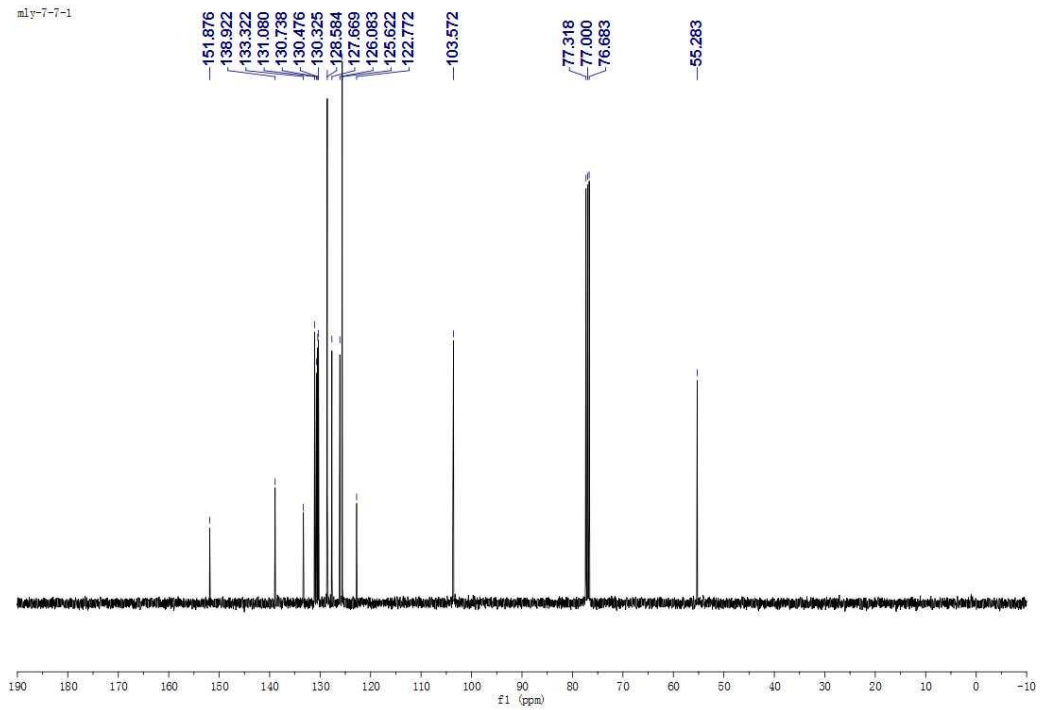

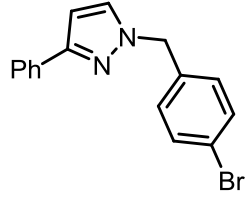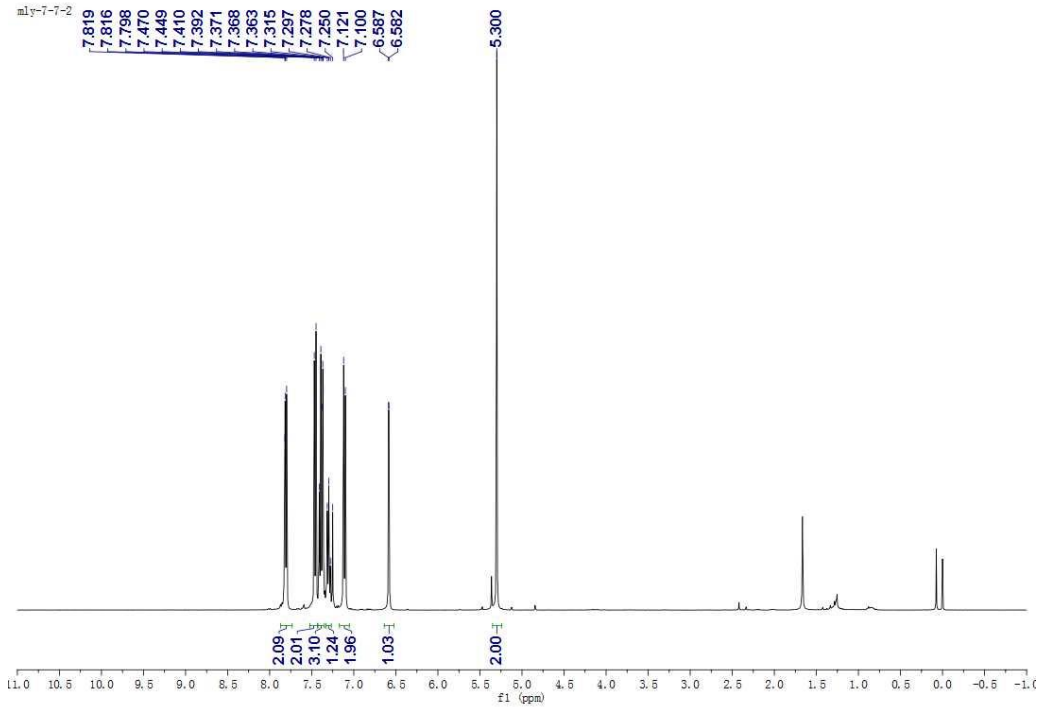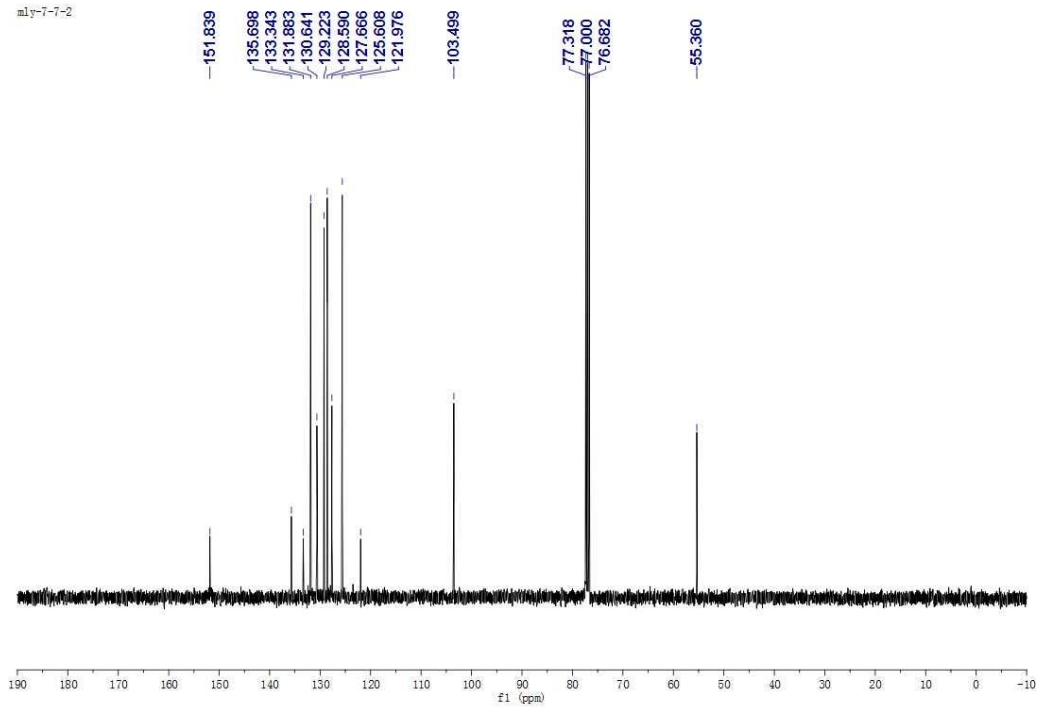

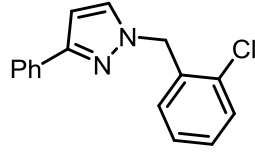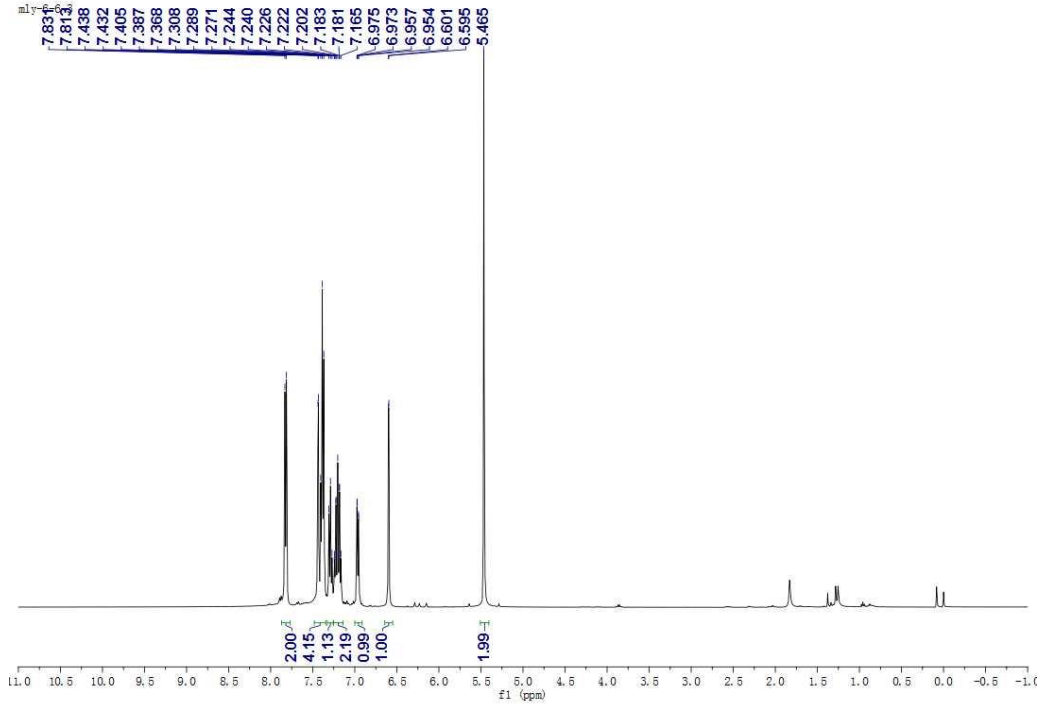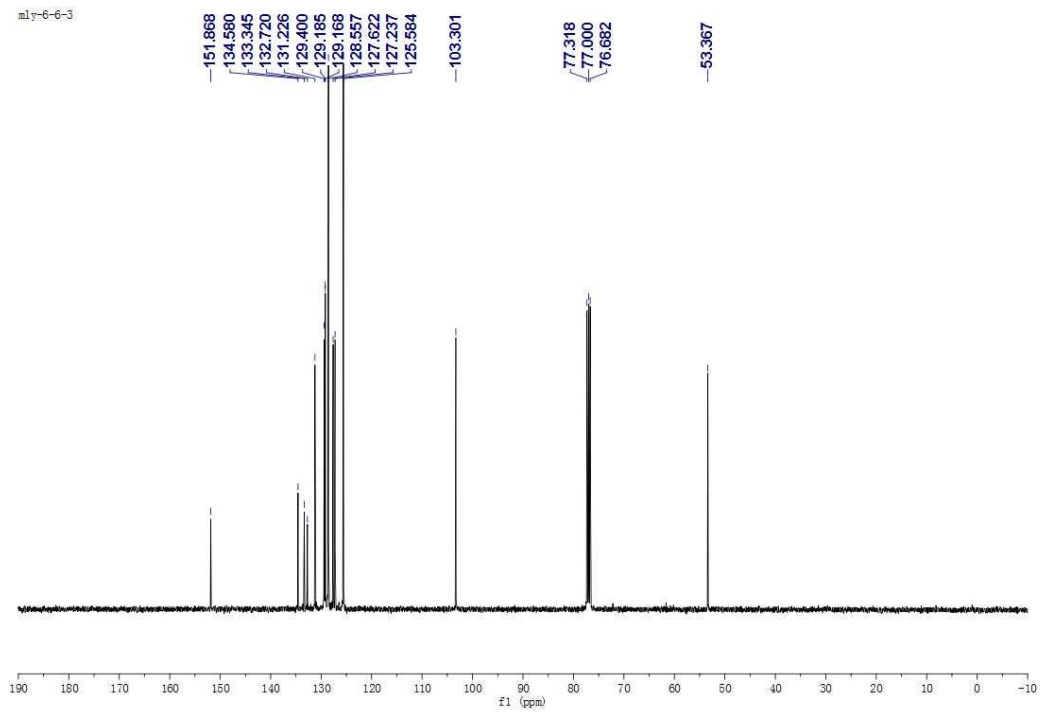

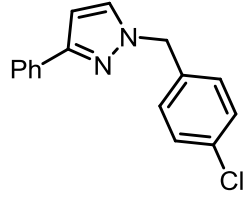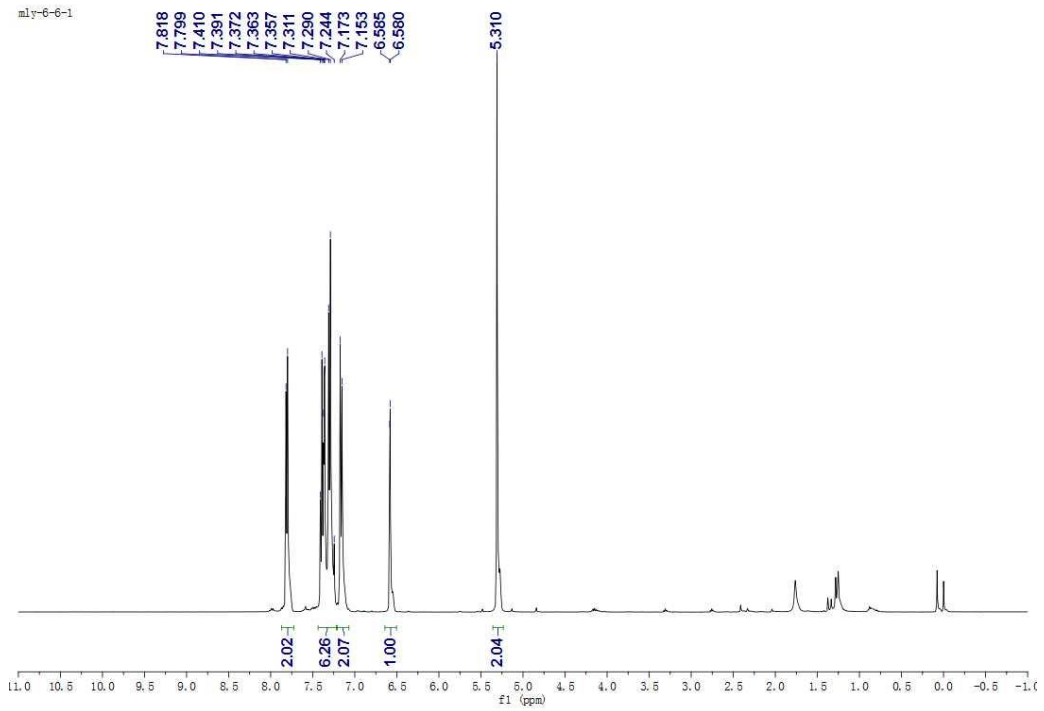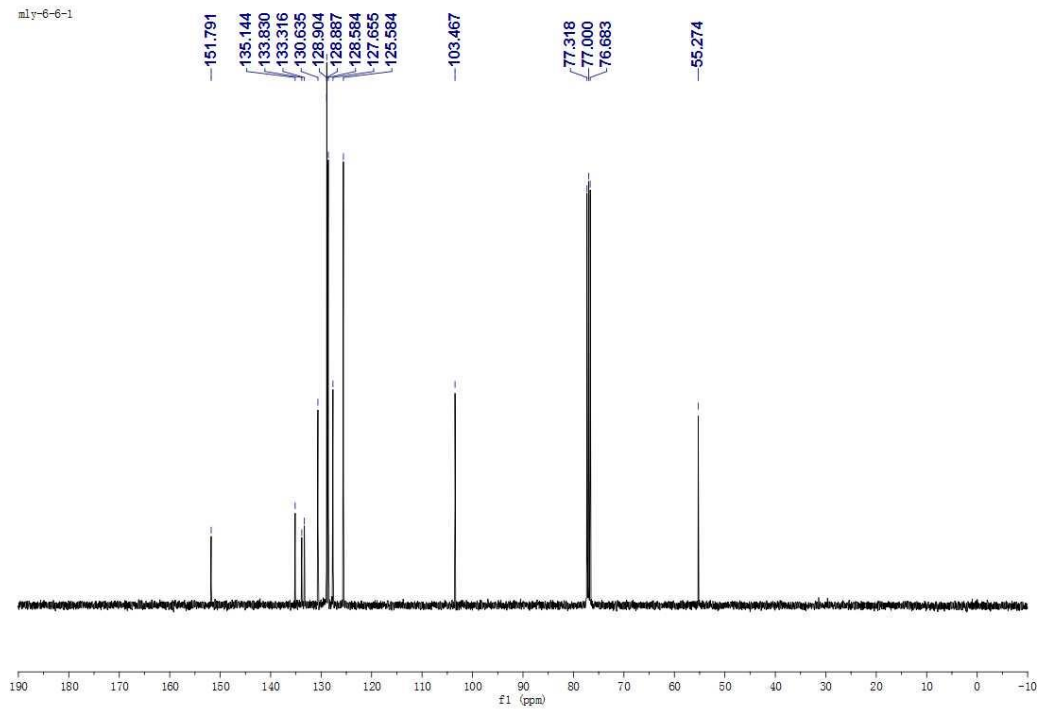

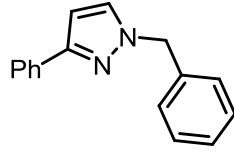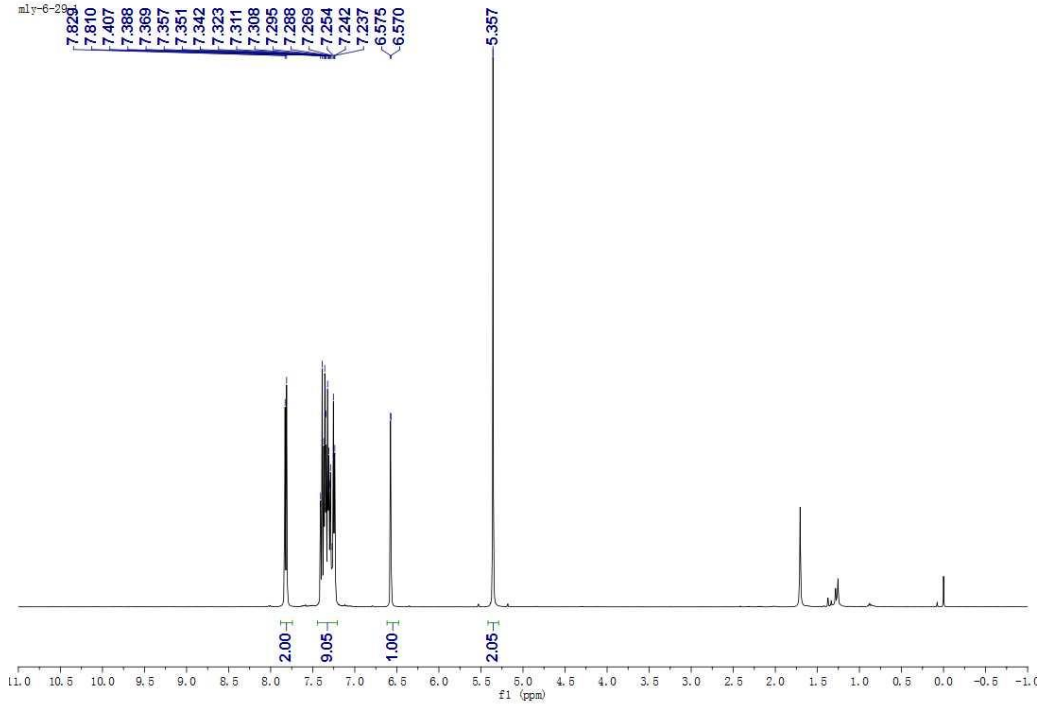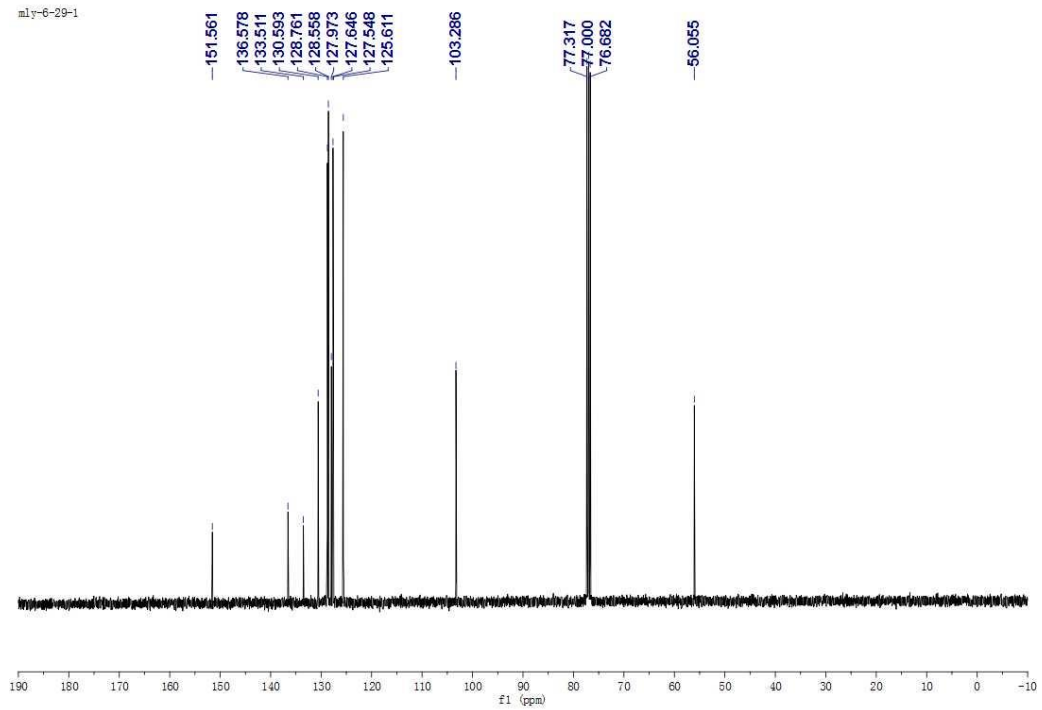

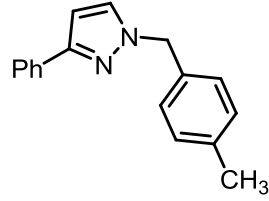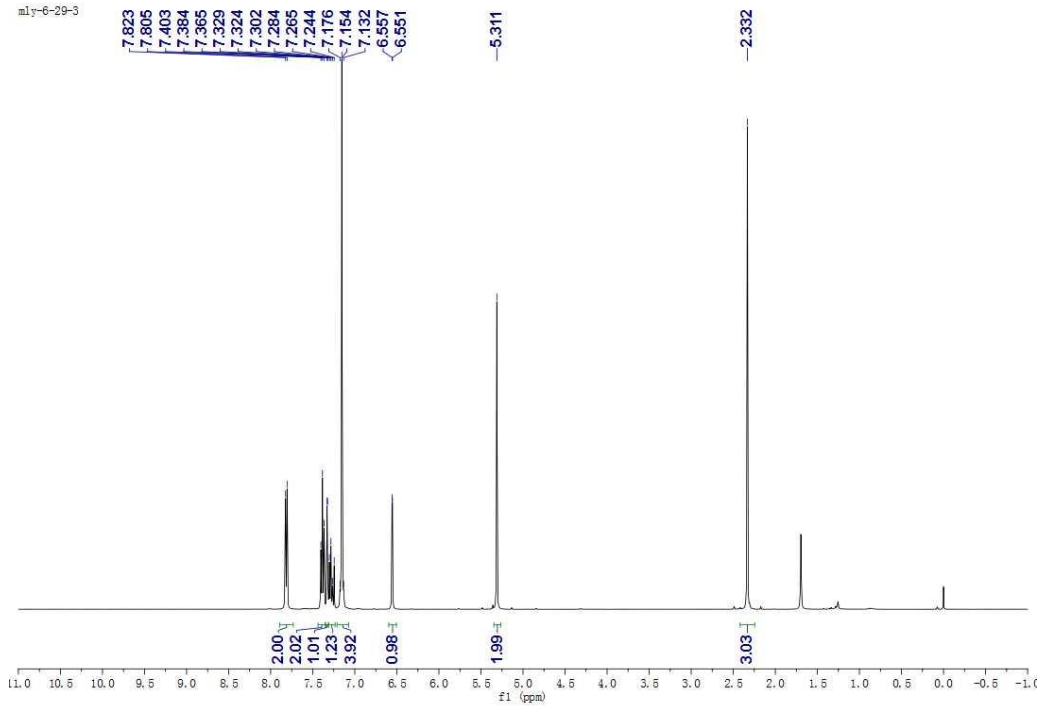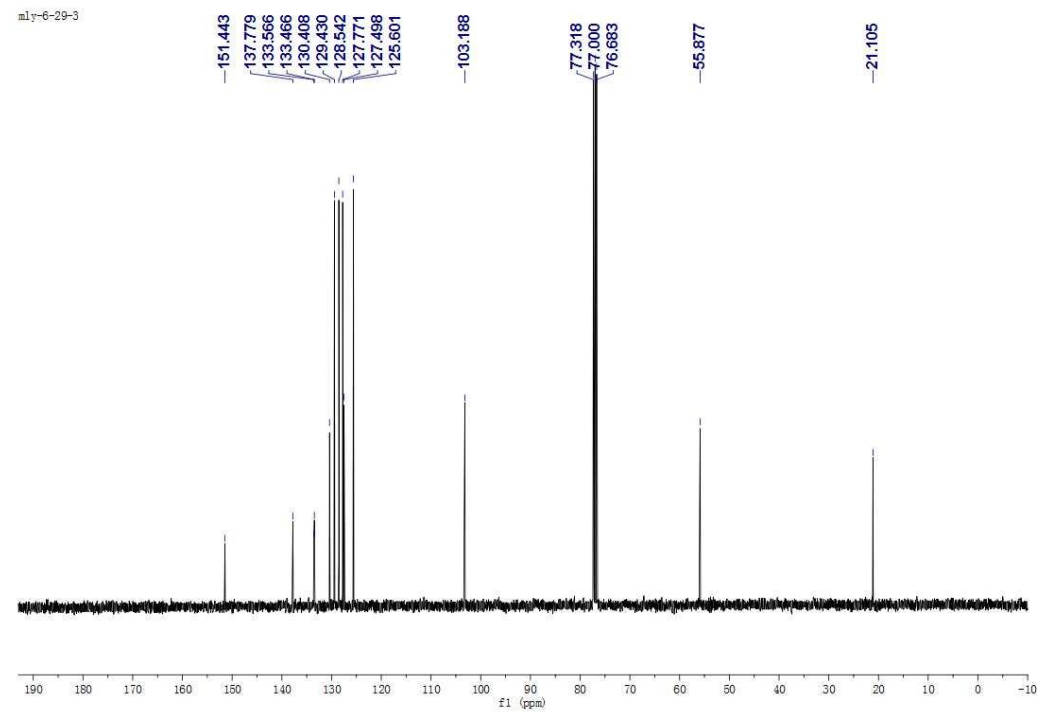

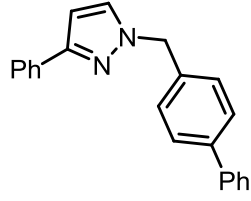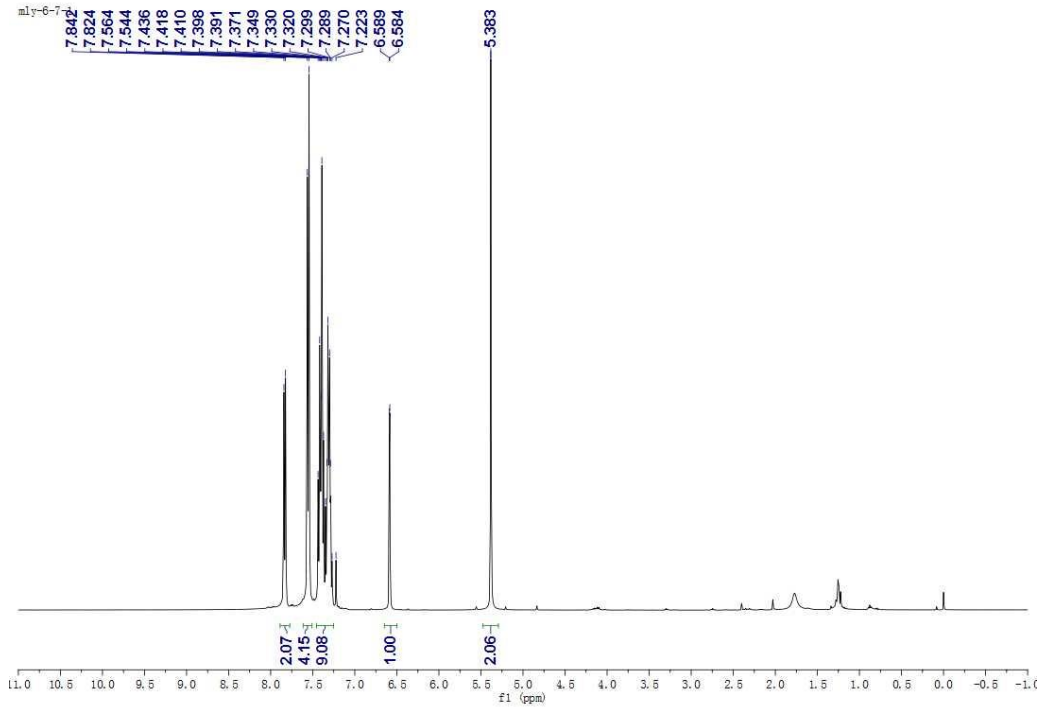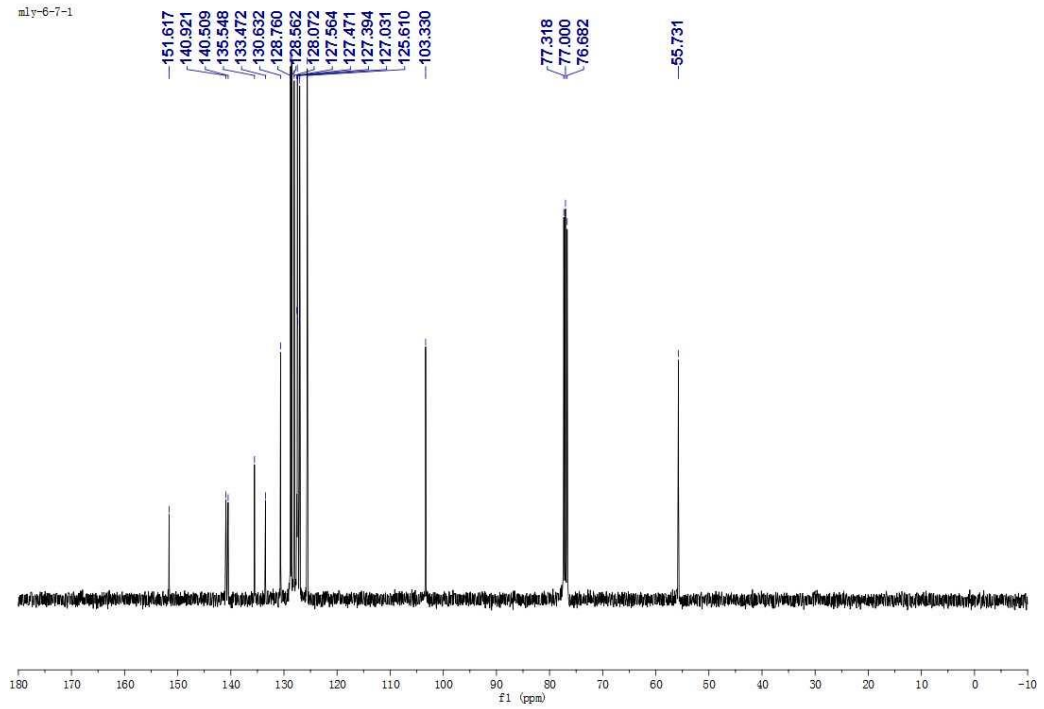



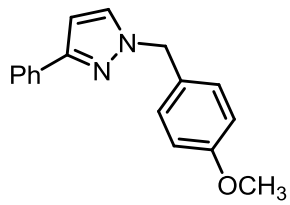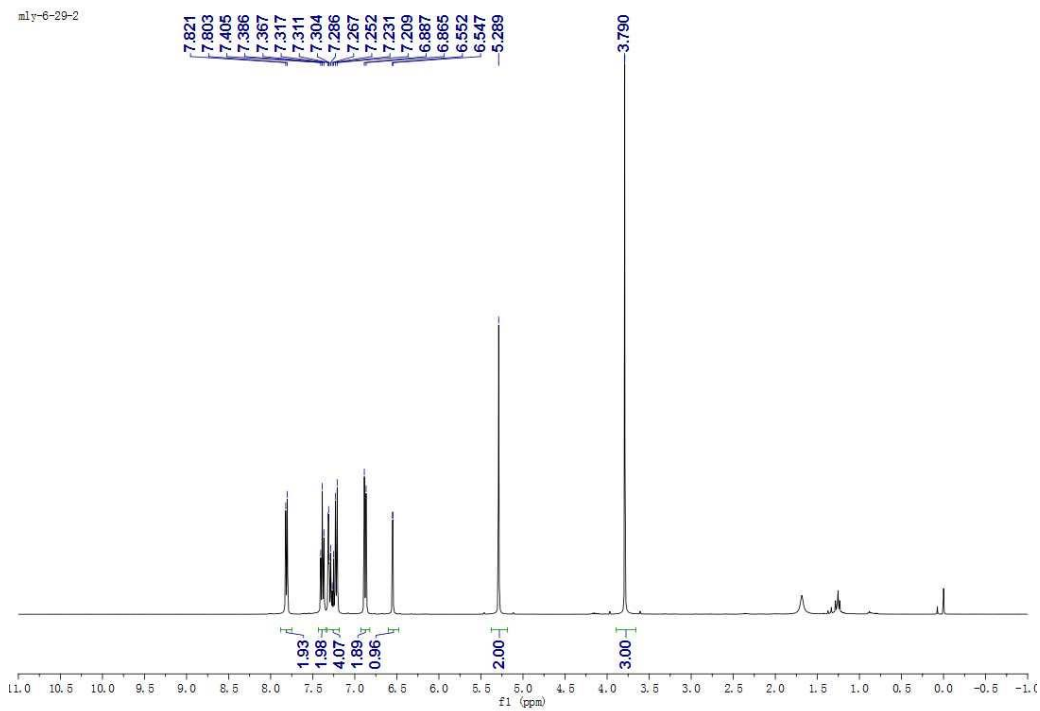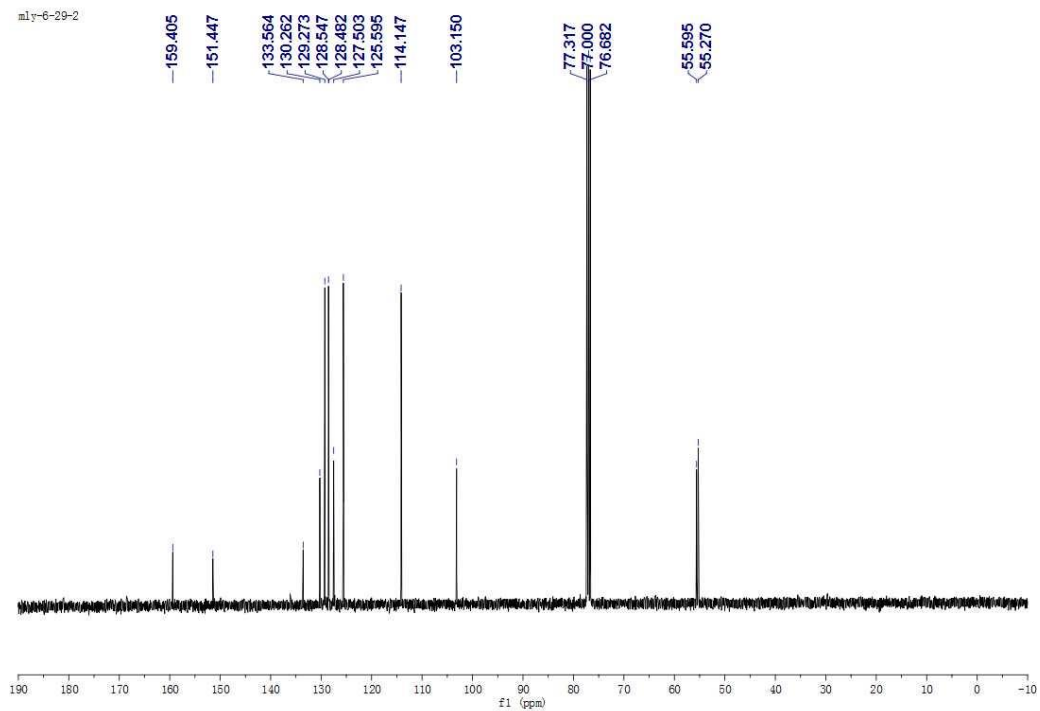

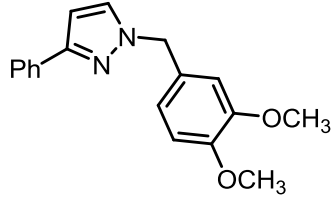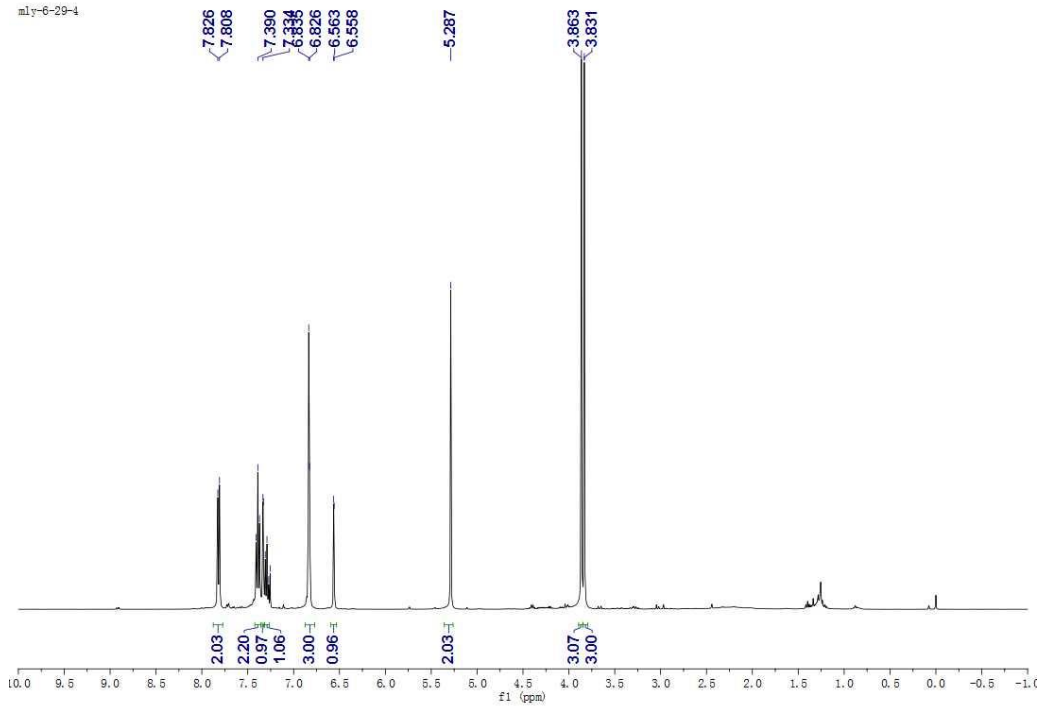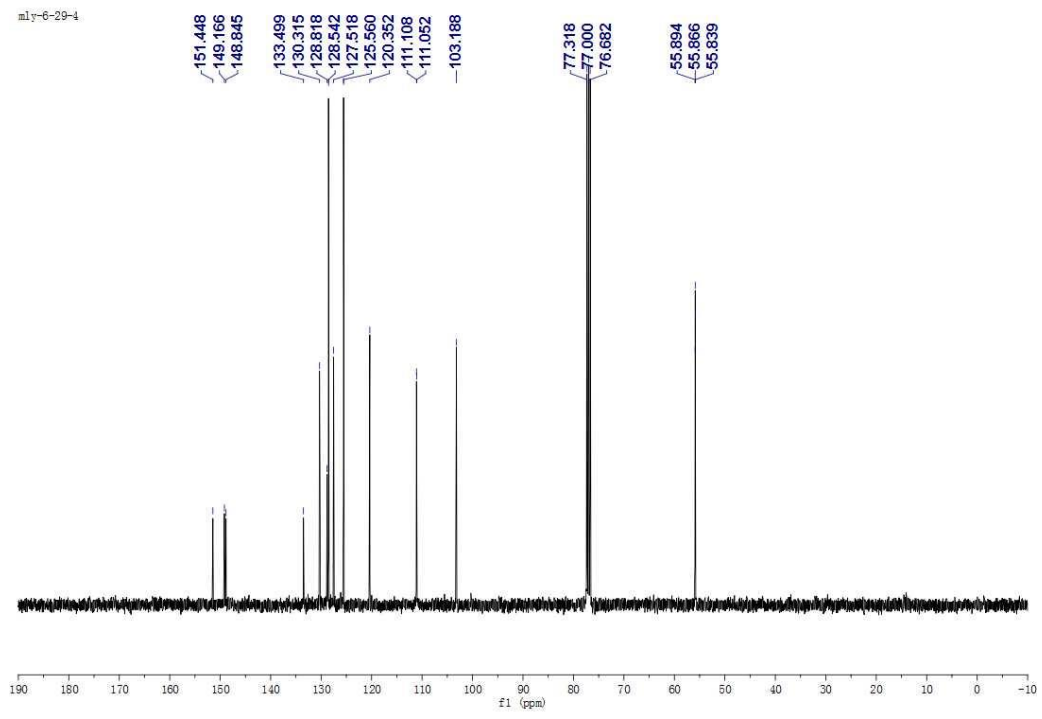

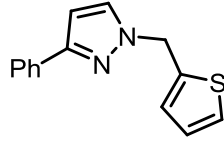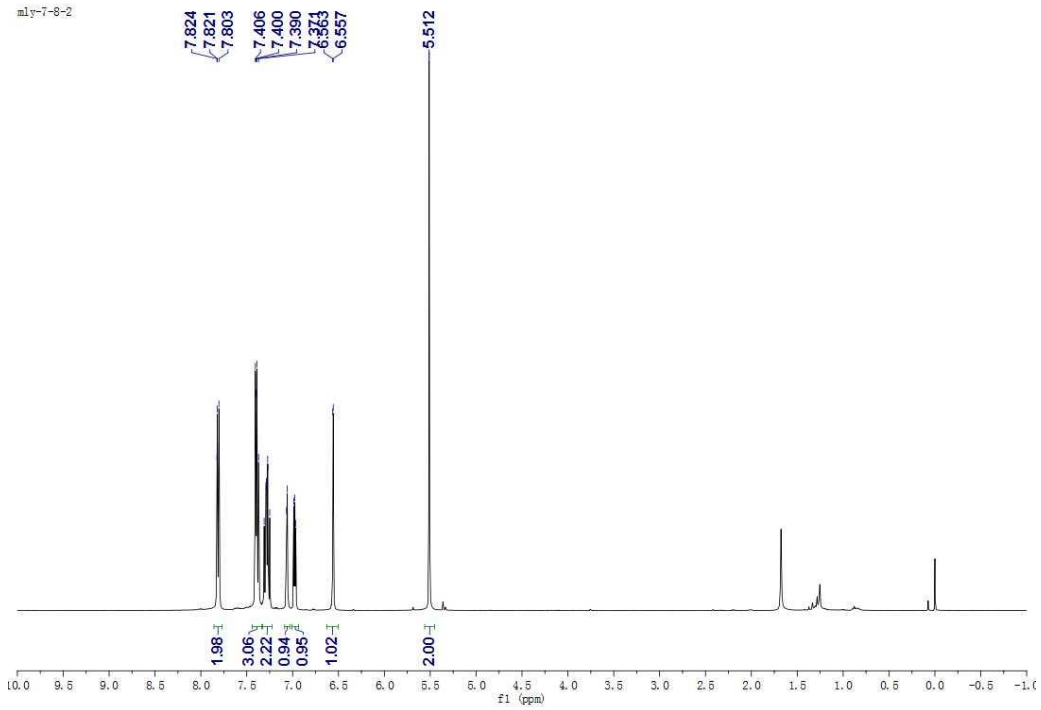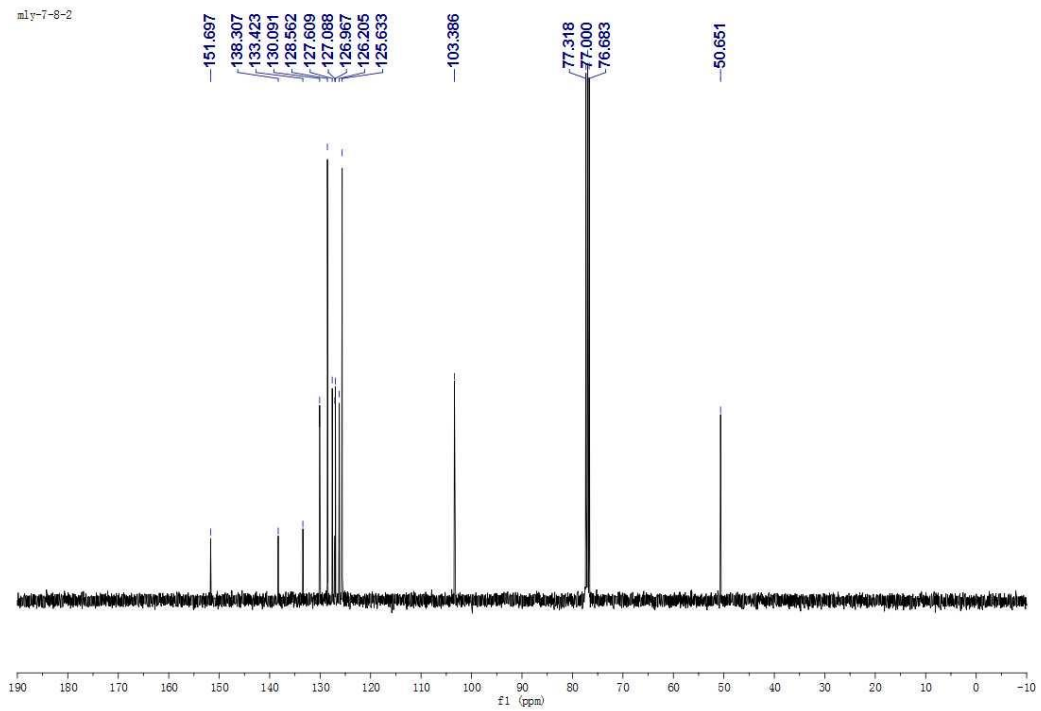

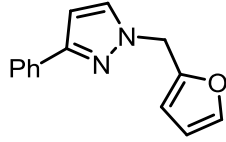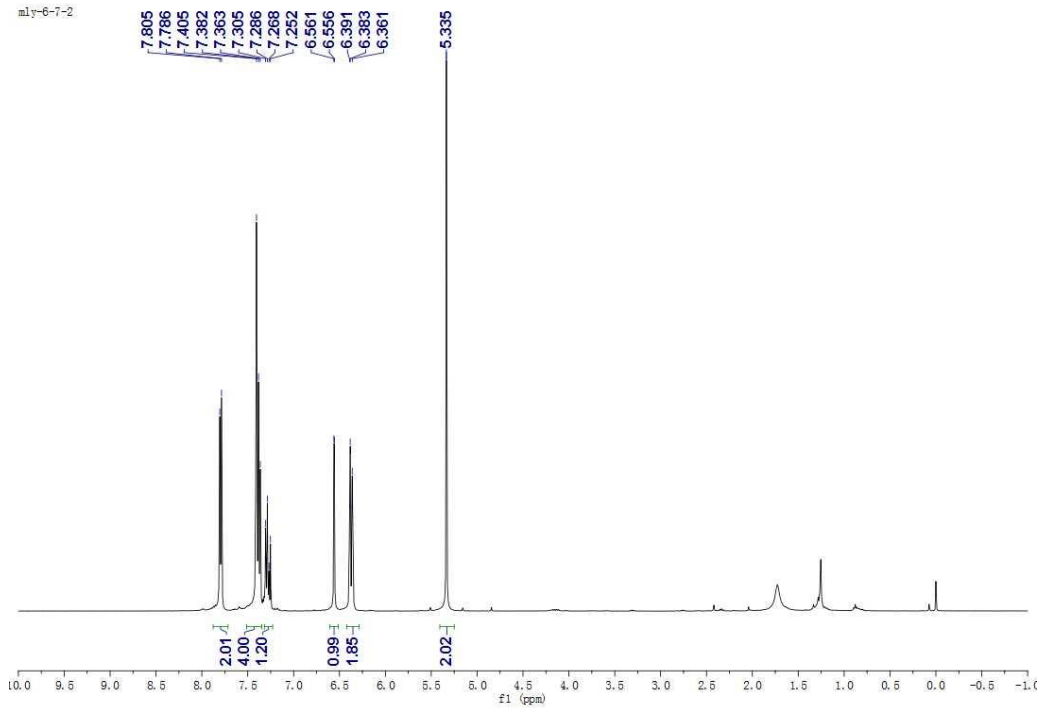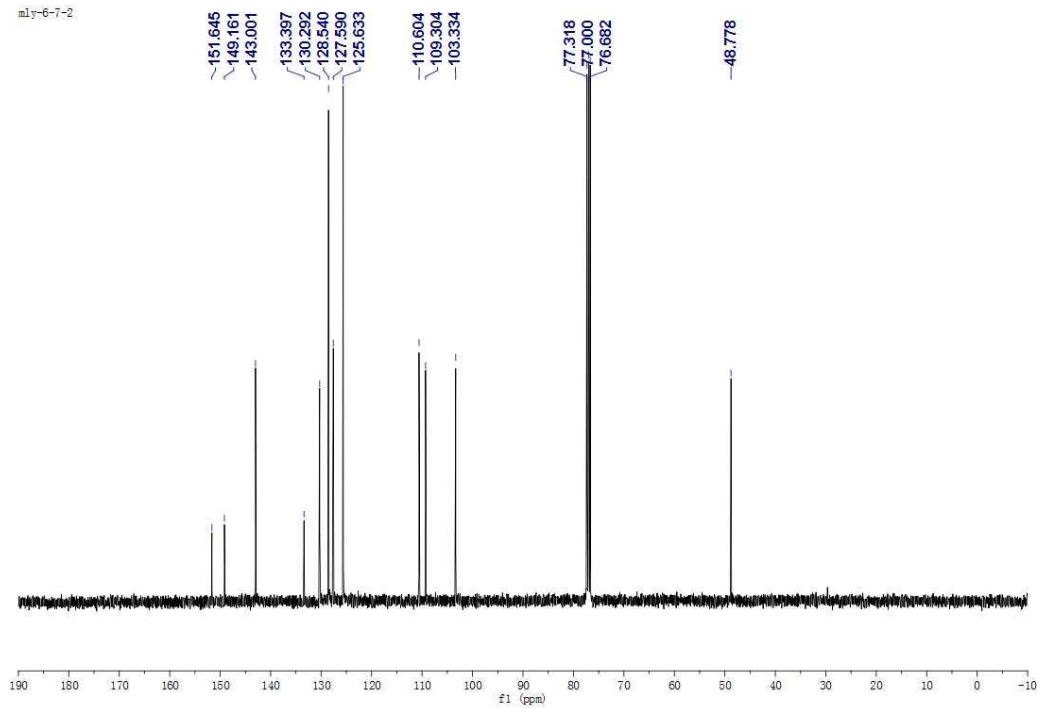

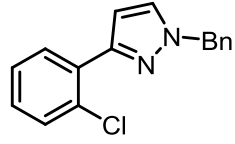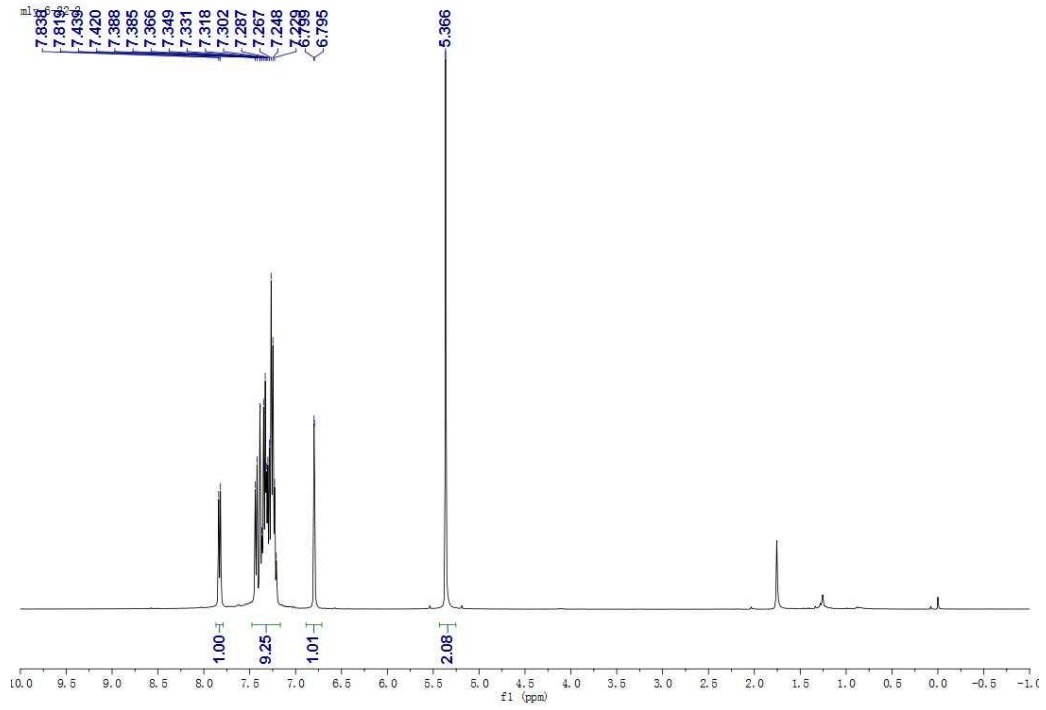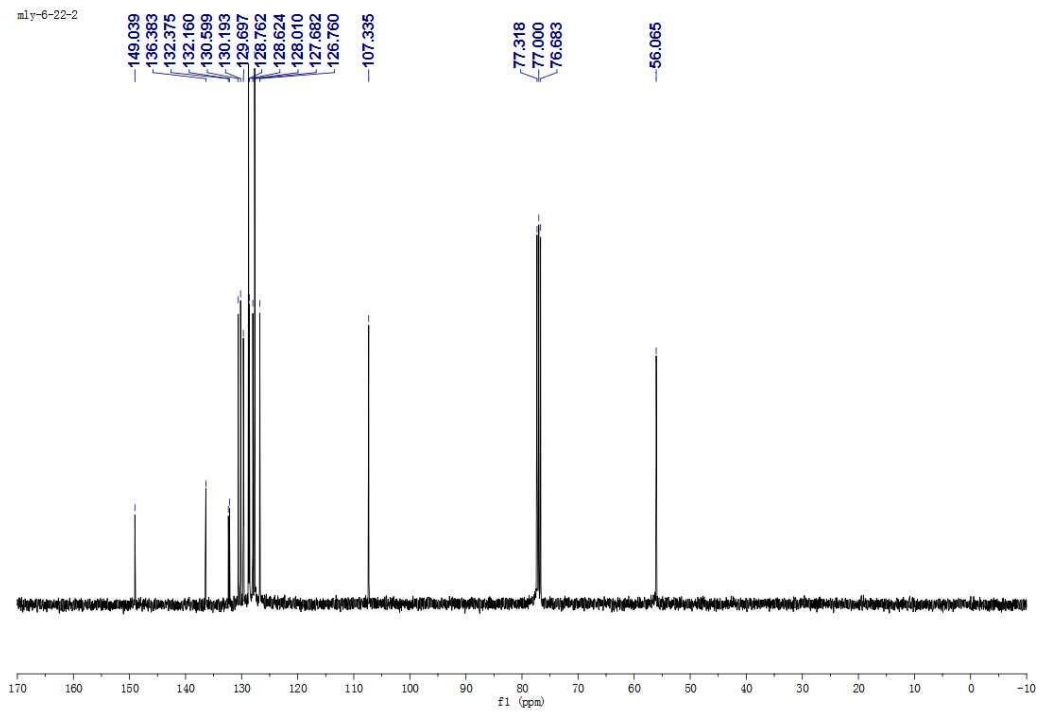

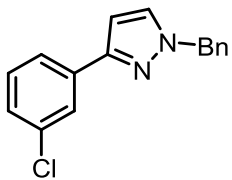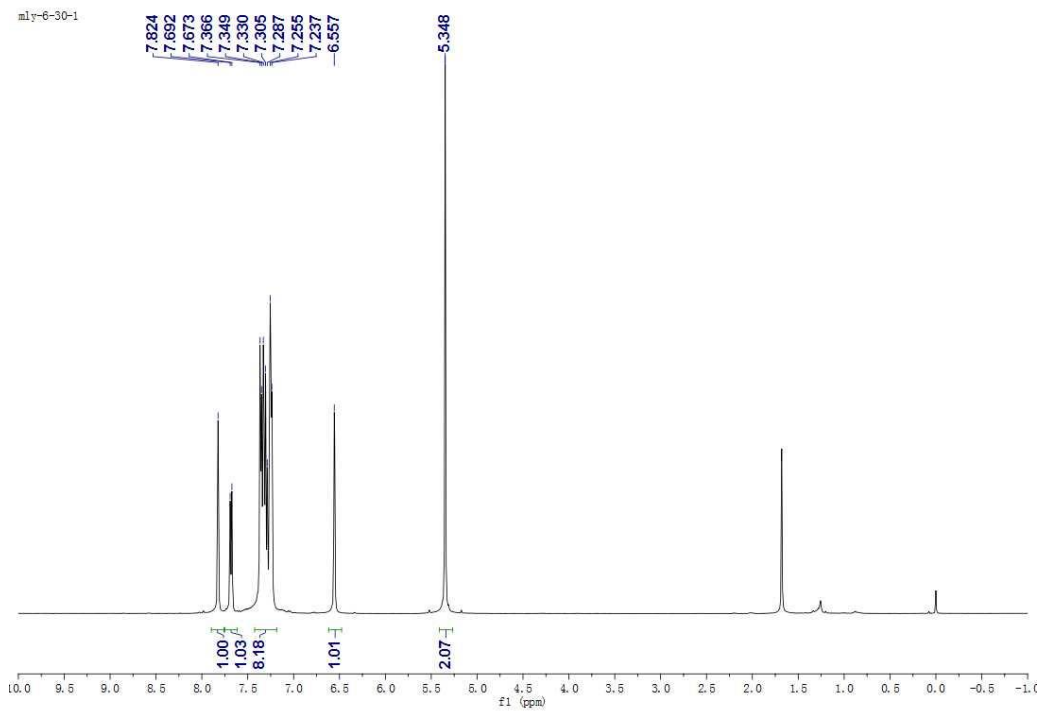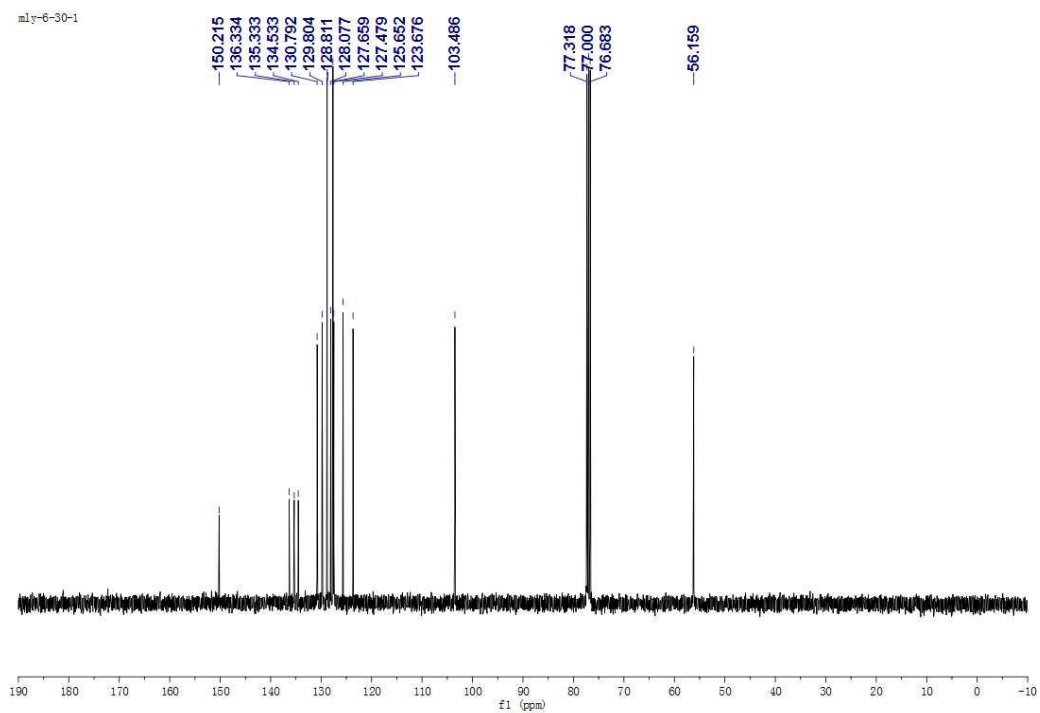

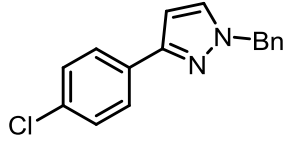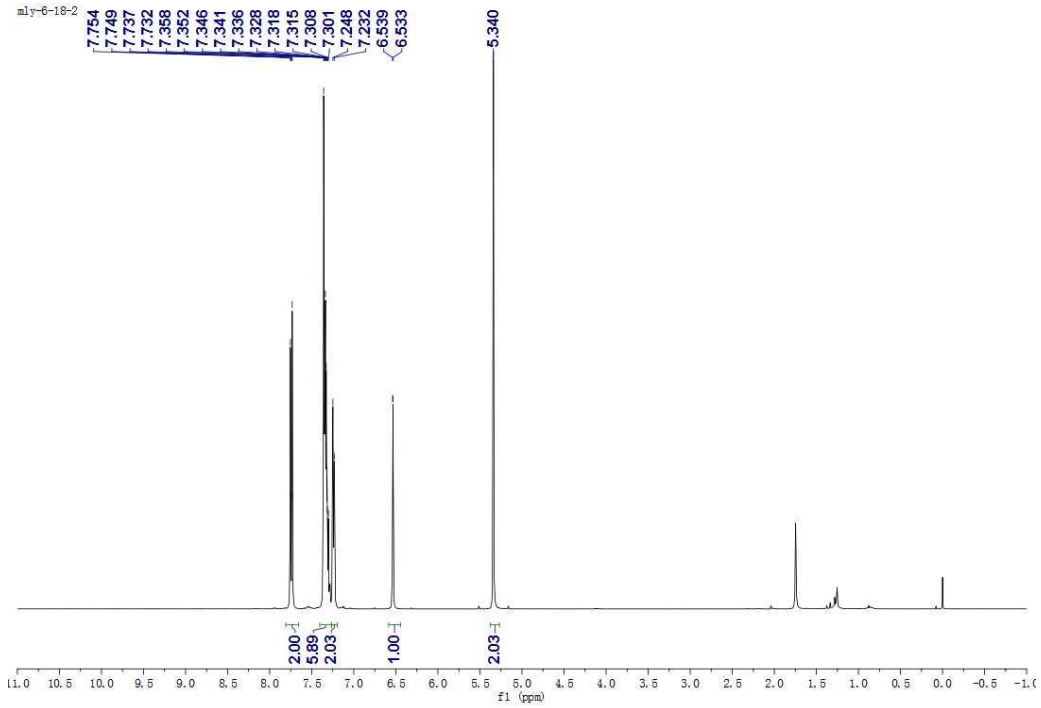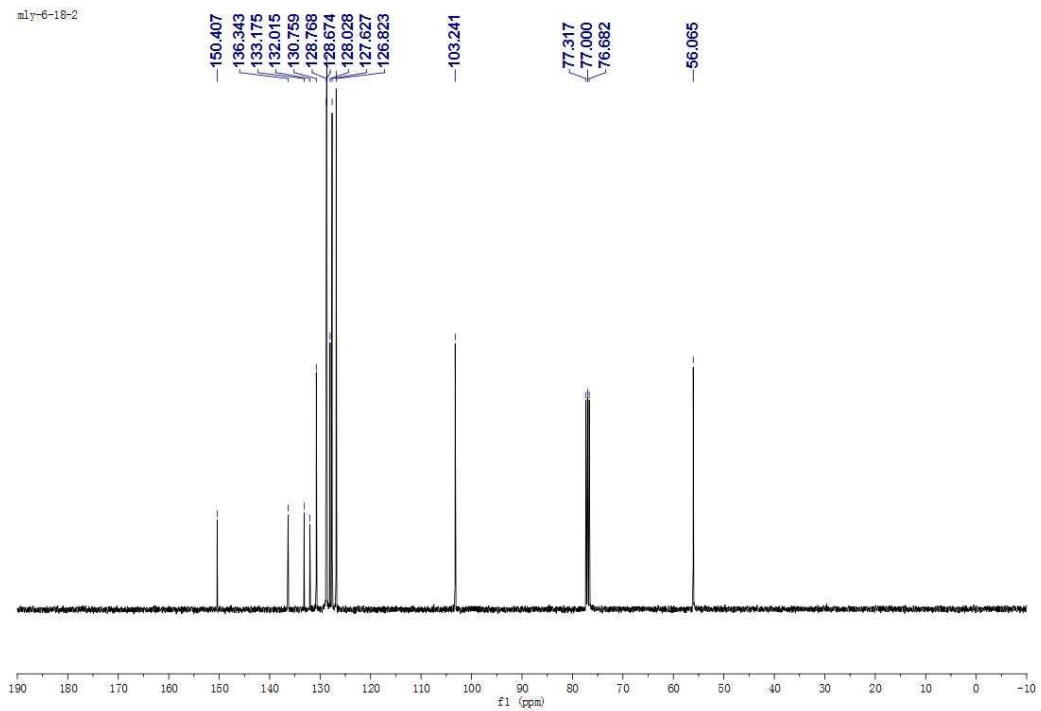

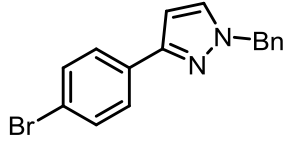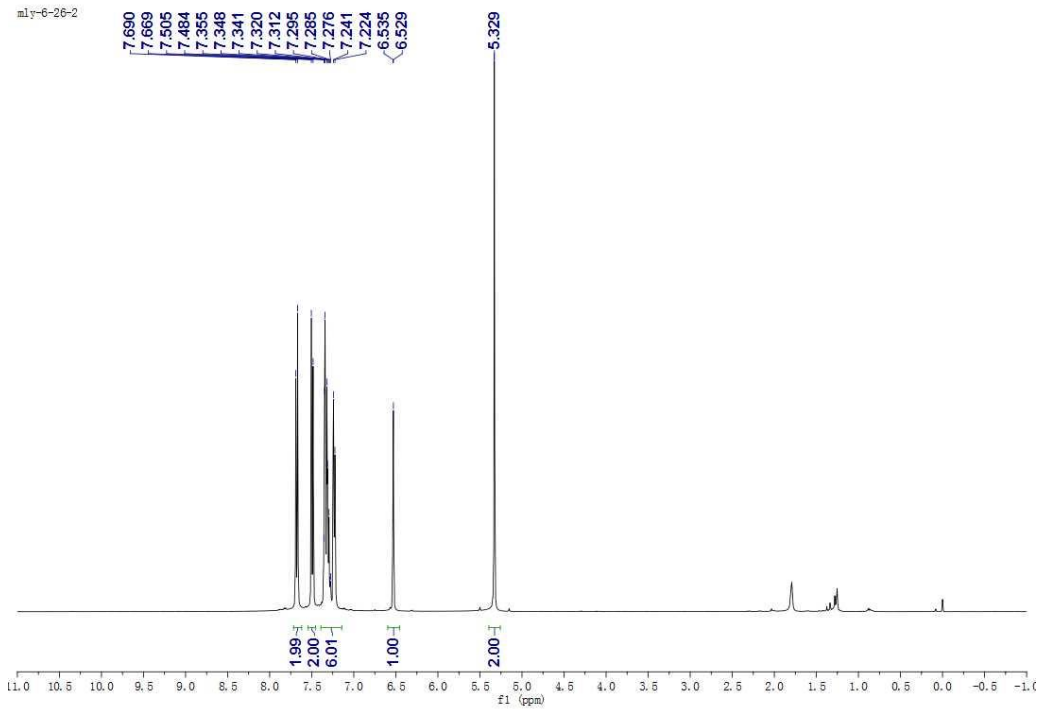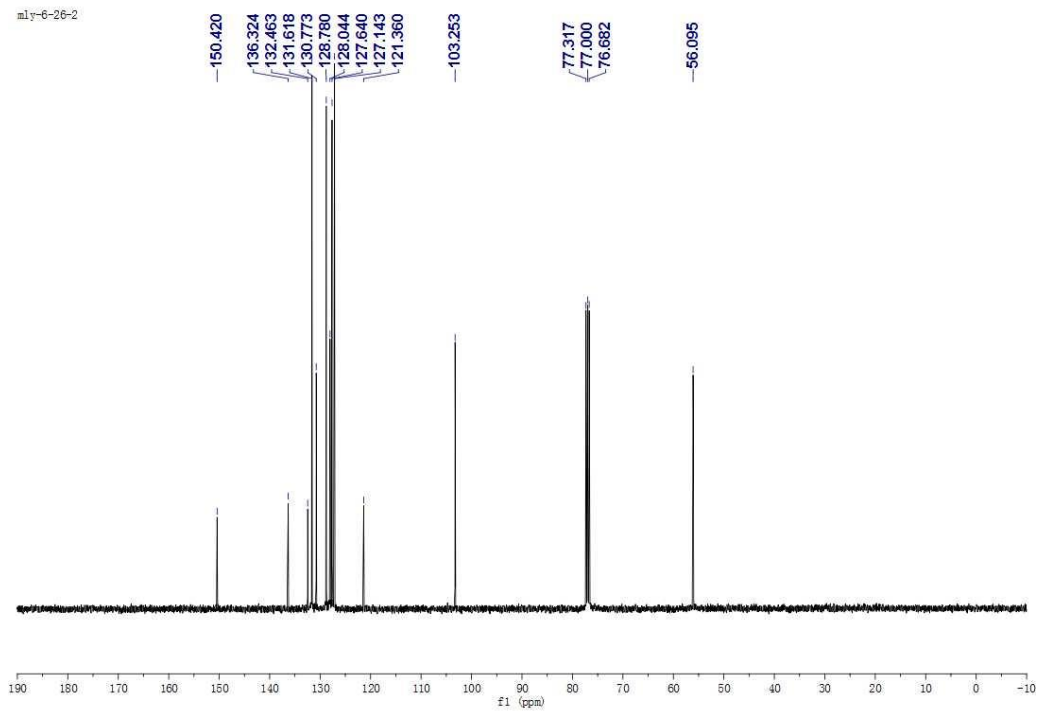



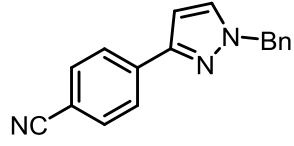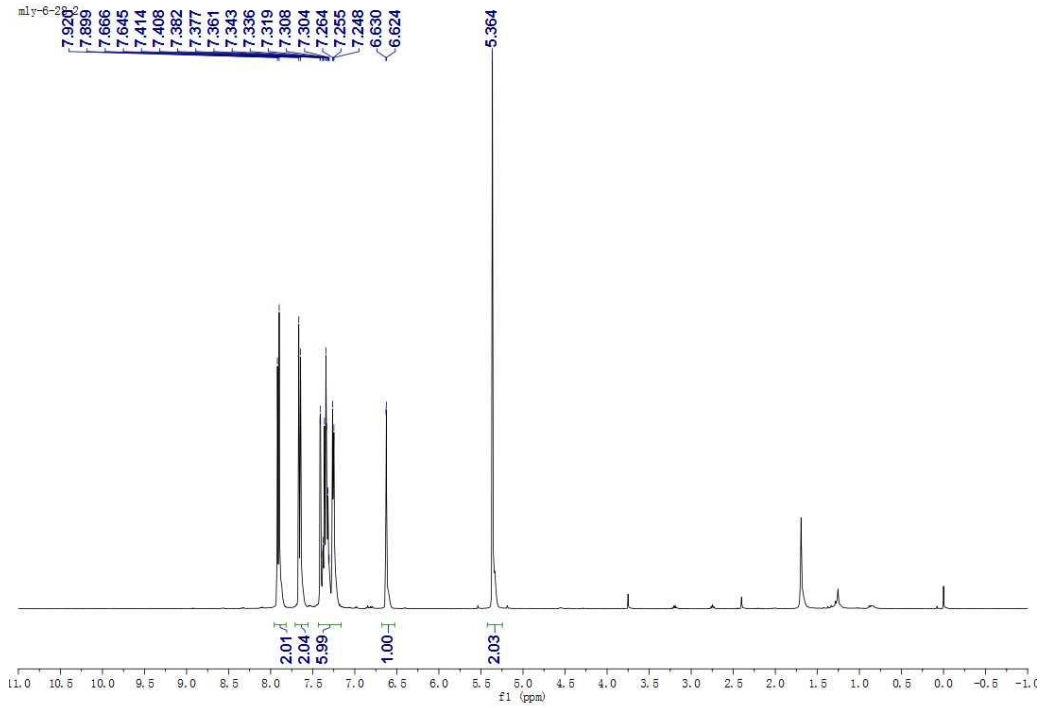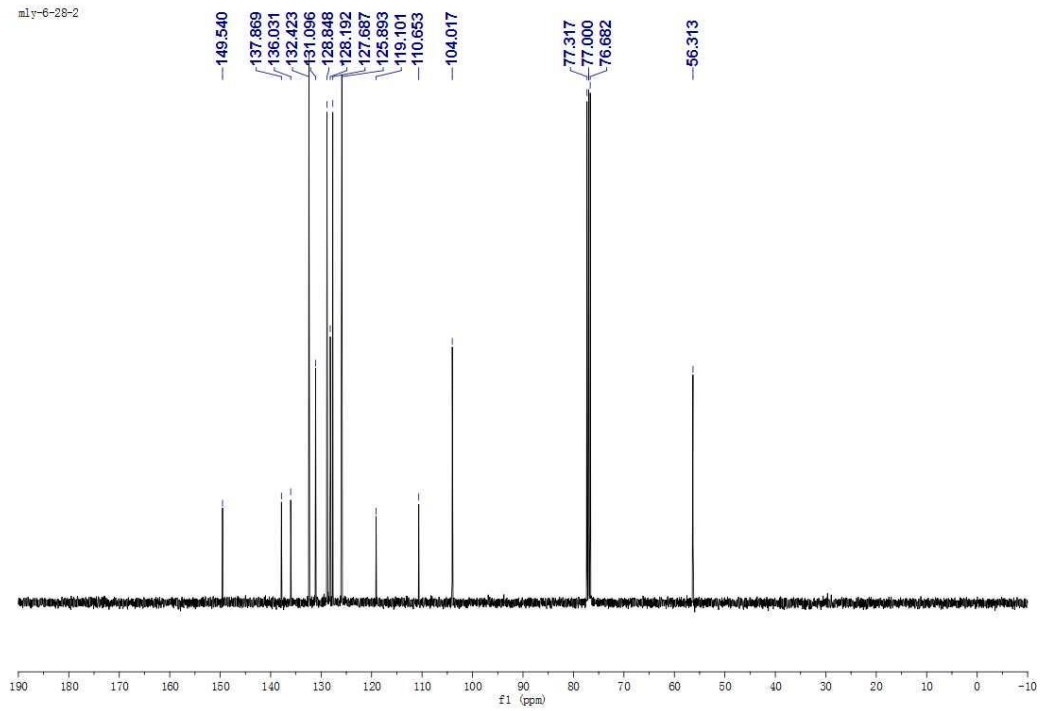

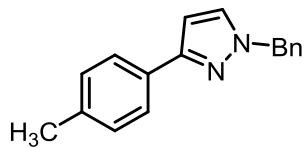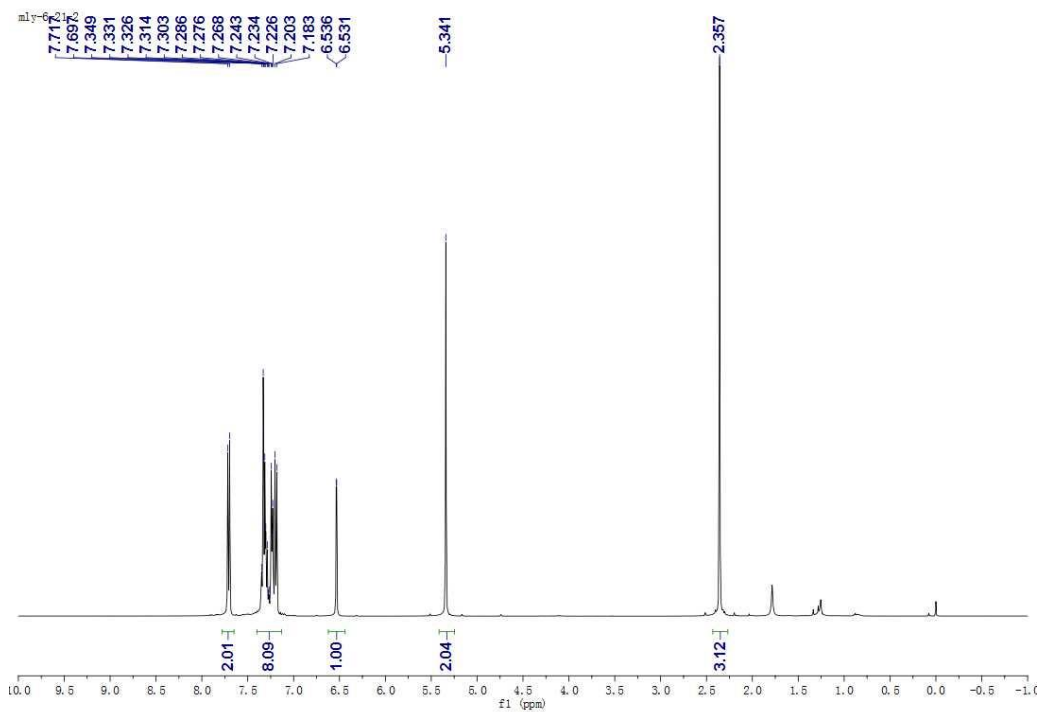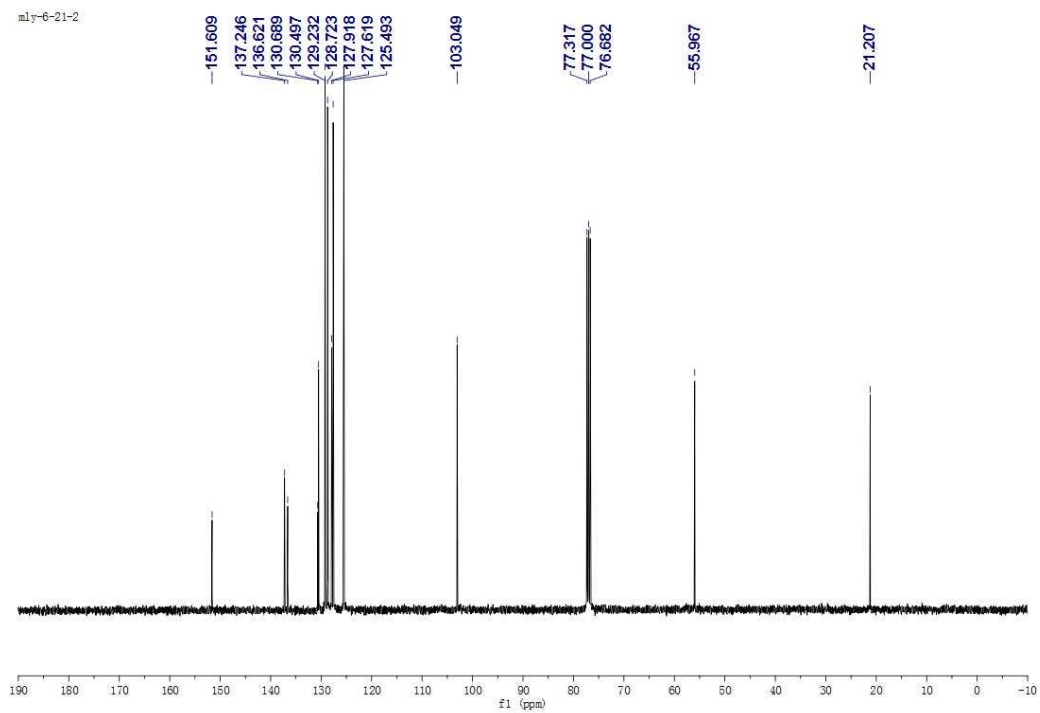

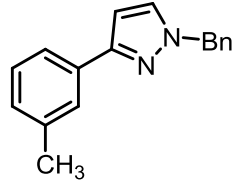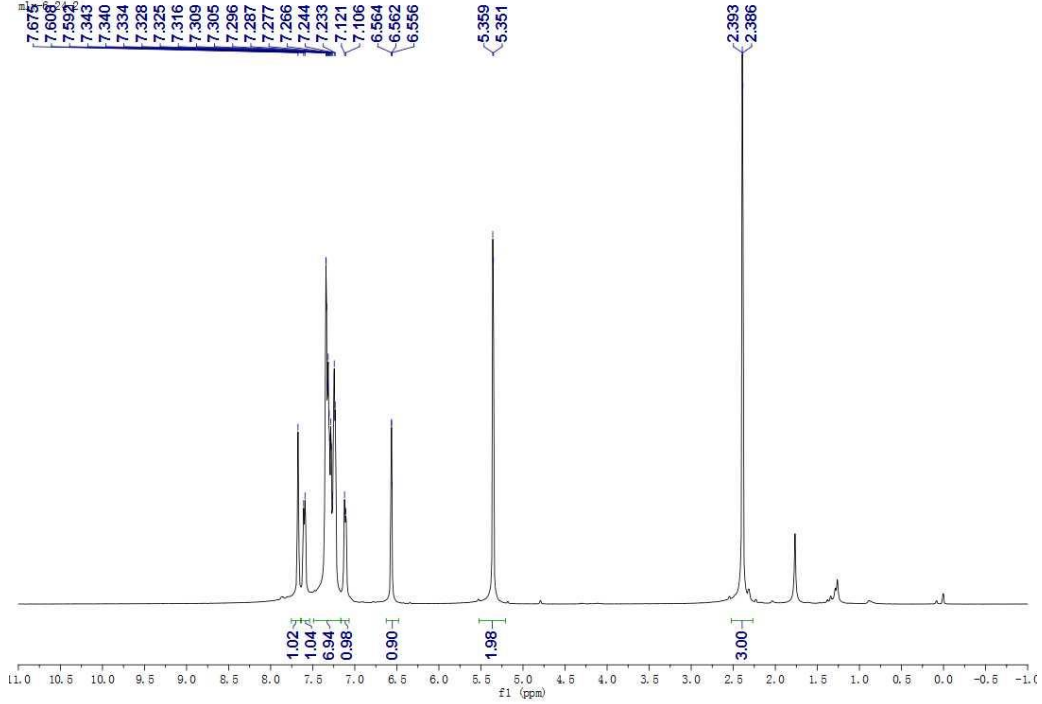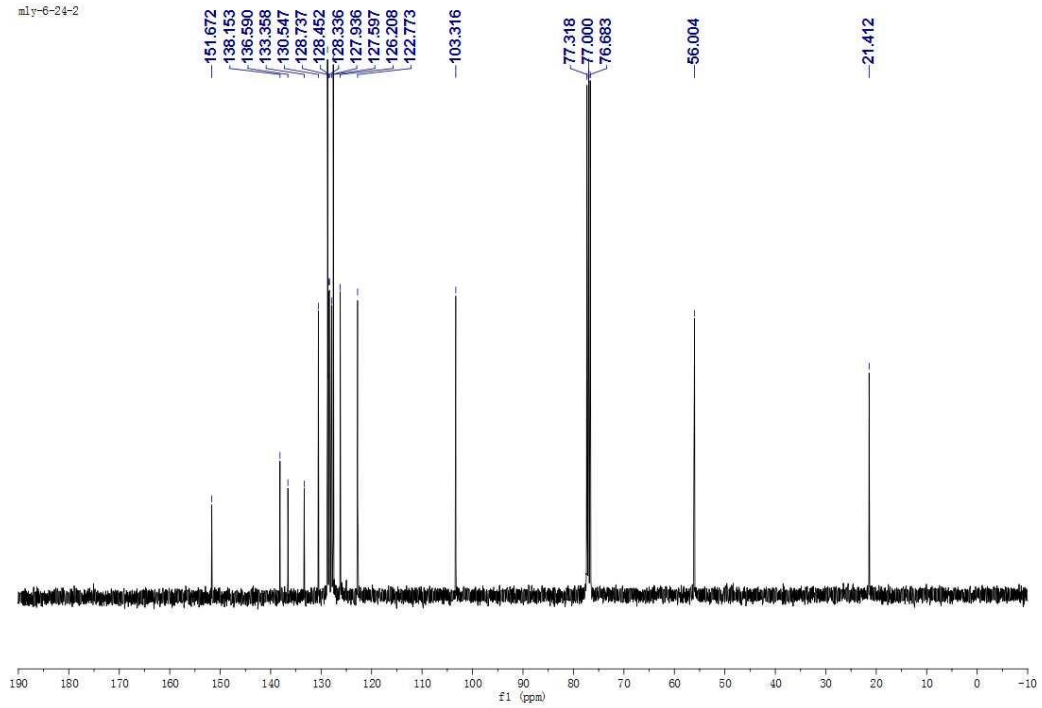

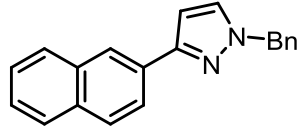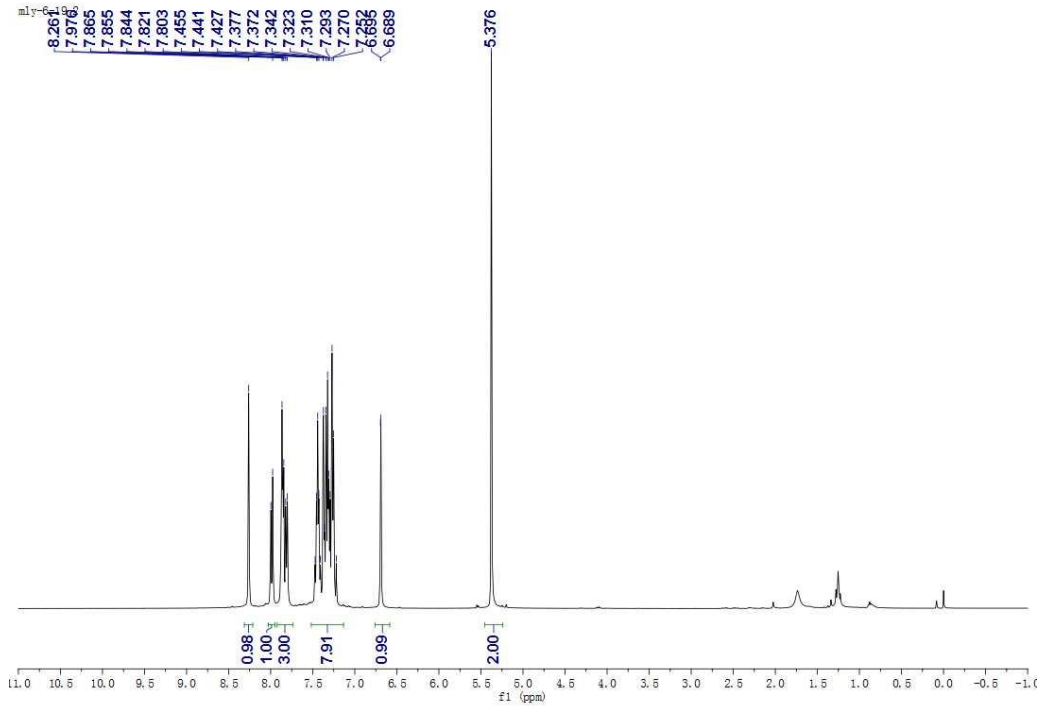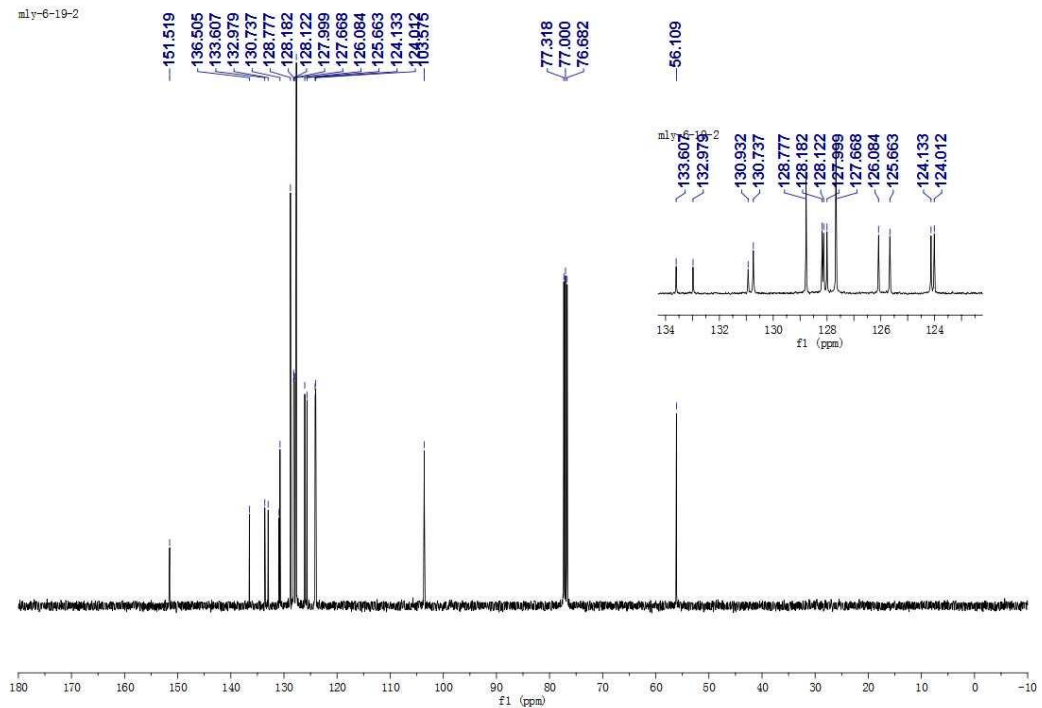

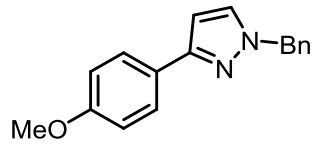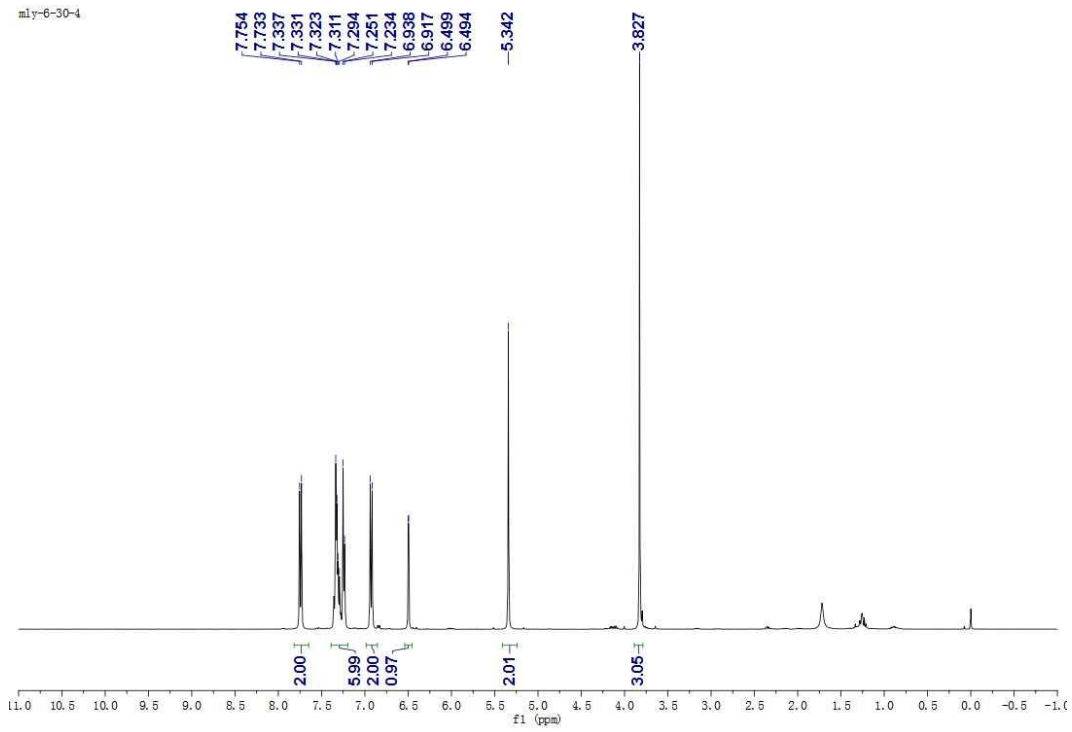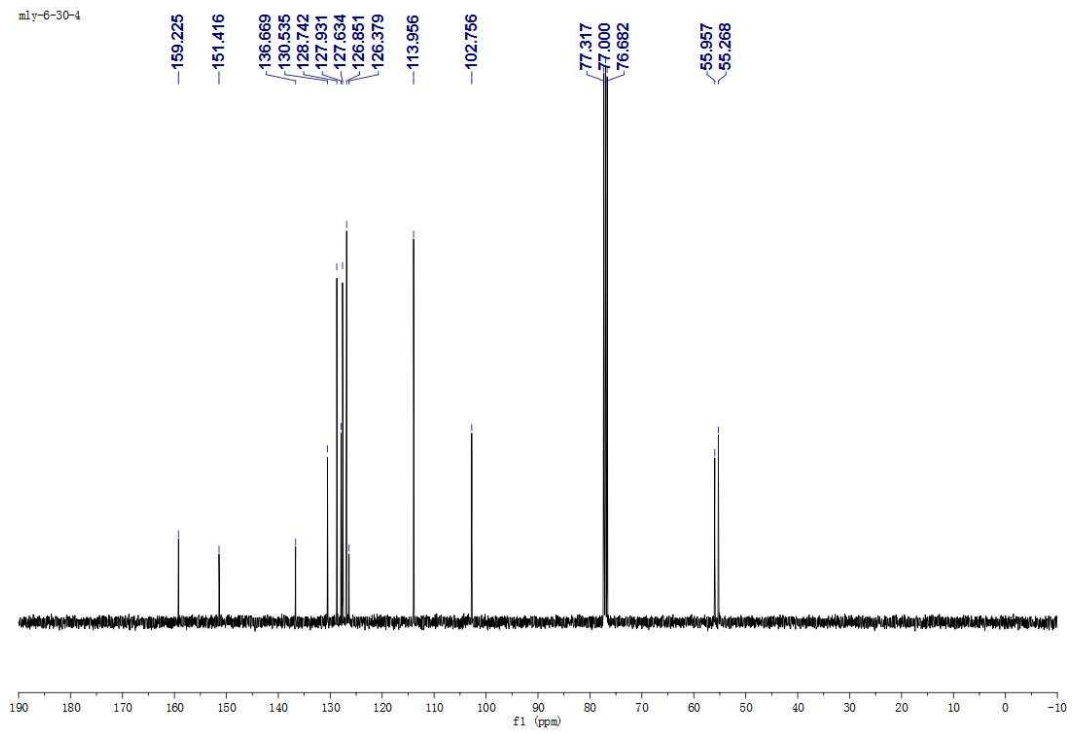

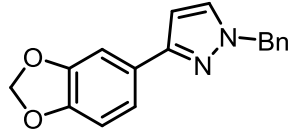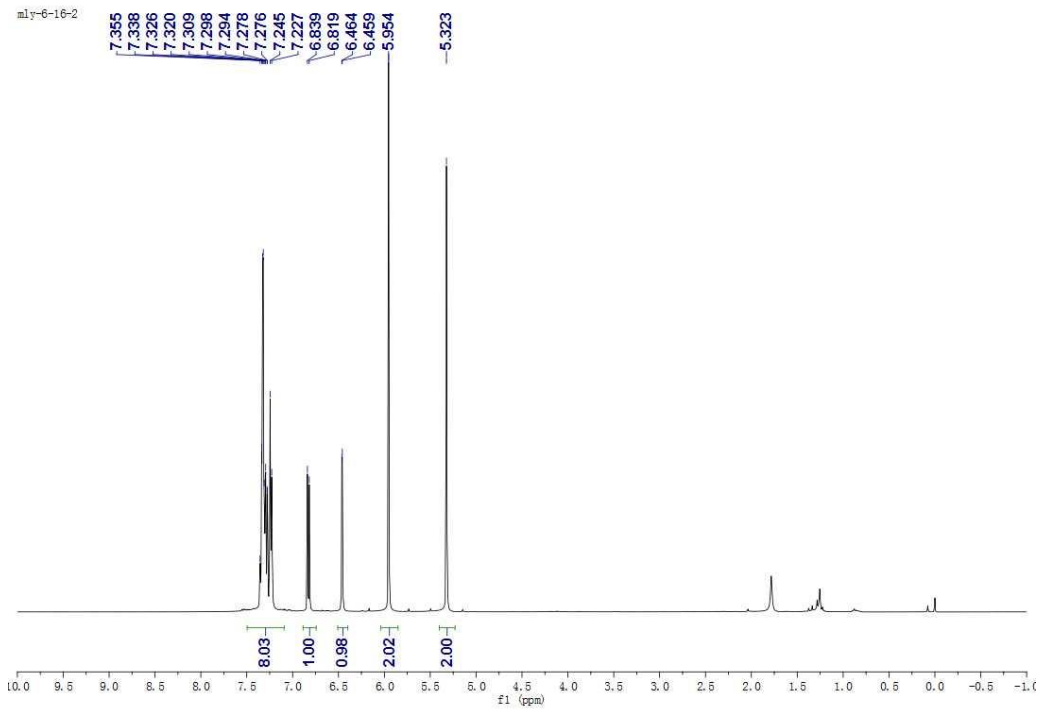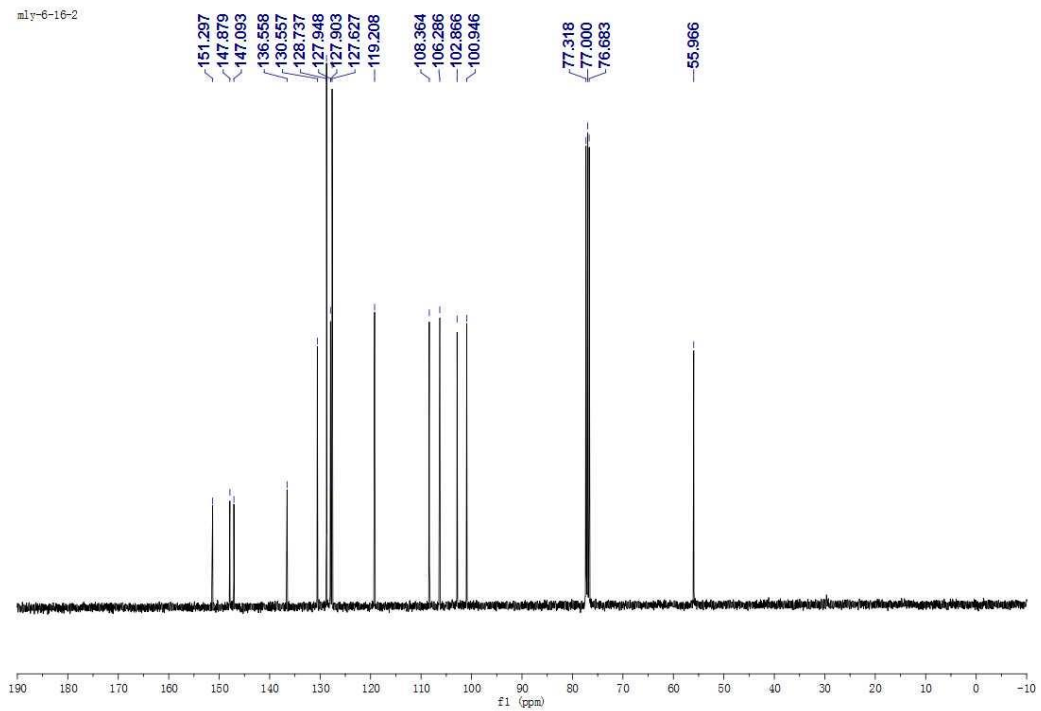

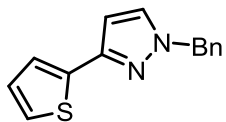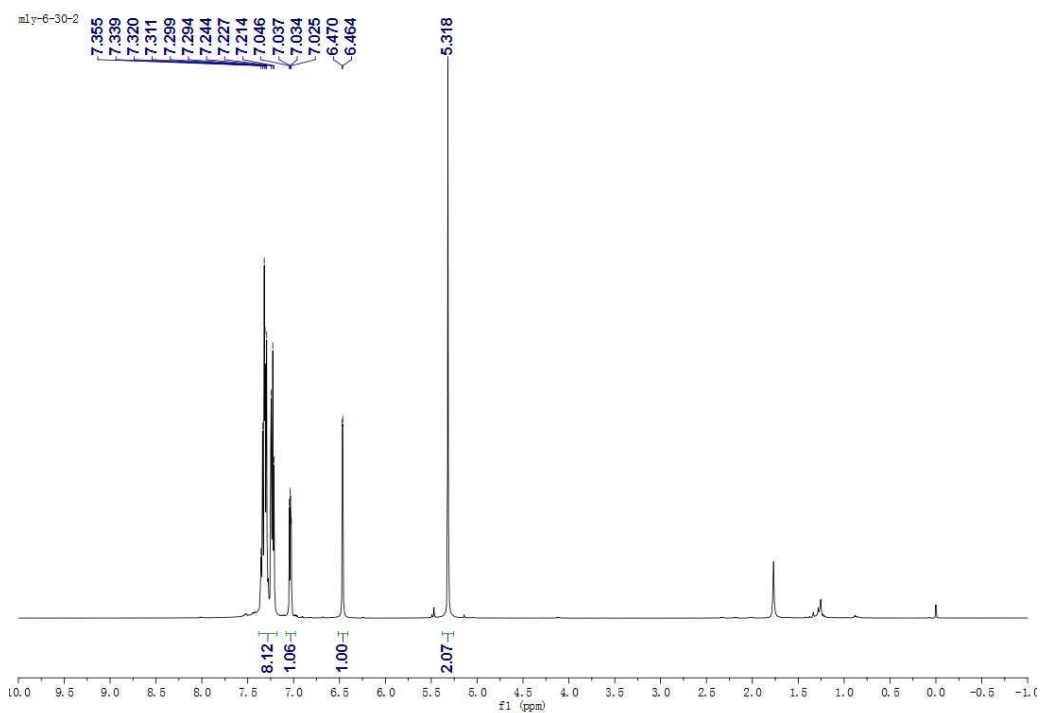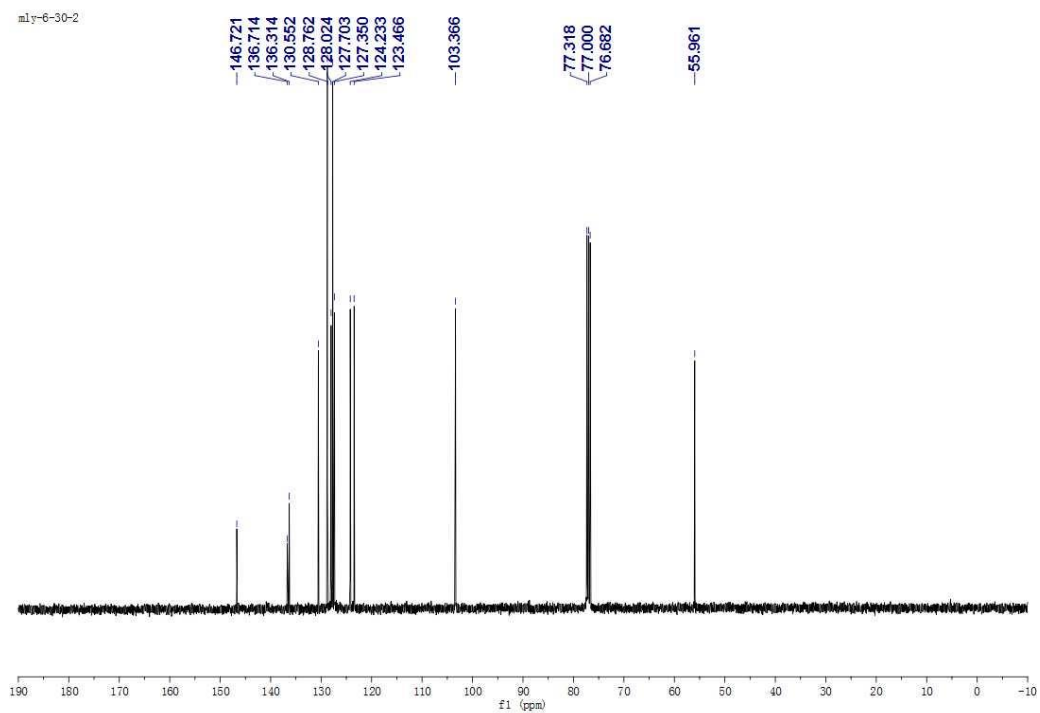

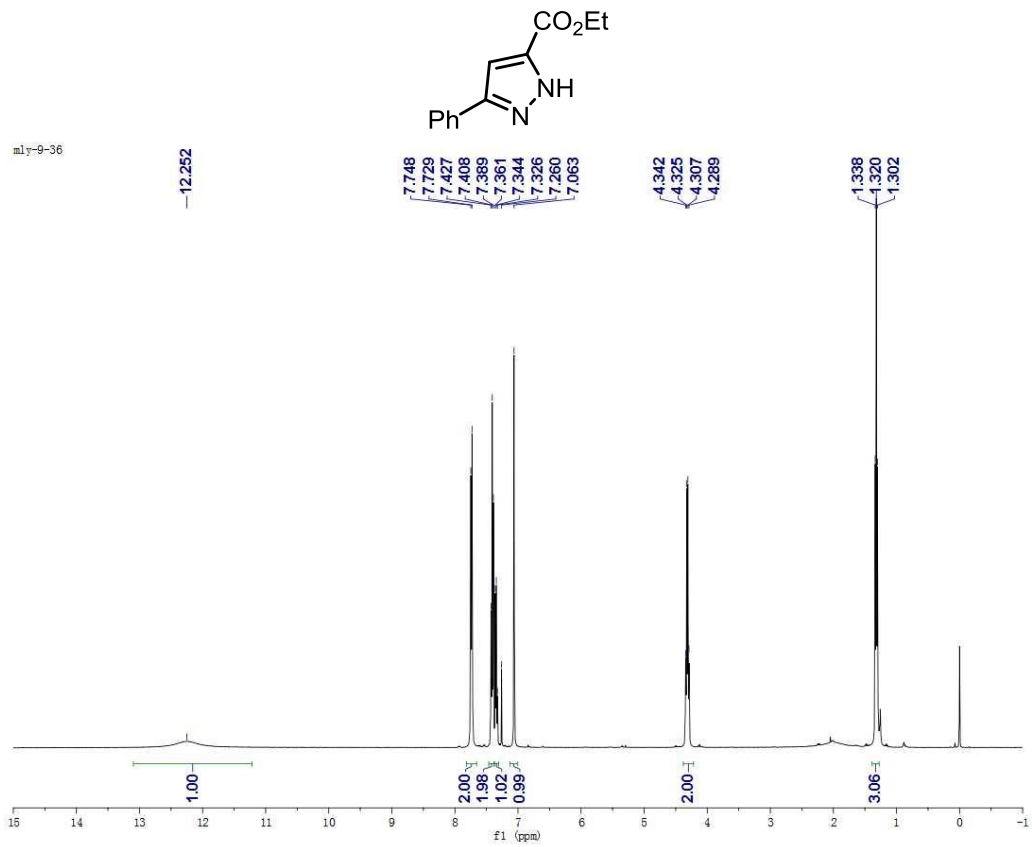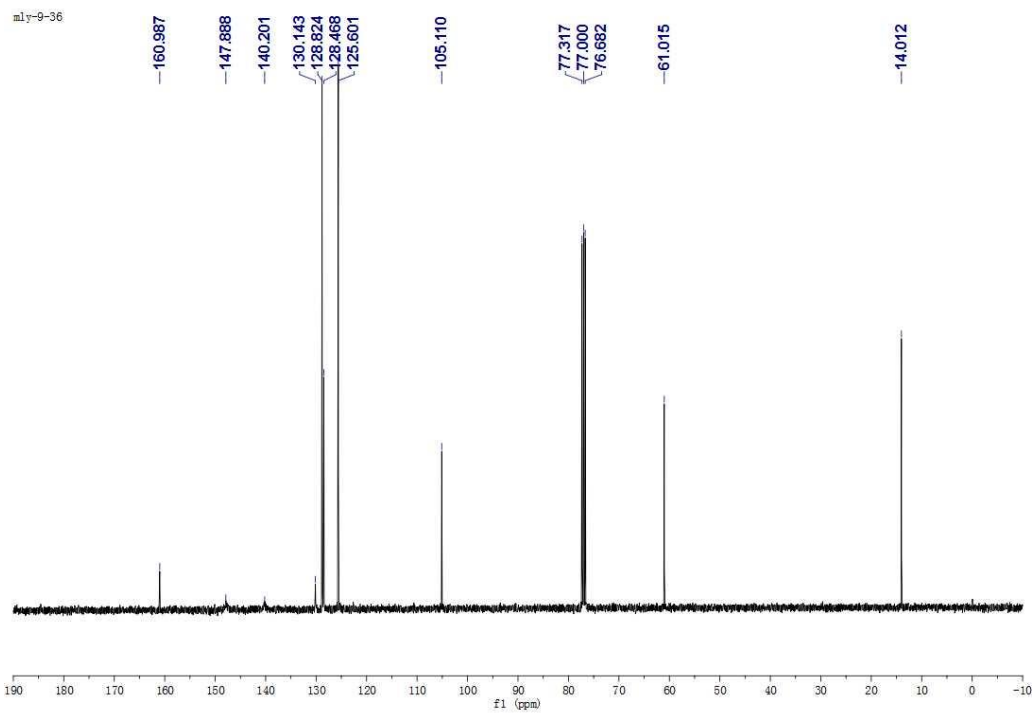

Supplement: d0ob01478h1.pdf [file d0ob01478h1.pdf]
